# Supplementary material
Source: PubMed Central journal article supplement (PMC10254677)
Supplement: bmjopen-2022-071397.draft_revisions.pdf [file bmjopen-2022-071397.draft_revisions.pdf]

# BMJ Open

BMJ Open is committed to open peer review. As part of this commitment we make the peer review history of every article we publish publicly available.

When an article is published we post the peer reviewers' comments and the authors' responses online. We also post the versions of the paper that were used during peer review. These are the versions that the peer review comments apply to.

The versions of the paper that follow are the versions that were submitted during the peer review process. They are not the versions of record or the final published versions. They should not be cited or distributed as the published version of this manuscript.

BMJ Open is an open access journal and the full, final, typeset and author-corrected version of record of the manuscript is available on our site with no access controls, subscription charges or pay-per-view fees (<http://bmjopen.bmj.com>).

If you have any questions on BMJ Open's open peer review process please email [info.bmjopen@bmj.com](mailto:info.bmjopen@bmj.com)

# BMJ Open

## Immunogenicity and safety of mixed COVID-19 vaccine regimens in immune mediated inflammatory diseases: an observational cohort

|                               |                                                                                                                                                                                                                                                                                                                                                                                                                           |
|-------------------------------|---------------------------------------------------------------------------------------------------------------------------------------------------------------------------------------------------------------------------------------------------------------------------------------------------------------------------------------------------------------------------------------------------------------------------|
| Journal:                      | <i>BMJ Open</i>                                                                                                                                                                                                                                                                                                                                                                                                           |
| Manuscript ID                 | bmjopen-2022-071397                                                                                                                                                                                                                                                                                                                                                                                                       |
| Article Type:                 | Original research                                                                                                                                                                                                                                                                                                                                                                                                         |
| Date Submitted by the Author: | 26-Dec-2022                                                                                                                                                                                                                                                                                                                                                                                                               |
| Complete List of Authors:     | Hitchon, Carol; University of Manitoba College of Medicine, Mesa, Christine; National Microbiology Laboratory<br>Bernstein, Charles; University of Manitoba College of Medicine<br>Marrie, Ruth Ann; University of Manitoba College of Medicine<br>Card, Catherine; National Microbiology Laboratory; University of Manitoba<br>O'Brien, Sheila F; Canadian Blood Services<br>Kim, John; National Microbiology Laboratory |
| Keywords:                     | COVID-19, RHEUMATOLOGY, GASTROENTEROLOGY, NEUROLOGY, IMMUNOLOGY                                                                                                                                                                                                                                                                                                                                                           |
|                               |                                                                                                                                                                                                                                                                                                                                                                                                                           |

SCHOLARONE™  
Manuscripts

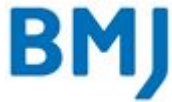

I, the Submitting Author has the right to grant and does grant on behalf of all authors of the Work (as defined in the below author licence), an exclusive licence and/or a non-exclusive licence for contributions from authors who are: i) UK Crown employees; ii) where BMJ has agreed a CC-BY licence shall apply, and/or iii) in accordance with the terms applicable for US Federal Government officers or employees acting as part of their official duties; on a worldwide, perpetual, irrevocable, royalty-free basis to BMJ Publishing Group Ltd ("BMJ") its licensees and where the relevant Journal is co-owned by BMJ to the co-owners of the Journal, to publish the Work in this journal and any other BMJ products and to exploit all rights, as set out in our [licence](#).

The Submitting Author accepts and understands that any supply made under these terms is made by BMJ to the Submitting Author unless you are acting as an employee on behalf of your employer or a postgraduate student of an affiliated institution which is paying any applicable article publishing charge ("APC") for Open Access articles. Where the Submitting Author wishes to make the Work available on an Open Access basis (and intends to pay the relevant APC), the terms of reuse of such Open Access shall be governed by a Creative Commons licence – details of these licences and which [Creative Commons](#) licence will apply to this Work are set out in our licence referred to above.

Other than as permitted in any relevant BMJ Author's Self Archiving Policies, I confirm this Work has not been accepted for publication elsewhere, is not being considered for publication elsewhere and does not duplicate material already published. I confirm all authors consent to publication of this Work and authorise the granting of this licence.

Running title: COVID-19 vaccination in IMIDs

Immunogenicity and safety of mixed COVID-19 vaccine regimens in immune mediated inflammatory diseases: an observational cohort

Running Title: COVID-19 vaccination in IMIDs

CA Hitchon <sup>1</sup>, C Mesa <sup>2</sup>, CN Bernstein <sup>1</sup>, RA Marrie <sup>1,3</sup>, C Card <sup>2,4</sup>, S O'Brien <sup>5</sup>, J Kim <sup>2</sup>

1 Department of Internal Medicine, Max Rady College of Medicine, Rady Faculty of Health Sciences, University of Manitoba, Winnipeg, CAN

2 National Microbiology Laboratory Public Health Agency of Canada Winnipeg, CAN

3 Department of Community Health Sciences, Max Rady College of Medicine, Rady Faculty of Health Sciences, University of Manitoba, Winnipeg, CAN

4 Department of Medical Microbiology and Infectious Diseases, Rady Faculty of Health Sciences, University of Manitoba, Winnipeg, CAN

5 Canadian Blood Services, Ottawa, CAN

Authors:

Carol A Hitchon MD MSc Department of Internal Medicine, Max Rady College of Medicine, Rady Faculty of Health Sciences, University of Manitoba, Winnipeg, CAN

Christine Mesa, MSc National Microbiology Laboratory Public Health Agency of Canada Winnipeg, CAN

Charles N Bernstein, MD Department of Internal Medicine, Max Rady College of Medicine, Rady Faculty of Health Sciences, University of Manitoba, Winnipeg, CAN

Ruth Ann Marrie, MD PhD Department of Internal Medicine, and Department of Community Health Sciences, Max Rady College of Medicine, Rady Faculty of Health Sciences, University of Manitoba, Winnipeg, CAN

Sheila O'Brien, PhD Canadian Blood Services, Ottawa, CAN

Catherine Card, PhD, National Microbiology Laboratory, Public Health Agency of Canada Winnipeg, CAN and Department of Medical Microbiology and Infectious Diseases, Rady Faculty of Health Sciences, University of Manitoba, Winnipeg, CAN

John Kim PhD National Microbiology Laboratory Public Health Agency of Canada Winnipeg, CAN

Running title: COVID-19 vaccination in IMIDs

Corresponding author

CA Hitchon

RR149 800 Sherbrook Street

Winnipeg, Manitoba

email: carol.hitchon@umanitoba.ca

Study funding from Research Manitoba. Dr Kim's lab receives funding from the Public Health Agency of Canada

Role of funding sources: The study sponsors had no role in study design, data collection, analysis, interpretation, writing, or in the decision to submit the manuscript.

Disclosures

CH: unrelated grant funding from Pfizer; Advisory board for Astra-Zeneca Canada for unrelated product, unrelated research funds from Research Manitoba, Health Sciences Center foundation, International League of Associations for Rheumatology, unrelated educational funds from the Royal College of Physicians and Surgeons of Canada.

RAM: Ruth Ann Marrie receives research funding from: CIHR, Research Manitoba, Multiple Sclerosis Society of Canada, Multiple Sclerosis Scientific Foundation, Crohn's and Colitis Canada, National Multiple Sclerosis Society, the CMSC, the Arthritis Society, Brain Canada, and US Department of Defense. She is a co-investigator on a study funded in part by Biogen Idec and Roche Canada. She is supported by the Waugh Family Chair in Multiple Sclerosis.

CNB: Dr Bernstein is supported by the Bingham Chair in Gastroenterology. Dr. Bernstein has served on advisory Boards for AbbVie Canada, Amgen Canada, Bristol Myers Squibb Canada, Roche Canada, Janssen Canada, Sandoz Canada, Takeda Canada, and Pfizer Canada; Consultant for Mylan Pharmaceuticals and Takeda; Educational grants from Abbvie Canada, Pfizer Canada, Takeda Canada, and Janssen Canada. Speaker's panel for Abbvie Canada, Janssen Canada, Pfizer Canada, and Takeda Canada. Received research funding from Abbvie Canada, Bristol Myers Squibb Canada, Sandoz Canada and Pfizer Canada.

CM: none

CC: Receives grant funding from PHAC and CITF through internal research funding streams at PHAC

SOB: none

JK: none

Running title: COVID-19 vaccination in IMIDs

Abstract 300/300 words

Manuscript 2889/4000 words

References 39

Tables 3; Figures 3

Supplemental Tables 3, Supplemental Figures 6

Key words: COVID-19, rheumatology, gastroenterology, neurology, immunology

For peer review only

Running title: COVID-19 vaccination in IMIDs

## Abstract

Objective: Among persons with immune-mediated inflammatory diseases (IMIDs) who received homologous or heterologous SARS-CoV-2 vaccines, we compared post-vaccine vaccine antibody responses and IMID disease activity/states.

Methods: In this single centre observational cohort study, we followed persons with diagnosed inflammatory arthritis (n= 78; 77% rheumatoid arthritis), systemic autoimmune rheumatic diseases (n=84; 63% lupus), inflammatory bowel disease (n= 93; 43% Crohn's), and multiple sclerosis (n= 72; 77% relapsing remitting) who received COVID-19 vaccinations between 03/2021-09/2022. Participants self-reported COVID-19 illness and exposure risks, IMID disease activity/state using disease-specific measures, and had anti-spike, -receptor binding domain (RBD) and -nucleocapsid (NC) IgG antibodies tested by multiplex immunoassays following each vaccination (V1, V2, V3, V4). Anti-SARS-CoV-2 responses were compared across vaccine regimens and to responses in 370 age-sex matched vaccinated blood donor controls.

Results: IMID participants were predominantly female (79.4%), with a mean (standard deviation) age of 56.0 (14.3) years. Most participants (66.1%) received homologous mRNA (BNT162b2 or mRNA1273) vaccines, 2.4% received homologous ChAdOx1, and 30.6% received heterologous vaccines (23.9% ChAdOx1/mRNA, 6.4% heterologous mRNA) for their first two vaccines. Seroconversion rates for 238 IMIDs increased 1 month post V2 (post-V1 anti-spike 52.0%, anti-RBD 58.9%; post-V2 anti-spike 91.5%, anti-RBD 90.22%, but remained lower than controls (post-V2 anti-Spike 98.1%  $p<0.0001$ ). Antibody titers waned by 3 months post V2 but increased 1 month post V3 and 1 month post V4. If primed with a vector vaccine, a mRNA vaccine increased antibody titers to those comparable to homologous mRNA vaccines. Anti-RBD and Spike titers were higher in anti-NC seropositive (N=31; 25 participants) versus seronegative samples ( $p<0.001$ ). IMID disease activity/state and rates of self-reported moderate or severe IMID flare were similar across vaccinations.

Interpretation: Heterologous COVID-19 vaccination improves seroconversion rates following a viral vector vaccine and does not lead to IMID disease flare. IMIDs benefit from at least three vaccines.

Funding: Research Manitoba, Public Health Agency of Canada

**Key Words: COVID-19, vaccination, immune systems diseases**

Running title: COVID-19 vaccination in IMIDs

### Strengths and limitations

- Longitudinal cohort study with systematic collection of data on COVID-19 infection, IMID disease activity and with paired biosamples for anti-SARSCoV2 IgG assays following each vaccine for up to four vaccines.
- Cross disease comparisons of four IMIDs from different medical specialties which are treated with immunocompromising medications.
- Validated measures of self-report IMID disease activity/state used to assess vaccine safety and risk of post-vaccine IMID disease flare.
- Relatively small sample size for each IMID and predominantly female population (as expected for these IMIDs) limits analysis of sex and gender effects.



Running title: COVID-19 vaccination in IMIDs

## Key Messages

### What is already known about this subject?

Some treatments used for people with immune-mediated inflammatory diseases (IMIDs) such as autoimmune inflammatory arthritis, systemic autoimmune rheumatic diseases, inflammatory bowel disease, and multiple sclerosis may reduce COVID-19 vaccine-mediated immunogenicity.

### What does this study add?

COVID-19 vaccines do not increase risk of disease flare for most IMIDs.

Across IMIDs, anti-SARS-CoV-2 antibody levels following a single vaccine were low but improved after receiving a second mRNA vaccine. Anti-SARS-CoV-2 antibody levels waned following the second vaccine and recovered after a third vaccine.

Vaccine induced anti-SARSCoV2 antibody titers are reduced in IMID participants taking immunosuppressants or biologics.

IMIDs who received an initial vector vaccine followed by a mRNA vaccine have vaccine induced anti-SARSCoV2 antibody titers comparable to those following a homologous mRNA vaccine course.

### How might this impact on clinical practice?

These observations support the use of heterologous vaccine courses and third vaccines for people with IMIDs particularly in the setting of immunosuppression and biologic treatment.

These data can inform public health recommendations for COVID-19 vaccination that balance the need for optimal vaccine-induced protection with the need for feasible local vaccination programs and global vaccine equity.

Running title: COVID-19 vaccination in IMIDs

## Introduction

COVID-19 vaccines have reduced rates of serious severe acute respiratory syndrome coronavirus (SARS-CoV-2) infection and mortality in the general population.<sup>1-4</sup> However, information on optimal vaccine strategies for immunocompromised individuals who are at increased risk of serious COVID-19 infection is limited.

Immune-mediated inflammatory diseases (IMIDs) such as autoimmune inflammatory arthritis (IA), systemic autoimmune rheumatic disease (SARD), inflammatory bowel disease (IBD), and multiple sclerosis (MS) affect 5% of the general population and share an autoimmune phenotype that affects multiple organ systems and treatment with immune therapies<sup>5</sup>. Due to immune-mediated disease and treatment, some people with IMIDs are at increased risk of vaccine preventable disease including serious COVID-19 infection<sup>6-10</sup>. While COVID-19 vaccines are effective in the general population, immune dysregulation from disease or treatment may impair vaccine responses in people with IMIDs. Due to evolving regional vaccination strategies in our region (<sup>11</sup> and Supplemental Figure 1), a high proportion of individuals with immunocompromised conditions received heterologous vaccine courses. Although available data on immunogenicity of these mixed vaccine courses in the general population are reassuring,<sup>12-14</sup> data are limited regarding the safety and immunogenicity of this strategy for immunocompromised patients as are data comparing these outcomes across diseases.

We established a cohort of patients diagnosed with any of IA, SARDs, IBD or MS to determine the safety (IMID flare) and humoral immunogenicity following COVID-19 vaccination and to assess the impact of mixing COVID-19 vaccine types. Herein, we report the clinical safety results and seroconversion results obtained after four vaccinations and compare seroconversion rates across initial vaccine combinations.

## Methods:

Study Design: This single site observational cohort from Manitoba, Canada, was established in March 2021 and enrolled people diagnosed with any of IA, SARDs, IBD, or MS. Data was

Running title: COVID-19 vaccination in IMiDs

collected until October 30<sup>th</sup> 2022. Vaccines were administered in accordance with provincial public health recommendations. Study participants were followed 1 and 3 months after each vaccine for up to four vaccines.

Clinical data collected: Demographic data, including birth date, sex, self-reported ethnic group according to Canadian Institute for Health Information guidelines<sup>15</sup>, highest education level achieved, self-reported comorbidity and health behaviors such as smoking history were collected at baseline. Clinical data including IMiD treatment, IMiD-specific disease activity/state measures, participant reported interval COVID-19 infections, and biosamples were collected at each visit. IMiD treatment was subcategorized as immunosuppressants, biologic or advanced therapies, other immunomodulators, and corticosteroids (Supplementary Table 1). Self-reported IMiD disease activity/status was assessed with disease relevant validated measures (IA: Routine Assessment of Inflammatory Disease version 3 RAPID-3, Rheumatoid Arthritis Flare Core domain indices; SARDs: Systemic Lupus Activity Questionnaire SLAQ; IBD: Inflammatory Bowel Symptoms Severity Index-Short Form (IBDSI-SF), Manitoba IBD flare question; MS: self report disease activity, Expanded Disability Status Scale [EDSS])<sup>16-20</sup>. These disease-related questionnaires were fully completed for IBD (248/255 97% visits), IA (208/215; 97% visits), SARDs (239/260; 92% visits), and MS (291/327; 89% visits). Data were not imputed. Individuals could attend a study visit in person or submit their data by mailed paper forms or direct entry into a REDCap electronic database hosted at the University of Manitoba<sup>21</sup>. Participants had the option to participate in the safety study component only.

Biosamples: Participants not attending the clinic were provided kits to collect blood by finger poke on dried blood spot (DBS) cards for postal submission<sup>22</sup>. Participants attending the clinic had blood collected by venipuncture and DBS were prepared before processing blood for serum. Aliquoted serum and DBS cards were stored at -20C for batch testing.

Regional population control biosample data were obtained from 370 Canadian Blood Services blood donors who were age and sex-matched to the clinical cohort.

Serology: A bead-based multiplexed immunoassay was used to detect IgG anti-Spike (S1), Receptor Binding Domain (RBD) (reflecting response to vaccine), and Nucleocapsid (NC)

Running title: COVID-19 vaccination in IMIDs

antibodies (reflecting response to infection) (Bio-Rad Bioplex 2200 SARS-CoV-2 IgG assay). This assay was chosen based on an evaluation of several multiplex platforms using a large panel of well-pedigreed plasma-DBS specimens<sup>22</sup>. The quantitative measurement of the antibody response used the WHO International standard for anti-SARS-CoV-2 antibody detection. Cut-offs for seropositivity for DBS samples were established using ROC curve analysis. Cut-offs for plasma from the company were used. Sera from IA (n=19) and lupus (n=31) patients collected before the pandemic were tested to evaluate the potential for false positive SARS-CoV-2 antibody tests in IMIDs with known autoantibodies. Concordance of antibody assays in paired DBS and serum samples was assessed using the Kendalls tau b test. The controls were tested using the Roche Elecsys<sup>®</sup> anti-SARS-CoV-2 spike protein semiquantitative immunoassay (Roche Diagnostics International Ltd, Rotkreuz, Switzerland) which measures total antibodies (including IgA, IgM and IgG) to the SARS-CoV2- spike protein (anti-S) and the Roche Elecsys<sup>®</sup> anti-SARS-CoV-2 qualitative immunoassay (Roche Diagnostics LTD Rotkreuz, Switzerland) which measures total antibodies (including IgA, IgM and IgG) to SARS-CoV-2 recombinant protein, nucleocapsid antigen (anti-NC).

Analysis: Demographic information of participants is reported using descriptive statistics including mean (standard deviation-sd), median (range or interquartile range-IQR), and counts (%). Non-parametric tests (Mann-Whitney U or Kruskal Wallis tests with Bonferroni adjustment [Badj] for multiple comparisons) were used to compare antibody levels across groups and visits. Wilcoxon signed rank tests were used to compare antibody levels across visits within individuals. Binary logistic regression was used to evaluate predictors of seroconversion one month following vaccine 2 (V2). Variables included sex, age greater than 65 years, IMID diagnosis, and treatment category (none versus biologics and advanced therapies versus immunosuppressants versus other agents), and vaccine mix (vector-mRNA versus mRNA-mRNA). Statistical analysis was conducted using IBM SPSS Statistics version 27 for Windows (IBM Corporation, Armonk, N.Y., USA).

All subjects provided informed consent. The study was approved by the University of Manitoba Health Research Ethics Board (HS24647-H2021-005), Manitoba Shared Health (SH2021:009),

Running title: COVID-19 vaccination in IMIDs

and the Health Canada and Public Health Agency of Canada Research Ethics Board (REB 2021-018P).

Patient/public involvement: Patients and public informed the study questions but were not involved in study design, conduct or reporting.

### Results:

Between March 12th 2021 and July 30 2022, we recruited 339 participants (Supplementary Figure 2). Vaccination and disease activity data for the time points reported herein were available for 327 participants (78 IA: 77% RA; 84 SARDS: 63 % lupus; 93 IBD: 43 % Crohn's and 72 MS: 77% Relapsing remitting) (Table 1). Most were female (79.4%) and white (84.7%) with a mean (sd) age of 56.0 (14.3) years. Nearly one-third (30.6%) of IMID participants were taking biologics or advanced therapies.

Running title: COVID-19 vaccination in IMiDs

Table 1 Demographics, vaccines administered, self reported IMiD flare, and COVID-19 history of participants

|                                         | <b>IA<br/>N=78</b> | <b>SARDs<br/>N=84</b> | <b>IBD<br/>N=93</b> | <b>MS<br/>N=72</b> | <b>All IMiDs<br/>N=327</b> |
|-----------------------------------------|--------------------|-----------------------|---------------------|--------------------|----------------------------|
| Age, years (mean SD)                    | 61.9(11.8)         | 55.7(13.4)            | 53.7(16.4)          | 53.1(13.5)         | 56.0 (14.3)                |
| Female n (%)                            | 66 (84.6)          | 75 (89.3)             | 59(63.4)            | 59 (81.9)          | 259 (79.4)                 |
| White n (%)                             | 66(84.6)           | 64 (76.2)             | 79(84.9)            | 68 (94.4)          | 277 (84.7)                 |
| Education                               |                    |                       |                     |                    |                            |
| Years of school (median/IQR)            | 15.0(4.5)          | 16.0(4.3)             | 16.0(4.0)           | 16.0(5.0)          | 16.0(4.0)                  |
| Comorbidity (n %) <sup>2</sup>          |                    |                       |                     |                    |                            |
| Cardiovascular                          | 35 (44.9)          | 31 (36.9)             | 26 (28.0)           | 22 (30.5)          | 115(35.1)                  |
| Pulmonary                               | 8 (10.2)           | 24 (28.6)             | 15 (16.1)           | 8 (11.1)           | 55(16.8)                   |
| Diabetes                                | 13 (19.7)          | 3 (3.7)               | 3 (3.4)             | 5 (6.9)            | 24(7.3)                    |
| Other endocrine                         | 25 (32.1)          | 24 (28.6)             | 20 (21.5)           | 20 (27.8)          | 90(27.4)                   |
| Renal disease                           | 2 (3.0)            | 9 (11.0)              | 4 (4.3)             | 0 (0.0)            | 15(4.6)                    |
| Cancer                                  | 15 (19.2)          | 10 (11.9)             | 12 (12.9)           | 56.9)              | 43 (13.10)                 |
| Mental Health                           | 17 (21.8)          | 27 (32.9)             | 27 (29.0)           | 22 (30.6)          | 94(28.7)                   |
| Total (median range)                    | 2.5(0-10)          | 3(0-10)               | 2(0-10)             | 2(0-6)             | 2(0-10)                    |
| BMI (mean SD)                           | 27 (6.6)           | 28.0 (7.8)            | 27.2 (6.1)          | 28.0 (6.2)         | 27.7 (6.7)                 |
| IMiD Treatment level <sup>1</sup> n (%) |                    |                       |                     |                    |                            |
| Immunomodulators                        | 4(5.1)             | 25 (30.5)             | 20 (21.5)           | 28(38.9)           | 76 (23.5)                  |
| Immunosuppressants                      | 27 (34.6)          | 42 (51.2)             | 10 (10.8)           | 0 (0.0)            | 79 (31.1)                  |
| Biologics/JAKi                          | 37(47.4)           | 7 (8.5)               | 41 (44.1)           | 14 (19.4)          | 99 (30.6)                  |
| - anti-TNF (n)                          | 21                 | 0                     | 28                  | 0                  | 49                         |
| - anti-B cell (n)                       | 5                  | 7                     | 0                   | 10                 | 22                         |
| - other or JAKi (n)                     | 11                 | 0                     | 13                  | 4                  | 28                         |
| None                                    | 10 (12.8)          | 8 (9.8)               | 22(23.7)            | 30 (41.7)          | 70 (21.6)                  |
| Vaccine type V1 n (%) <sup>3</sup>      |                    |                       |                     |                    |                            |
| CHAdOx1                                 | 15 (19.5)          | 28 (33.3)             | 17 (18.3)           | 26 (36.1)          | 86 (26.4)                  |
| BNT                                     | 60 (77.9)          | 56 (66.7)             | 66 (71.0)           | 39 (54.2)          | 221 (67.8)                 |
| mRNA1273                                | 2 (2.6)            | 6 (7.1)               | 10 (10.8)           | 7 (9.7)            | 25 (7.7)                   |
| Vaccine type V2 n (%) <sup>3</sup>      |                    |                       |                     |                    |                            |
| CHAdOx1                                 | 2 (2.6)            | 3 (3.6)               | 3 (3.2)             | 1 (1.4)            | 9 (2.7)                    |
| BNT                                     | 65 (84.4)          | 58 (68.7)             | 60 (65.2)           | 54 (75.0)          | 236 (72.8)                 |
| mRNA1273                                | 16 (13.0)          | 23 (27.7)             | 29 (31.5)           | 17 (23.6)          | 79(24.4)                   |
| Vaccine type V3 n/N (%) <sup>3</sup>    |                    |                       |                     |                    |                            |
| CHAdOx1                                 | 0                  | 0                     | 1 (1.3)             | 1 (1.6)            | 2 (0.7)                    |
| BNT                                     | 54 (71)            | 58 (78.4)             | 49 (66.2)           | 39 (61.9)          | 200 (71.2)                 |
| mRNA1273                                | 16 (21.1)          | 16 (21.6)             | 24 (32.4)           | 23 (36.5)          | 79 (28.1)                  |
| Other                                   | 0                  | 0 (0)                 | 1 (1.4)             | 1 (1.6)            | 2 (0.7)                    |
| Vaccine type V4 n/N (%) <sup>3</sup>    |                    |                       |                     |                    |                            |
| CHAdOx1                                 | 0 / (0)            | 1 (2.7)               | 0 (0)               | 0 (0)              | 1 (0.8)                    |
| BNT                                     | 25 (69.4)          | 28 (75.7)             | 25 (64.1)           | 12 (70.6)          | 90 (69.8)                  |

Running title: COVID-19 vaccination in IMIDs

|                                          |               |               |               |             |                |
|------------------------------------------|---------------|---------------|---------------|-------------|----------------|
| mRNA1273                                 | 10 (27.8)     | 8 (21.6)      | 14 (35.9)     | 2 (11.8))   | 34 (26.4)      |
| Other                                    | -             | -             | -             | 3 (17.6)    | 3 (2.3)        |
| Vaccines for V1 and V2 n (%)             |               |               |               |             |                |
| CHAdOx1-- BNT                            | 9 (11.5)      | 10 (11.9)     | 4 (4.3)       | 17 (23.6)   | 40(12.2)       |
| CHAdOx1 - mRNA1287                       | 4 (5.1)       | 15(17.9)      | 11 (11.8)     | 8 (11.1)    | 38 (11.6)      |
| BNT – mRNA1273 or<br>mRNA1273-BNT        | 4 (5.1)       | 5 (6.0)       | 10 (10.8)     | 2 (2.8)     | 21 (6.4)       |
| BNT-CHAdOx1                              | 0(0)          | 0(0)          | 1 (1.1)       | 0(0)        | 1 (0.3)        |
| CHAdOx1-CHAdOx1                          | 2 (2.6)       | 3 (3.6)       | 2 (2.2)       | 1 (1.4)     | 8 (2.4)        |
| BNT- BNT                                 | 56(71.8)      | 46 (54.8)     | 55 (59.1)     | 37 (51.4)   | 194 (59.3)     |
| mRNA1273 -mRNA1273                       | 2 (2.6)       | 4 (4.8)       | 9 (9.7)       | 7 (9.7)     | 22 (6.7)       |
| Vaccine interval                         |               |               |               |             |                |
| Days between V1 and V2<br>median (range) | 66 (21-97)    | 62 (20-188)   | 57 (20-98)    | 59 (26-97)  | 60 (20-188)    |
| Self-report IMID flare <sup>4,5</sup>    |               |               |               |             |                |
| 1 month post V1 n/N (%)                  | 12/40 (30.0)  | 10/39 (25.6)  | 8/41 (19.5)   | 1/17 (5.9)  | 31/137(22.6)   |
| 1 month post V2 n/N (%)                  | 8/53 (15.5)   | 9/53 (17.0)   | 17/69(24.6)   | 2/65 (3.1)  | 36/240(15.0)   |
| 1 month post V3 n/N (%)                  | 11/55 (20.0)  | 19/59 (32.2)  | 14/63 (22.2)  | 1/57 (1.8)  | 45/234 (19.2)  |
| 1 month post V4 n/N (%)                  | 6/37 (16.2)   | 12/34 (35.3)  | 8/40 (20.0)   | 1/23 (4.3)  | 27/134 (20.1)  |
| 1 month post any V n/N(%)                | 37/185 (20.0) | 50/185 (27.0) | 47/213 (22.1) | 5/162 (3.1) | 139/745 (18.0) |
| COVID-19 illness -ever <sup>5</sup>      |               |               |               |             |                |
| None                                     | 43 (55.1)     | 38 (46.3)     | 46 (50.0)     | 31 (43.1)   | 158 (48.8)     |
| Suspected but not tested                 | 27 (34.6)     | 29 (35.4)     | 22 (23.9)     | 24 (33.3)   | 112(34.6)      |
| COVID-19 PCR +ve                         | 8 (10.3)      | 13 (15.9)     | 14 (15.2)     | 17 (23.6)   | 52 (16.0)      |
| COVID-19 +ve hospitalized                | 0 (0.0)       | 2 (2.4)       | 0 (0.0)       | 0 (0.0)     | 2 (0.6)        |

IA=inflammatory arthritis; SARDs = systemic autoimmune rheumatic disease; IBD = inflammatory bowel disease; MS= multiple sclerosis; IMID = immune mediated inflammatory disease; FT=full time; PT= part time; BMI=body mass index; JAKi= janus kinase inhibitor; TNF= tumor necrosis factor inhibitor; BNT= BNT162b2 vaccine V1= first vaccine; V2 = second vaccine, V3 = third vaccine; V4 = fourth vaccine; NA=not available, PCR= polymerase chain reaction; IQR = interquartile range

<sup>1</sup> IMID treatment based on most aggressive combination if on multiple agents. 1 RA subject on only prednisone monotherapy. Medication data missing for 2 SARDs subjects

<sup>2</sup> cardiovascular disease includes ischemic heart disease, congestive heart failure, valvular heart disease peripheral vascular disease stroke or transient ischemic attack or hypertension; respiratory disease includes asthma or chronic obstructive pulmonary disease, other endocrine includes thyroid disease, hypercholesterolemia

<sup>3</sup> Vaccine data available for V1 N=326 (77 IA, 84 SARDS, 72 MS 93 IBD); V2 N=324 (77IA, 83 SARDS, 72 MS 92 IBD); V3 N=281 (76 IA, 74 SARDS, 63 MS, 74 IBD) V4 N=128 (35 IA, 37 SARDS 39 IBD 17 MS).

<sup>4</sup> Flare assessed by the following questions: IA: "Are you having a flare? SARDs: "In the past 3 months have you had a disease flare (A flare is when your disease gets worse)? Yes moderate or severe flare;

Running title: COVID-19 vaccination in IMiDs

1  
2  
3 IBD: In the past 6 months my disease has been: Constantly active, giving me symptoms every day, or  
4 often active, giving me symptoms most days or sometimes active, giving me symptoms on some days  
5 (for instance 1-2 days/week); MS Do you feel there has been a change in your MS since your last visit?  
6 “My multiple sclerosis is much worse and in a flare”  
7

8  
9 Flare rate across IMiDs 1 month after any vaccine  $\chi^2$  36.5  $p < 0.0001$ ; Flare rate post V1 across IMiDs  
10 non-significant. Flare rate post V2 across IMiDs  $\chi^2$  12.4  $p = 0.006$ ; Flare rate post V3 across IMiDs  $\chi^2$   
11 18.0  $p < 0.001$ ; Flare rate post V4 across IMiDs  $\chi^2$  8.8  $p = 0.03$ .  
12

13 <sup>5</sup> Self-reported over course of study; COVID-19 illness data missing for 2 SARDS and 1 IBD participant.  
14  
15  
16  
17  
18  
19  
20  
21  
22  
23  
24  
25  
26  
27  
28  
29  
30  
31  
32  
33  
34  
35  
36  
37  
38  
39  
40  
41  
42  
43  
44  
45  
46  
47  
48  
49  
50  
51  
52  
53  
54  
55  
56  
57  
58  
59  
60

For peer review only



Running title: COVID-19 vaccination in IMIDs

1  
2  
3 Samples of adequate quality were obtained following the first vaccine at 1 month (n=175) and 3  
4 months (n=44), following the second vaccine at 1 month (n=234) and 3 months (n=246),  
5  
6 following the third vaccine at 1 month (n=215) and following the fourth vaccine at 1 month  
7 (n=85). For 31 participants, DBS samples were of inadequate quality and a serum sample from  
8 the same day was substituted. In paired DBS and serum tests from 208 subjects,  
9 seroconversion and titers were highly concordant (Kendall's tau b correlation coefficient anti-  
10 RBD BAU/ml=0.93; anti-S1 BAU/ml= 0.92) (Supplementary Figure 3). Pre-pandemic sera were  
11 seronegative for anti-SarsCo-V2 antibodies.

12  
13  
14 Following the first vaccine, 60% of IMID participants seroconverted (Table 2). Following the  
15 second vaccine, seroconversion rates increased to 91% (p=0.1 across IMIDs for both anti-S1 and  
16 anti-RBD). The change in anti-S1 seropositivity between first and second vaccines was  
17 significant (anti-S1 all IMIDs Chi<sup>2</sup> 82.2 p<0.0001; IA Chi<sup>2</sup> 40.5 p<0.0001; SARDS Chi<sup>2</sup> 18.5  
18 p<0.0001; IBD Chi<sup>2</sup>16.9 p<0.0001; MS Chi<sup>2</sup> 4.1 p=0.04 and anti-RBD all IMIDs Chi<sup>2</sup> 55.1  
19 p<0.0001; IA Chi<sup>2</sup> 31.6 p<0.0001; SARDS Chi<sup>2</sup> 18.8 p<0.0001; IBD Chi<sup>2</sup> 8.4 p<0.01; MS Chi<sup>2</sup> 5.1  
20 p=0.02). Of the 21 participants who were seronegative after the second vaccine and had data  
21 following the third vaccine, 10 (42%) seroconverted after the third vaccine. Seroconversion  
22 rates for both anti-S1 and anti-RBD after the third and fourth vaccines were greater than 95%.

Running title: COVID-19 vaccination in IMIDs

Table 2 Seroconversion rates one month following each COVID-19 vaccine

| Seroconversion         | IA            | SARDs         | IBD            | MS            | All IMIDs       |
|------------------------|---------------|---------------|----------------|---------------|-----------------|
| Post V1                |               |               |                |               |                 |
| Anti-S1                | 14/47 (29.8%) | 21/47 (44.7%) | 33/48(68.8%)   | 23/33 (69.7%) | 91/175 (52.0%)  |
| Anti-RBD               | 18/47 (38.2%) | 22/47 (46.8%) | 40/48 (83.3%)  | 23/33 (69.7%) | 103/175 (58.9%) |
| Anti-NC                | 1/47 (2.1%)   | 0/48 (0%)     | 0/47 (0%)      | 1/33 (3%)     | 2/175 (1.1%)    |
| Post V2 <sup>1</sup> , |               |               |                |               |                 |
| Anti-S1 <sup>2</sup>   | 50/55 (90.9%) | 46/54 (85.1%) | 62/64 (96.9%)  | 53/61 (86.9%) | 214/234 (91.5%) |
| Anti-RBD <sup>3</sup>  | 50/55 (90.9%) | 47/54 (87.0%) | 63/64 (98.4%)  | 54/61 (88.5%) | 211/234 (90.2%) |
| Anti-NC                | 1/55 (1.8%)   | 0/57 (0%)     | 1/64 (1.6%)    | 1/61 (1.6%)   | 3/234 (1.3%)    |
| Post V3                |               |               |                |               |                 |
| Anti-S1                | 51/52 (98.1%) | 57/62 (91.9%) | 56/56 (100.0%) | 41/45 (91.1%) | 205/215 (95.3%) |
| Anti-RBD               | 51/52 (98.1%) | 56/62 (90.3%) | 56/56 (100.0%) | 41/45 (91.1%) | 204/215 (94.9%) |
| Anti-NC                | 2/52 (3.8%)   | 3/62 (4.8%)   | 2/56 (3.6%)    | 2/45 (4.4%)   | 9/215 (4.2%)    |
| Post V4                |               |               |                |               |                 |
| Anti-S1                | 31/32 (96.9%) | 21/23 (91.3%) | 27/27 (100%)   | 3/3 (100%)    | 82/85 (96.5%)   |
| Anti-RBD               | 31/32 (96.9%) | 21/23 (91.3%) | 27/27 (100%)   | 3/3 (100%)    | 82/85 (96.5%)   |
| Anti-NC                | 3/32 (9.4%)   | 4/23 (17.4%)  | 3/27 (11.1%)   | 0/3 (0.0%)    | 10/85 (11.8%)   |

IA=inflammatory arthritis; SARDs = systemic autoimmune rheumatic disease; IBD = inflammatory bowel disease; MS= multiple sclerosis; IMID = immune mediated inflammatory disease; V1 = first vaccine; V2 = second vaccine; V3= third vaccine; V4=fourth vaccine

<sup>1</sup> seroconversion V1 to v2 across IMIDs anti-S1 Chi<sup>2</sup> 82.2 p<0.0001; anti-RBD Chi<sup>2</sup> 55.1 p<0.0001

<sup>2</sup> change in anti-S1 seropositivity V1 to V2 IA Chi<sup>2</sup> 40.5 p<0.0001, SARDs Chi<sup>2</sup> 18.5 p<0.0001 IBD Chi<sup>2</sup>16.9 p<0.0001; MS Chi<sup>2</sup> 4.1 p=0.04

<sup>3</sup> change in anti-RBD seropositivity V1 to V2 IA Chi<sup>2</sup> 31.6 p<0.0001, SARDS Chi<sup>2</sup> 18.8 p<0.0001, IBD Chi<sup>2</sup> 8.4 p<0.01, MS Chi<sup>2</sup> 5.1 p=0.02.

Post-V2 anti-S1 seroconversion rates for IMIDs were lower compared to those of age and sex-matched controls (anti-S1 seropositive controls 363/370 (98.1%) vs IMIDs X<sup>2</sup> 14.5 p<0.0001) but similar for anti-NC (anti-NC seropositive controls 13/370 (3.5%) vs IMIDs Chisq-2.9 p=0.1).

Matched population-based estimates were not available for subsequent vaccinations.

Anti-RBD and anti-S1 IgG titres of those who seroconverted increased between the 1 month post-V1 and 1 month post-V2 time points for combined IMIDs and for each IMID individually

Running title: COVID-19 vaccination in IMiDs

1  
2  
3 (Figure 1) (p values all  $p < 0.0001$ ). Anti-RBD and anti-S1 titers declined by 3 months post-second  
4 vaccine (p values for combined IMiDs  $p < 0.0001$ ; SARDs  $p < 0.001$ ; IBD  $p < 0.001$ , IA  $p < 0.001$  and  
5 MS  $p < 0.001$ ) but increased 1 month post-third vaccine (p value all  $p < 0.0001$ ). Titers of anti-RBD  
6 and anti-Spike were similar between 1 month post-third vaccine and 1 month post-vaccine  
7 fourth vaccine. Within individuals, paired analysis of titers across visits yielded similar findings.  
8  
9

10  
11  
12  
13 Over the study, 99 (30.6%) IMiD participants received heterologous/mixed vaccines for their  
14 first two vaccines (Table 1). For those with one month post-V2 serology data, individuals  
15 receiving homologous vector vaccines had the lowest seroconversion rates and titers for both  
16 anti-RBD and anti-S1 responses. Individuals receiving either mRNA vaccine following a vector  
17 vaccine had comparable anti-RBD and anti-Spike titers as those receiving two mRNA vaccines  
18 (Figure 2). Anti-RBD and anti-S1 seropositivity and titers one month following the third vaccine  
19 were similar among individuals receiving different combinations of vaccines for their first two  
20 vaccines (Supplemental Table 2, Supplemental Figure 4).  
21  
22  
23  
24  
25  
26  
27

28 Participants over age 65 years, diagnosed with MS, or taking biologics, were less likely to  
29 seroconvert by the second vaccine in multivariable models (Table 3). Vaccine mix (vector-mRNA  
30 versus mRNA-mRNA) did not impact seroconversion when included in the regression models.  
31  
32 Most of the 29 individuals who did not seroconvert after V2 were taking immunosuppressives  
33 (mycophenolate  $n=8$ ; methotrexate  $n=2$ , azathioprine  $n=2$ ) or biologics (B cell targeting  
34 currently or previously  $n=12$ , anti-TNF  $n=4$ , other  $n=1$ ) (Supplementary Table 3).  
35  
36  
37  
38  
39  
40  
41  
42  
43  
44  
45  
46  
47  
48  
49  
50  
51  
52  
53  
54  
55  
56  
57  
58  
59  
60

Running title: COVID-19 vaccination in IMIDs

Table 3 Clinical variables associated with seroconversion one month following second vaccine .  
RBD = Receptor binding domain; S1 = Spike protein; Ref = reference category; NA = not able to compute.

|                       | Post second vaccine<br>OR (95% CI) | P value |
|-----------------------|------------------------------------|---------|
| RBD seroconversion    |                                    |         |
| Sex                   |                                    |         |
| Male                  | Ref                                | 1.0     |
| Female                | 1.0 (0.21-4.71)                    |         |
| Age                   |                                    |         |
| >65 years             | Ref                                | 0.002   |
| ≤ 65 years            | 7.4 (2.04-27.06)                   |         |
| IMID                  |                                    |         |
| IBD                   | Ref                                | <0.001  |
| RA                    | 0.2 (0.02-2.65)                    |         |
| SARDs                 | 0.05 (0.003-0.79)                  |         |
| MS                    | 0.009 (0.001-0.13)                 |         |
| Immune therapy        |                                    |         |
| None                  | Ref                                | 0.004   |
| Other immunomodulator | NA                                 |         |
| Immunosuppressant     | 0.03 (0.002-0.33)                  |         |
| Biologic              | 0.02 (0.002-0.16)                  |         |
| S1 seroconversion     |                                    |         |
| Sex                   |                                    |         |
| Male                  | Ref                                | 0.85    |
| Female                | 1.1 (0.29-4.52)                    |         |
| Age                   |                                    |         |
| >65 years             | Ref                                | 0.02    |
| ≤ 65 years            | 3.9 (1.29-11.62)                   |         |
| IMID                  |                                    |         |
| IBD                   | Ref                                | <0.001  |
| RA                    | 0.5 (0.07-3.02)                    |         |
| SARDs                 | 0.1 (0.01-0.91)                    |         |
| MS                    | 0.03 (0.003-0.20)                  |         |
| Immune therapy        |                                    |         |
| None                  | Ref                                | 0.01    |
| Other immunomodulator | NA                                 |         |
| Immunosuppressant     | 0.06 (0.006-0.51)                  |         |
| Biologic              | 0.04 (0.007-0.27)                  |         |

Running title: COVID-19 vaccination in IMIDs

1  
2  
3 Twenty-five patients were seropositive for anti-NC antibodies on at least one visit (8 IA, 8  
4 SARDs, 3 MS, 6 IBD) and for 4 of these individuals, seropositivity persisted with declining titers  
5 across consecutive visits spanning 3 to 6 months. All but one MS participant were also anti-RBD  
6 and anti-S1 seropositive. The anti-NC titers obtained closest to COVID-19 infection (i.e. the first  
7 positive sample) were lower than anti-S1 or anti-RBD titers at the same visit [median titer (25%  
8 and 75% quartile) BAU/ml first positive test anti-NC 28.5 (18.0, 62.2); anti-S1 12443.1 (7027.5,  
9 27143.0); anti-RBD 13851.5 (6244.87, 35743.5)  $p < 0.001$  for both anti-S1 and anti RBD] and  
10 across all visits [ median (25% and 75% quartile) BAU/ml anti-S1 1416.3 (470.9, 4090.6) anti-  
11 RBD 1230.1 (284.4, 3747.3)  $p < 0.001$  for both anti-S1 and anti-RBD]. Anti-RBD and anti-S1 titers  
12 were higher in anti-NC positive compared to anti-NC negative samples [median (range; IQR)  
13 anti-RBD 11755.3 (20373.1) vs 1248.0(27-78936.2; 53278.7); anti-Spike 11254.4 (77.3-68157.0;  
14 15352.6) vs 1313.1 (37.4-87401.3; 3106.6)]. Although the rates of anti-NC positivity increased  
15 over the course of the study, anti-NC titers did not vary by vaccine status nor by date tested  
16 (Table 2, Supplementary Figure 5).  
17  
18  
19  
20  
21  
22  
23  
24  
25  
26  
27  
28

29 Most participants reported no COVID-19 infection symptoms during the study, including 6  
30 individuals who tested seropositive for anti-NC antibodies, whereas 34.6% of participants  
31 reported mild symptoms consistent with COVID-19 infection but did not have community-based  
32 confirmatory testing by either polymerase chain testing before Dec 2021 or self-administered  
33 testing after Dec 2021. All COVID-19 infections with positive community-based testing were  
34 also anti-NC positive. Only two confirmed COVID-19 infections required hospitalization. Both  
35 had received 3 vaccines and had moderate levels of anti-NC (69.4 and 22.8 BAU/ml). (Table 1,  
36 Supplementary Figure 6)  
37  
38  
39  
40  
41  
42  
43  
44

45 Self-reported disease activity/status scores were similar across visits for each IMID (Figure 3).  
46 Rates of moderate or severe self-reported IMID flares were similar across vaccines and IMIDs.  
47 (Table 1).  
48  
49  
50  
51  
52  
53  
54  
55  
56  
57  
58  
59  
60

Running title: COVID-19 vaccination in IMIDs

## Discussion

This single center cohort study evaluated the safety and immunogenicity of SARS-CoV-2 vaccines in IMIDs and confirmed relative safety with no increase in IMID disease activity despite self-reported disease flare rates of 14% following three vaccinations. Fewer than two-thirds seroconverted after the first vaccine. Seroconversion rates differed by vaccine type with higher titres of anti-RBD and anti-Spike responses generated by mRNA vaccines compared to the available vector vaccine. Individuals who received an initial vector vaccine followed by a mRNA vaccine had vaccine induced titers that were comparable to those following a homologous mRNA vaccine course and were higher than those who received homologous vector vaccines. Anti-SARS-CoV-2 antibody titers declined 3 months after the second vaccine but improved after the third and fourth vaccines. Most individuals who did not produce adequate humoral responses to the vaccine were taking immunosuppressants or biologics.

Our findings are consistent with emerging clinical trial and cohort data from the general population and other immunocompromised groups. Prior studies of rheumatic disease flare post-COVID-19 vaccination have produced mixed results however, most found no major concerns<sup>7</sup>. Data for IBD and MS are also reassuring<sup>23 24</sup>. Several studies have found lower seroconversion rates and anti-SARS-CoV-2 titers in IMIDs compared to the general population<sup>25 26</sup>. While older age plays a role, the primary reason for reduced responses appears due to medication use with the greatest impact from biologics, especially B-cell depleting therapies, fingolimod, anti-tumor necrosis factor agents, and Janus kinase inhibitors, and with DMARDs such as mycophenolate and methotrexate. Hydroxychloroquine does not impair vaccine responses. Proposed strategies to optimize responses for patients on these medications include holding medication around the time of vaccination and delaying vaccination following infusion of B-cell targeted therapies<sup>27 28</sup>. For B cell therapies, humoral immune responses remain suboptimal even after third doses especially for individuals with low pre-vaccination cell counts<sup>29-31</sup>. Reassuringly, T cell responses are induced although possibly impaired<sup>26 31 32</sup>.

Heterologous vaccine administration increased as vaccine availability and data on safety and immunogenicity evolved, thereby allowing evaluation of the role of homologous versus

Running title: COVID-19 vaccination in IMIDs

1  
2  
3 heterologous vaccine administration for people with IMIDs. In the general population, clinical  
4 trials and cohort studies of mixing vaccine types that compared homologous vector,  
5 homologous mRNA and heterologous vector/mRNA vaccine courses observed greater immune  
6 responses (humoral and cellular) with mRNA vaccines than vector vaccines and that in  
7 individuals receiving a vector vaccine first, a mRNA vaccine improved vaccine responses to  
8 levels comparable to those of the homologous mRNA vaccines<sup>12-14 33</sup>. Our observations in IMIDs  
9 confirm that second, and at least third vaccination courses are needed to generate acceptable  
10 humoral immunogenicity and that mRNA vaccines can overcome limited responses to vector  
11 vaccines.  
12  
13  
14  
15  
16  
17  
18  
19

20 The clinical findings of this report reflect data collected during intermittent public health  
21 mandated societal restrictions, before and during the early period when the Omicron variant  
22 was circulating in our region, and before bivalent vaccines were available<sup>11</sup>. Over one-third  
23 reported mild symptoms or were suspected to have had COVID-19 illness but less than 10% had  
24 confirmed COVID-19 infection. Despite complete vaccination, infection and concerning  
25 symptoms increased as public health restrictions were relaxed, the prevalence of SARS-CoV-2  
26 virus increased, and new variants of concern emerged. This emphasizes the need for ongoing  
27 COVID-19 surveillance to inform personal health practices given the real concerns expressed by  
28 many people with IMIDs, even those who are fully vaccinated. Recent studies have described  
29 reduced sensitivity of the anti-NC assay following vaccination that is only partially explained by  
30 viral load.<sup>34</sup> In this study, all participants with COVID-19 infection confirmed with community  
31 based testing were also anti-NC positive and while the number of anti-NC +ve participants  
32 increased over the study, we did not see any difference in anti-NC IgG levels with number of  
33 vaccines or by calendar month.  
34  
35  
36  
37  
38  
39  
40  
41  
42  
43  
44  
45

46 We acknowledge limitations of this work. Our sample size was relatively small for each IMID;  
47 however, we have collected extensive patient-reported data combined with biologic samples  
48 from individuals representing four common IMID groups, allowing cross-disease and cross-  
49 specialty comparisons which are not widely reported. We assessed IMID disease activity using  
50 validated patient self-reported disease specific indices and flare questions although these  
51 questionnaires can be subject to recall bias. Ideally patient reported IMID activity would be  
52  
53  
54  
55  
56  
57  
58  
59  
60

Running title: COVID-19 vaccination in IMIDs

1  
2  
3 supplemented with clinician assessed measures however both patient preferences and COVID-  
4  
5 19 pandemic travel restrictions impacted the feasibility of in person clinical assessments for all  
6  
7 participants. Self reported of disease activity/state measures correlate with clinical assessment  
8  
9 measures<sup>19 35-37</sup>. As expected for these IMIDs, our population was predominantly female thus  
10  
11 we lack power to detect sex-based differences in our outcomes and there is uncertainty as to  
12  
13 how they would reflect a male predominant cohort. We focused on humoral vaccine induced  
14  
15 immunogenicity using antibody seropositivity and titres as surrogates for vaccine induced  
16  
17 protection. Antibody binding titers have been shown to correlate with neutralizing and cellular  
18  
19 responses which in turn correlate with vaccine efficacy<sup>38</sup>. Further work is needed to evaluate  
20  
21 the neutralization capacity of vaccine induced antibodies to SARS-COV-2 and emerging variants  
22  
23 of concern including Omicron. We did not evaluate cellular immune responses yet these are  
24  
25 critical for long term anti-viral protection especially for individuals without robust antibody  
26  
27 responses. Additional studies are needed to evaluate if there are important differences across  
28  
29 mRNA vaccines and vaccine intervals for optimal protection against variants of concern to  
30  
31 inform recommendations for additional vaccinations in IMIDs. Importantly, it is still unclear  
32  
33 what level of humoral or cellular immunogenicity is optimal to protect IMIDs against serious  
34  
35 COVID-19 infection although population-based vaccine efficacy data are emerging for some  
36  
37 immunocompromised groups<sup>39</sup>.

38  
39 We conclude that most individuals with IMID can safely receive COVID-19 vaccines without risk  
40  
41 of disease flare. At least two doses that include a mRNA vaccine, either homologous or mixed  
42  
43 vaccine types are needed to generate humoral immunity comparable to the general population.  
44  
45 The observed decline in humoral responses support the use of third and subsequent vaccine  
46  
47 doses for IMIDs. These data can be used to direct vaccine policies in countries where vaccine  
48  
49 rates have been lagging or where supply has been limited.  
50  
51

52  
53 Disclaimer: The results and conclusions are those of the authors and no official endorsement by  
54  
55 University of Manitoba, Manitoba Shared Health, the Public Health Agency of Canada or  
56  
57 Research Manitoba is intended nor should be inferred  
58  
59



Running title: COVID-19 vaccination in IMIDs

Acknowledgements: We acknowledge the technical expertise of the NLHRS including A. Harris, R.Fabia, K.Cachero, H.Ellis, S.Simon, K.Peladeau and J.Walker, and the assistance of M. Moyen, M. Sevilla, S. Nanayakkara, and J. Remple.

Author contributions:

CA Hitchon: Conceptualization, Funding acquisition, Resources (recruited participants), Data curation Formal analysis (clinical and serologic data), writing- original draft, writing- review and editing

C Mesa: Investigation (Conducted SARS-CoV-2 assays) Formal analysis (analysis of anti-SARS-CoV-2 antibody data), Data curation writing- review and editing

C Bernstein: Conceptualization, Funding acquisition, Resources (recruited participants), writing review and editing

RA Marrie: Conceptualization, Funding acquisition, Resources (recruited participants), writing review and editing

C Card: writing review and editing

S O'Brian: Resources (Provided data for controls) writing review and editing

J Kim: Conceptualization, Funding acquisition, Resources (anti-SARS-CoV-2 antibody assays) conducted and interpreted anti-SARSCoV2 antibody data. writing review and editing

All authors contributed to critical review of manuscript.

Data sharing statement: Limited deidentified data from consenting participants will be made available to qualified investigators for research purposes consistent with those of the original study documents and participant consent following submission of a formal proposal, and approval by the study team, the University of Manitoba, and Shared Health and completion of signed data access agreements.

Running title: COVID-19 vaccination in IMIDs

### Disclosures

CH: unrelated grant funding from Pfizer; Advisory board for Astra-Zeneca Canada for unrelated product, unrelated research funds from Research Manitoba, Health Sciences Center foundation, International League of Associations for Rheumatology, unrelated educational funds from the Royal College of Physicians and Surgeons of Canada.

RAM: Ruth Ann Marrie receives research funding from: CIHR, Research Manitoba, Multiple Sclerosis Society of Canada, Multiple Sclerosis Scientific Foundation, Crohn's and Colitis Canada, National Multiple Sclerosis Society, the CMSC, the Arthritis Society, Brain Canada, and US Department of Defense. She is a co-investigator on a study funded in part by Biogen Idec and Roche Canada. She is supported by the Waugh Family Chair in Multiple Sclerosis.

CNB: Dr Bernstein is supported by the Bingham Chair in Gastroenterology. Dr. Bernstein has served on advisory Boards for AbbVie Canada, Amgen Canada, Bristol Myers Squibb Canada, Roche Canada, Janssen Canada, Sandoz Canada, Takeda Canada, and Pfizer Canada; Consultant for Mylan Pharmaceuticals and Takeda; Educational grants from Abbvie Canada, Pfizer Canada, Takeda Canada, and Janssen Canada. Speaker's panel for Abbvie Canada, Janssen Canada, Pfizer Canada, and Takeda Canada. Received research funding from Abbvie Canada, Bristol Myers Squibb Canada, Sandoz Canada and Pfizer Canada.

CM: none

CC: Receives grant funding from PHAC and CITF through internal research funding streams at PHAC

SOB: none

JK: Receives grant funding from PHAC through internal research funding streams at PHAC

Study Funding statement: Study funding from Research Manitoba, Public Health Agency of Canada funding for the Kim lab

Role of funding sources: The study sponsors had no role in study design, data collection, analysis, interpretation, writing, or in the decision to submit the manuscript.

Ethics statement: All subjects provided informed consent. The study was approved by the University of Manitoba Health Research Ethics Board (HS24647-H2021-005), Manitoba Shared Health (SH2021:009), and the Health Canada and Public Health Agency of Canada Research Ethics Board (REB 2021-018P).

Running title: COVID-19 vaccination in IMIDs

- 1 Krammer F. SARS-CoV-2 vaccines in development. *Nature* 2020;586(7830):516-27. doi: 10.1038/s41586-020-2798-3 [published Online First: 2020/09/24]
- 2 Baden LR, El Sahly HM, Essink B, et al. Efficacy and Safety of the mRNA-1273 SARS-CoV-2 Vaccine. *The New England journal of medicine* 2020 doi: 10.1056/NEJMoa2035389 [published Online First: 2020/12/31]
- 3 Polack FP, Thomas SJ, Kitchin N, et al. Safety and Efficacy of the BNT162b2 mRNA Covid-19 Vaccine. *The New England journal of medicine* 2020;383(27):2603-15. doi: 10.1056/NEJMoa2034577 [published Online First: 2020/12/11]
- 4 Falsey AR, Sobieszczyk ME, Hirsch I, et al. Phase 3 Safety and Efficacy of AZD1222 (ChAdOx1 nCoV-19) Covid-19 Vaccine. *The New England journal of medicine* 2021;385(25):2348-60. doi: 10.1056/NEJMoa2105290 [published Online First: 2021/09/29]
- 5 El-Gabalawy H, Guenther LC, Bernstein CN. Epidemiology of immune-mediated inflammatory diseases: incidence, prevalence, natural history, and comorbidities. *The Journal of rheumatology Supplement* 2010;85:2-10. doi: 10.3899/jrheum.091461 [published Online First: 2011/02/02]
- 6 Maddur MS, Vani J, Lacroix-Desmazes S, et al. Autoimmunity as a predisposition for infectious diseases. *PLoS pathogens* 2010;6(11):e1001077. doi: 10.1371/journal.ppat.1001077 [published Online First: 2010/11/17]
- 7 Grainger R, Kim AHJ, Conway R, et al. COVID-19 in people with rheumatic diseases: risks, outcomes, treatment considerations. *Nature reviews Rheumatology* 2022;18(4):191-204. doi: 10.1038/s41584-022-00755-x [published Online First: 2022/02/27]
- 8 Conway R, Grimshaw AA, Konig MF, et al. SARS-CoV-2 Infection and COVID-19 Outcomes in Rheumatic Diseases: A Systematic Literature Review and Meta-Analysis. *Arthritis & rheumatology (Hoboken, NJ)* 2022;74(5):766-75. doi: 10.1002/art.42030 [published Online First: 2022/03/28]
- 9 Schiavetti I, Ponzano M, Signori A, et al. Severe outcomes of COVID-19 among patients with multiple sclerosis under anti-CD-20 therapies: A systematic review and meta-analysis. *Multiple sclerosis and related disorders* 2022;57:103358. doi: 10.1016/j.msard.2021.103358 [published Online First: 2021/11/05]
- 10 Tripathi K, Godoy Brewer G, Thu Nguyen M, et al. COVID-19 and Outcomes in Patients With Inflammatory Bowel Disease: Systematic Review and Meta-Analysis. *Inflammatory bowel diseases* 2022;28(8):1265-79. doi: 10.1093/ibd/izab236
- 11 Aboulatta L, Kowalec K, Delaney J, et al. Trends of COVID-19 incidence in Manitoba and public health measures: March 2020 to February 2022. *BMC Res Notes* 2022;15(1):162. doi: 10.1186/s13104-022-06049-5 [published Online First: 2022/05/10]
- 12 Borobia AM, Carcas AJ, Pérez-Olmeda M, et al. Immunogenicity and reactogenicity of BNT162b2 booster in ChAdOx1-S-primed participants (CombiVacs): a multicentre, open-label, randomised, controlled, phase 2 trial. *Lancet (London, England)* 2021;398(10295):121-30. doi: 10.1016/s0140-6736(21)01420-3 [published Online First: 2021/06/29]
- 13 Barros-Martins J, Hammerschmidt SI, Cossmann A, et al. Immune responses against SARS-CoV-2 variants after heterologous and homologous ChAdOx1 nCoV-19/BNT162b2 vaccination. *Nature medicine* 2021;27(9):1525-29. doi: 10.1038/s41591-021-01449-9 [published Online First: 2021/07/16]
- 14 Schmidt T, Klemis V, Schub D, et al. Immunogenicity and reactogenicity of heterologous ChAdOx1 nCoV-19/mRNA vaccination. *Nature medicine* 2021;27(9):1530-35. doi: 10.1038/s41591-021-01464-w [published Online First: 2021/07/28]
- 15 Information ClfH. Guidance on the Use of Standards for Race-Based and Indigenous Identity Data Collection and Health Reporting in Canada. . Ottawa, ON, 2022.

Running title: COVID-19 vaccination in IMIDs

16. Johnson TM, Michaud K, England BR. Measures of Rheumatoid Arthritis Disease Activity. *Arthritis care & research* 2020;72 Suppl 10:4-26. doi: 10.1002/acr.24336 [published Online First: 2020/10/23]
17. Arora S, Isenberg DA, Castrejon I. Measures of Adult Systemic Lupus Erythematosus: Disease Activity and Damage. *Arthritis care & research* 2020;72 Suppl 10:27-46. doi: 10.1002/acr.24221 [published Online First: 2020/10/23]
18. Witges K, Sexton K, Graff LA, et al. What Is a Flare? The Manitoba Living With IBD Study. *Inflammatory bowel diseases* 2021 doi: 10.1093/ibd/izab192 [published Online First: 2021/08/05]
19. Sexton KA, Walker JR, Targownik LE, et al. The Inflammatory Bowel Disease Symptom Inventory: A Patient-report Scale for Research and Clinical Application. *Inflammatory bowel diseases* 2019;25(8):1277-90. doi: 10.1093/ibd/izz038 [published Online First: 2019/03/29]
20. Kurtzke JF. Rating neurologic impairment in multiple sclerosis: an expanded disability status scale (EDSS). *Neurology* 1983;33(11):1444-52. doi: 10.1212/wnl.33.11.1444 [published Online First: 1983/11/01]
21. Harris PA TR, Thielke R, Payne J, Gonzalez N, Conde JD. Research electronic data capture (REDCap) – A metadata-driven methodology and workflow process for providing translational research informatics support *J Biomed Inform* 2009 2009;42(2):377-81.
22. Cholette F, Mesa C, Harris A, et al. Dried blood spot specimens for SARS-CoV-2 antibody testing: A multi-site, multi-assay comparison. *PloS one* 2021;16(12):e0261003. doi: 10.1371/journal.pone.0261003 [published Online First: 2021/12/08]
23. Botwin GJ, Li D, Figueiredo J, et al. Adverse Events After SARS-CoV-2 mRNA Vaccination Among Patients With Inflammatory Bowel Disease. *The American journal of gastroenterology* 2021;116(8):1746-51. doi: 10.14309/ajg.000000000001342 [published Online First: 2021/05/29]
24. Ciampi E, Uribe-San-Martin R, Soler B, et al. Safety and humoral response rate of inactivated and mRNA vaccines against SARS-CoV-2 in patients with Multiple Sclerosis. *Multiple sclerosis and related disorders* 2022;59:103690. doi: 10.1016/j.msard.2022.103690 [published Online First: 2022/02/20]
25. Jena A, Mishra S, Deepak P, et al. Response to SARS-CoV-2 vaccination in immune mediated inflammatory diseases: Systematic review and meta-analysis. *Autoimmunity reviews* 2022;21(1):102927. doi: 10.1016/j.autrev.2021.102927 [published Online First: 2021/09/03]
26. Tortorella C, Aiello A, Gasperini C, et al. Humoral- and T-Cell-Specific Immune Responses to SARS-CoV-2 mRNA Vaccination in Patients With MS Using Different Disease-Modifying Therapies. *Neurology* 2022;98(5):e541-e54. doi: 10.1212/wnl.0000000000013108 [published Online First: 2021/11/24]
27. Skaria TG, Sreerakash A, Umesh R, et al. Withholding methotrexate after vaccination with ChAdOx1 nCov19 in patients with rheumatoid or psoriatic arthritis in India (MIVAC I and II): results of two, parallel, assessor-masked, randomised controlled trials. *The Lancet Rheumatology* 2022;4(11):e755-e64. doi: 10.1016/S2665-9913(22)00228-4 [published Online First: 20220912]
28. Curtis JR, Johnson SR, Anthony DD, et al. American College of Rheumatology Guidance for COVID-19 Vaccination in Patients With Rheumatic and Musculoskeletal Diseases: Version 3. *Arthritis & rheumatology (Hoboken, NJ)* 2021;73(10):e60-e75. doi: 10.1002/art.41928 [published Online First: 2021/08/05]
29. Bajwa HM, Novak F, Nilsson AC, et al. Persistently reduced humoral and sustained cellular immune response from first to third SARS-CoV-2 mRNA vaccination in anti-CD20-treated multiple sclerosis patients. *Multiple sclerosis and related disorders* 2022;60:103729. doi: 10.1016/j.msard.2022.103729 [published Online First: 2022/03/26]

Running title: COVID-19 vaccination in IMiDs

- 1
  - 2
  - 3
  - 4
  - 5
  - 6
  - 7
  - 8
  - 9
  - 10
  - 11
  - 12
  - 13
  - 14
  - 15
  - 16
  - 17
  - 18
  - 19
  - 20
  - 21
  - 22
  - 23
  - 24
  - 25
  - 26
  - 27
  - 28
  - 29
  - 30
  - 31
  - 32
  - 33
  - 34
  - 35
  - 36
  - 37
  - 38
  - 39
  - 40
  - 41
  - 42
  - 43
  - 44
  - 45
  - 46
  - 47
  - 48
  - 49
  - 50
  - 51
  - 52
  - 53
  - 54
  - 55
  - 56
  - 57
  - 58
  - 59
  - 60
30. Stefanski AL, Rincon-Arevalo H, Schrezenmeier E, et al. B cell numbers predict humoral and cellular response upon SARS-CoV-2 vaccination among patients treated with rituximab. *Arthritis & rheumatology (Hoboken, NJ)* 2021 doi: 10.1002/art.42060 [published Online First: 2021/12/29]
31. Jyssum I, Kared H, Tran TT, et al. Humoral and cellular immune responses to two and three doses of SARS-CoV-2 vaccines in rituximab-treated patients with rheumatoid arthritis: a prospective, cohort study. *The Lancet Rheumatology* 2022;4(3):e177-e87. doi: 10.1016/S2665-9913(21)00394-5 [published Online First: 20211223]
32. Apostolidis SA, Kakara M, Painter MM, et al. Cellular and humoral immune responses following SARS-CoV-2 mRNA vaccination in patients with multiple sclerosis on anti-CD20 therapy. *Nature medicine* 2021;27(11):1990-2001. doi: 10.1038/s41591-021-01507-2 [published Online First: 2021/09/16]
33. Stuart ASV, Shaw RH, Liu X, et al. Immunogenicity, safety, and reactogenicity of heterologous COVID-19 primary vaccination incorporating mRNA, viral-vector, and protein-adjuvant vaccines in the UK (Com-COV2): a single-blind, randomised, phase 2, non-inferiority trial. *Lancet (London, England)* 2022;399(10319):36-49. doi: 10.1016/s0140-6736(21)02718-5 [published Online First: 2021/12/10]
34. Follmann D, Janes HE, Buhule OD, et al. Antinucleocapsid Antibodies After SARS-CoV-2 Infection in the Blinded Phase of the Randomized, Placebo-Controlled mRNA-1273 COVID-19 Vaccine Efficacy Clinical Trial. *Annals of internal medicine* 2022;175(9):1258-65. doi: 10.7326/M22-1300 [published Online First: 20220705]
35. Pincus T, Yazici Y, Bergman MJ. RAPID3, an index to assess and monitor patients with rheumatoid arthritis, without formal joint counts: similar results to DAS28 and CDAI in clinical trials and clinical care. *Rheumatic diseases clinics of North America* 2009;35(4):773-8, viii. doi: 10.1016/j.rdc.2009.10.008 [published Online First: 2009/12/08]
36. Svenungsson E, Gunnarsson I, Illescas-Bäckelin V, et al. Quick Systemic Lupus Activity Questionnaire (Q-SLAQ): a simplified version of SLAQ for patient-reported disease activity. *Lupus Sci Med* 2021;8(1) doi: 10.1136/lupus-2020-000471
37. Koch MW, Mostert JP, Wolinsky JS, et al. Comparison of the EDSS, Timed 25-Foot Walk, and the 9-Hole Peg Test as Clinical Trial Outcomes in Relapsing-Remitting Multiple Sclerosis. *Neurology* 2021;97(16):e1560-e70. doi: 10.1212/wnl.0000000000012690 [published Online First: 2021/08/27]
38. Feng S, Phillips DJ, White T, et al. Correlates of protection against symptomatic and asymptomatic SARS-CoV-2 infection. *Nature medicine* 2021;27(11):2032-40. doi: 10.1038/s41591-021-01540-1 [published Online First: 2021/10/01]
39. Widdifield J, Kwong JC, Chen, S, Eder L, Benchimol EI, Kaplan GG, Hitchon CA, Aviña-Zubieta JA, Lacaille D, Chung H, Bernatsky B. Vaccine Effectiveness against SARS-CoV-2 infection and severe outcomes among individuals with Immune-Mediated Inflammatory Diseases tested between March 1 and November 22, 2021: A population-based analysis. *Lancet Rheumatology* 2022;in press

Running title: COVID-19 vaccination in IMIDs

## List of Tables and Figures

Table 1 Demographics, vaccines administered, self reported IMID flare, and COVID-19 history of participants

IA=inflammatory arthritis; SARDs = systemic autoimmune rheumatic disease; IBD = inflammatory bowel disease; MS= multiple sclerosis; IMID = immune mediated inflammatory disease; FT=full time; PT= part time; BMI=body mass index; JAKi= janus kinase inhibitor; TNF= tumor necrosis factor inhibitor; BNT= BNT162b2 vaccine V1= first vaccine; V2 = second vaccine, V3 = third vaccine; V4 = fourth vaccine; NA=not available, PCR= polymerase chain reaction; IQR = interquartile range

<sup>1</sup> IMID treatment based on most aggressive combination if on multiple agents. 1 RA subject on only prednisone monotherapy. Medication data missing for 2 SARDs subjects

<sup>2</sup> cardiovascular disease includes ischemic heart disease, congestive heart failure, valvular heart disease peripheral vascular disease stroke or transient ischemic attack or hypertension; respiratory disease includes asthma or chronic obstructive pulmonary disease, other endocrine includes thyroid disease, hypercholesterolemia

<sup>3</sup> Vaccine data available for V1 N=326 (77 IA, 84 SARDs, 72 MS 93 IBD); V2 N=324 (77IA, 83 SARDs, 72 MS 92 IBD); V3 N=281 (76 IA, 74 SARDs, 63 MS, 74 IBD) V4 N=128 (35 IA, 37 SARDs 39 IBD 17 MS).

<sup>4</sup> Flare assessed by the following questions: IA: "Are you having a flare? SARDs: "In the past 3 months have you had a disease flare (A flare is when your disease gets worse)? Yes moderate or severe flare; IBD: In the past 6 months my disease has been: Constantly active, giving me symptoms every day, or often active, giving me symptoms most days or sometimes active, giving me symptoms on some days (for instance 1-2 days/week); MS Do you feel there has been a change in your MS since your last visit? "My multiple sclerosis is much worse and in a flare"

Flare rate across IMIDs 1 month after any vaccine  $\chi^2$  36.5  $p < 0.0001$ ; Flare rate post V1 across IMIDs non-significant. Flare rate post V2 across IMIDs  $\chi^2$  12.4  $p = 0.006$ ; Flare rate post V3 across IMIDs  $\chi^2$  18.0  $p < 0.001$ ; Flare rate post V4 across IMIDs  $\chi^2$  8.8  $p = 0.03$ .

<sup>5</sup> Self-reported over course of study; COVID-19 illness data missing for 2 SARDs and 1 IBD participant.

Running title: COVID-19 vaccination in IMIDs

Table 2 Seroconversion rates one month following each COVID-19 vaccine

IA=inflammatory arthritis; SARDs = systemic autoimmune rheumatic disease; IBD = inflammatory bowel disease; MS= multiple sclerosis; IMID = immune mediated inflammatory disease; V1 = first vaccine; V2 = second vaccine; V3= third vaccine; V4=fourth vaccine

<sup>1</sup> seroconversion V1 to v2 across IMIDs anti-S1 Chi<sup>2</sup> 82.2 p<0.0001; anti-RBD Chi<sup>2</sup> 55.1 p<0.0001

<sup>2</sup> change in anti-S1 seropositivity V1 to V2 IA Chi<sup>2</sup> 40.5 p<0.0001, SARDs Chi<sup>2</sup> 18.5 p<0.0001 IBD Chi<sup>2</sup>16.9 p<0.0001; MS Chi<sup>2</sup> 4.1 p=0.04

<sup>3</sup> change in anti-RBD seropositivity IA Chi<sup>2</sup> 31.6 p<0.0001, SARDS Chi<sup>2</sup> 18.8 p<0.0001, IBD Chi<sup>2</sup> 8.4 p<0.01, MS Chi<sup>2</sup> 5.1 p=0.02.

Table 3 Clinical variables associated with seroconversion.

RBD = Receptor binding domain; S1 = Spike protein; Ref = reference category; NA = not able to compute.

Figure 1 Titers of anti- spike and anti-receptor binding domain IgG levels following first, second third and fourth vaccination.

A. All IMIDs B. IA C. SARDs D. IBD E. MS

Data for seroconverters only. IgG levels natural log transformed. IMIDs=immune mediated inflammatory disease; IA = inflammatory arthritis; SARDs = systemic autoimmune rheumatic disease; IBD = inflammatory bowel disease; MS = multiple sclerosis; S1= spike; RBD= receptor binding domain; V1 = first vaccine; V2 = second vaccine; V3= third vaccine. Unadjusted p values \* p<0.0001, \*\* p≤0.001, \*\*\* p≤0.00, \*\*\*\* p<0.05

Figure 2 Titers of anti- spike and anti-receptor binding domain IgG levels 1 month following second vaccination by vaccine mixture. A log anti-RBD B log anti-Spike

Data for seroconverters only. IgG levels natural log transformed. S1= spike; RBD= receptor binding domain BNT= BNT162b2, Unadjusted p values \* p<0.01

Running title: COVID-19 vaccination in IMIDs

Figure 3 Disease activity before and after each vaccine

A Inflammatory arthritis B Systemic autoimmune rheumatic disease C Inflammatory bowel disease D Multiple Sclerosis

RAPID-3 Routine Assessment of Patient Index Data 3; SLAQ Systemic lupus activity questionnaire IBDSI-SF Inflammatory bowel disease symptom inventory – short form; EDSS Expanded disability status scale. V1 vaccine one; V2 vaccine two; V3 vaccine 3; V4 vaccine 4; mo = month(s).

## Supplementary Tables and Figures

Supplementary Table 1 Categorization of IMID treatments

Supplementary Table 2 Seroconversion rates based on vaccine mixture between first and second vaccinations

RBD= receptor binding domain; BNT= BNT162b2

Homologous (any) versus heterologous (any) vaccine combination anti-Spike  $\chi^2$  10.6 Fisher exact test  $p < 0.0001$ ; anti-RBD  $\chi^2$  8.0 Fishers exact test  $p = 0.004$ ;

Across all vaccine combinations anti-Spike  $\chi^2$  20.1 ( $p = 0.001$ ); anti-RBD  $\chi^2 = 13.7$  ( $p = 0.02$ )

Supplementary Table 3 Clinical features of IMIDs not seroconverting after 2 vaccinations

IA= inflammatory arthritis; SARDs= Systemic autoimmune rheumatic disease; MS= multiple sclerosis; IBD= inflammatory bowel disease M=male; F=female

Supplementary Figure 1 Covid-19 vaccination timeline

HCW= health care workers; LTCR= long term care residents, GP= general population, IMID=immune mediated inflammatory disease; Bars indicate time when study participants (IMIDs) received vaccine. Light grey bars indicate time of first vaccine (V1); dark grey bars indicate time of second vaccine (V2).



Running title: COVID-19 vaccination in IMIDs

Supplementary Figure 2 Recruitment and sample acquisition chart

Supplementary Figure 3 Correlation between assays performed using serum and dried blood spot samples.

A. log Anti-S1 B log anti-RBD, C. anti-S1 BAU/ml D anti RBD BAU/ml (Kendalls tau b correlation co-efficient anti-S1 BAU/ml= 0.92; anti-RBD BAU/ml=0.93)

Supplementary Figure 4 Titers of anti- spike and anti-receptor binding domain IgG levels 1 month following third vaccination by first and second vaccine mixture.

A log anti-RBD B log anti-Spike all comparisons p=NS

Supplementary Figure 5 Anti-Nucleocapsid antibody levels and correlations with Anti-Spike and Anti-Receptor Binding Domain antibodies

A. Anti-NC titer by Calendar month/year B. Anti-NC titer by Study visit C. Correlation of anti-NC anti RBD and anti-S1 titers in samples seropositive for anti-NC D. Correlation of anti-RBD and anti-S1 titers in all seropositive samples.

NC = nucleocapsid S = Spike; RBD = receptor binding domain; ln = natural log. V1 = vaccine 1; V2 = vaccine 2; V3 = vaccine 3; V4= vaccine 4. Values are natural log transformed BAU/ml.

Spearman correlation coefficient anti-NC with anti-S1 = 0.06 (p=NS); anti-NC with anti-RBD = 0.03 (p=NS); anti-S with anti-RBD 0.96 p<0.001.

Supplementary Figure 6 COVID-19 infection

Grey line = no COVID-19 symptoms reported; Dashed grey line = COVID-19 suspected but not tested; dashed black line = COVID-19 infection confirmed by community based testing (rapid detection or polymerase chain reaction test); solid black line = proportion anti-nucleocapsid seropositive V1 vaccine one; V2 vaccine two; V3 vaccine 3; V4 vaccine 4; mo = month(s).

Running title: COVID-19 vaccination in IMIDs

1  
2  
3  
4  
5  
6  
7  
8  
9  
10  
11  
12  
13  
14  
15  
16  
17  
18  
19  
20  
21  
22  
23  
24  
25  
26  
27  
28  
29  
30  
31  
32  
33  
34  
35  
36  
37  
38  
39  
40  
41  
42  
43  
44  
45  
46  
47  
48  
49  
50  
51  
52  
53  
54  
55  
56  
57  
58  
59  
60

For peer review only

1  
2  
3  
4  
5  
6  
7  
8  
9  
10  
11  
12  
13  
14  
15  
16  
17  
18  
19  
20  
21  
22  
23  
24  
25  
26  
27  
28  
29  
30  
31  
32  
33  
34  
35  
36  
37  
38  
39  
40  
41  
42  
43  
44  
45  
46  
47  
48  
49  
50  
51  
52  
53  
54  
55  
56  
57  
58  
59  
60

A

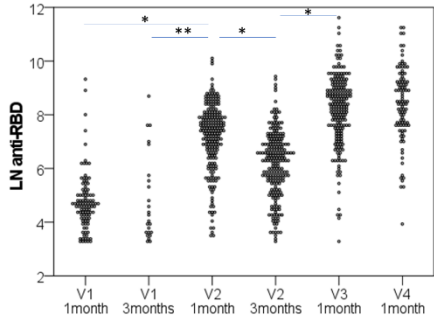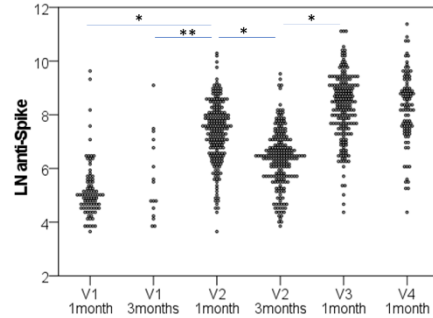

B

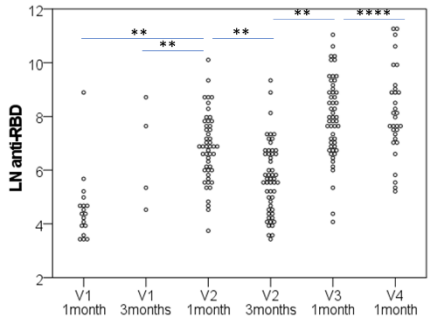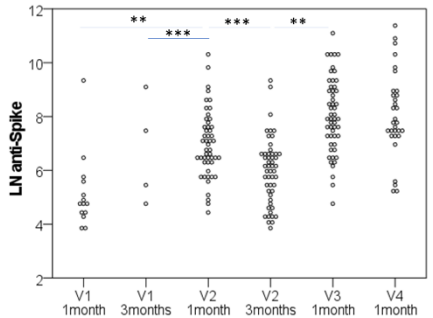

C

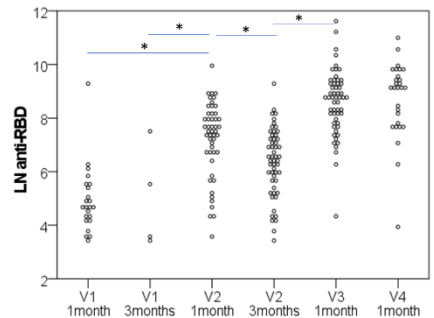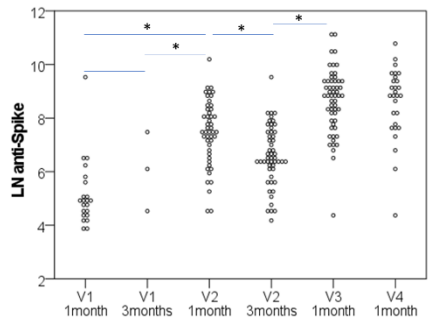

D

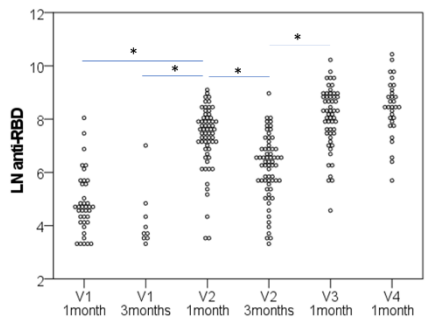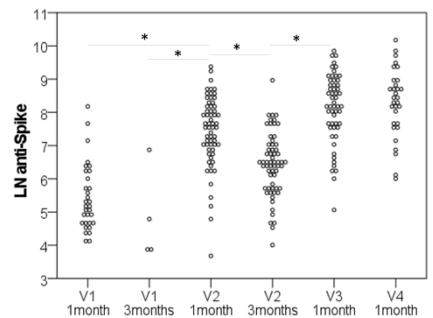

E

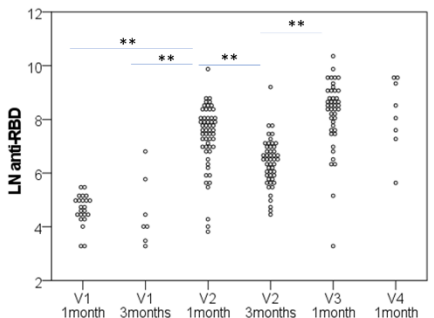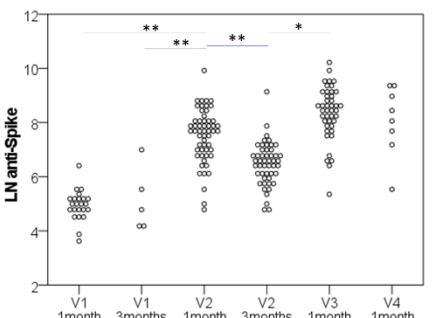

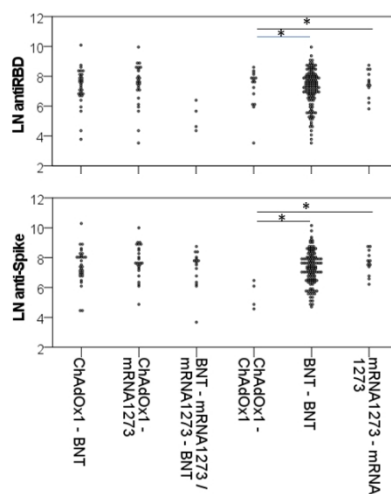

Figure 2 Titers of anti- spike and anti-receptor binding domain IgG levels 1 month following second vaccination by vaccine mixture. A log anti-RBD B log anti-Spike

Data for seroconverters only. IgG levels natural log transformed. S1= spike; RBD= receptor binding domain  
 BNT= BNT162b2, Unadjusted p values \* p<0.01

855x481mm (38 x 38 DPI)

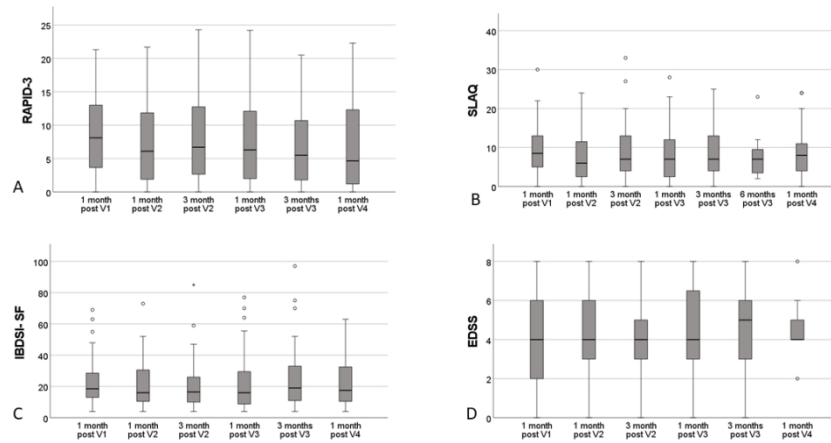

Figure 3 Disease activity before and after each vaccine

A Inflammatory arthritis B Systemic autoimmune rheumatic disease C Inflammatory bowel disease D Multiple Sclerosis

RAPID-3 Routine Assessment of Patient Index Data 3; SLAQ Systemic lupus activity questionnaire IBDSI-SF Inflammatory bowel disease symptom inventory – short form; EDSS Expanded disability status scale. V1 vaccine one; V2 vaccine two; V3 vaccine 3; V4 vaccine 4; mo = month(s).

855x481mm (38 x 38 DPI)

Hitchon et al  
Supplementary Tables and Figures

Supplementary Table 1 Categorization of IMID treatments

| Treatment                                              | Inflammatory Bowel Disease                                                         | Multiple Sclerosis                                                                                                          | Rheumatoid Arthritis and SARDs                                                                                                                                                                                                       |
|--------------------------------------------------------|------------------------------------------------------------------------------------|-----------------------------------------------------------------------------------------------------------------------------|--------------------------------------------------------------------------------------------------------------------------------------------------------------------------------------------------------------------------------------|
| <b>Corticosteroids<sup>1</sup></b>                     | Methylprednisolone<br>Prednisolone)<br>Prednisone<br>Budesonide<br>Hydrocortisone  | Methylprednisolone<br>Prednisolone<br>Prednisone                                                                            | Methylprednisolone)<br>Prednisolone<br>Prednisone<br>Triamcinolone<br>Cortisone                                                                                                                                                      |
| <b>Anti-inflammatory or Immunomodulatory therapies</b> | 5-ASA<br>Sulfasalazine                                                             | Glatiramer acetate<br>interferon-beta 1a<br>interferon-beta 1b<br>dimethyl fumarate<br>Teriflunomide<br>Peg interferon-beta | Sulfasalazine<br>sodium aurothiomalate<br>auranofin<br>aurothioglucose<br>Penicillamine<br>Hydroxychloroquine (                                                                                                                      |
| <b>Traditional immunosuppressive therapies</b>         | Azathioprine<br>Methotrexate<br>6-mercaptopurine<br>Cyclosporine<br>Tacrolimus     | Azathioprine<br>Methotrexate)<br>Mitoxantrone<br>Cyclophosphamide                                                           | Azathioprine<br>methotrexate<br>Cyclophosphamide<br>Cyclosporine<br>Leflunomide<br>Mycophenolate<br>Tacrolimus                                                                                                                       |
| <b>Novel therapies/<br/>Biologics</b>                  | Infliximab<br>adalimumab<br>Golimumab<br>Ustekinumab<br>Vedolizumab<br>Tofacitinib | Natalizumab<br>Fingolimod <sup>2</sup><br>Alemtuzumab<br>Cladribine<br>Ocrelizumab                                          | Infliximab)<br>adalimumab<br>Etanercept<br>Anakinra<br>Rituximab <sup>3</sup><br>Abatacept <sup>3</sup><br>Tocilizumab<br>Tofacitinib<br>Golimumab<br>Certolizumab<br>Upadacitinib<br>Baricitinib<br><b>Belimumab</b><br>Sekukinumab |

Hitchon et al  
Supplementary Tables and Figures

Supplementary Table 2 Seroconversion rates based on vaccine mixture between first and second vaccinations

RBD= receptor binding domain; BNT= BNT162b2

Homologous (any) versus heterologous (any) vaccine combination and seroconversion 1 month post V2 anti-Spike  $\chi^2$  7.8  $p < 0.01$ ; antiRBD  $\chi^2$  6.8  $p < 0.01$ ; 1 month post V3 anti-Spike  $\chi^2$  0.5  $p = NS$ ; anti RBD  $\chi^2$  0.2  $p = NS$

|                    | 1month post V2<br>Anti-Spike<br>seroconverted<br>n/N (%) | 1month post V2<br>Anti-RBD<br>seroconverted<br>n/N (%) | 1month post V3<br>Anti-Spike<br>seroconverted<br>n/N (%) | 1month post V3<br>Anti-RBD<br>seroconverted<br>n/N (%) |
|--------------------|----------------------------------------------------------|--------------------------------------------------------|----------------------------------------------------------|--------------------------------------------------------|
| Homologous         | 137/158 (86.7)                                           | 139/158 (88.0)                                         | 130/140 (92.9)                                           | 132/140 (94.3)                                         |
| ChAdOX1-ChAdOX1    | 4/6 (66.7)                                               | 4/6 (66.7)                                             | 5/6 (83.3)                                               | 5/6 (83.3)                                             |
| BNT-BNT            | 120/139 (84.3)                                           | 122/139 (87.8)                                         | 112/121 (92.6)                                           | 113/121 (93.4)                                         |
| mRNA 1273-mRNA1273 | 13/13 (100)                                              | 13/13 (100)                                            | 13/13 (100.0)                                            | 13/13 (100.0)                                          |
| Heterologous       | 69/70 (98.6)                                             | 69/70 (98.6)                                           | 64/65 (98.5)                                             | 64/65 (98.5)                                           |
| ChAdOX1-BNT        | 30/31 (96.8)                                             | 30/31 (96.8)                                           | 27/28 (96.4)                                             | 27/28 (96.4)                                           |
| ChAdOX1-mRNA1273   | 25/25 (100)                                              | 25/25 (100)                                            | 24/24 (100.0)                                            | 24/24 (100.0)                                          |
| BNT-mRNA1273       | 14/14 (100)                                              | 14/14 (100)                                            | 13/13 (100.0)                                            | 13/13 (100.0)                                          |

Hitchon et al

## Supplementary Tables and Figures

## Supplementary Table 3 Clinical features of IMIDs not seroconverting after 2 vaccinations

IA= inflammatory arthritis; SARDs= Systemic autoimmune rheumatic disease; MS= multiple sclerosis;  
 IBD= inflammatory bowel disease M=male; F=female

| IMID  | Sex | Age baseline | Medication                         | vaccine combination |
|-------|-----|--------------|------------------------------------|---------------------|
| IA    | M   | 82           | Prednisone                         | BNT-BNT             |
| IA    | F   | 77           | Methotrexate + rituximab           | BNT-BNT             |
| IA    | F   | 76           | tocilizumab                        | BNT-BNT             |
| IA    | F   | 70           | methotrexate + anti-TNF            | BNT-BNT             |
| IA    | F   | 61           | mycophenolate                      | BNT-BNT             |
| SARDs | F   | 66           | rituximab + prednisone             | BNT-BNT             |
| SARDs | F   | 60           | mycophenolate                      | Ch AdOX1-BNT        |
| SARDs | F   | 60           | mycophenolate                      | ChAdOX1-ChAdOX1     |
| SARDs | F   | 31           | rituximab + prednisone             | BNT-BNT             |
| SARDs | F   | 72           | mycophenolate                      | BNT-BNT             |
| SARDs | F   | 71           | mycophenolate                      | BNT-BNT             |
| SARDs | F   | 69           | mycophenolate + IV Immune globulin | BNT-BNT             |
| SARDs | F   | 28           | mycophenolate + past rituximab     | BNT-BNT             |
| SARDs | F   | 69           | azathioprine + past rituximab      | BNT-BNT             |
| SARDs | F   | 87           | mycophenolate                      | BNT-BNT             |
| MS    | F   | 56           | ocrelizumab                        | ChAdOX1-BNT         |
| MS    | M   | 57           | ocrelizumab                        | BNT-BNT             |
| MS    | F   | 42           | ocrelizumab                        | BNT-BNT             |
| MS    | F   | 74           | none                               | BNT-BNT             |
| MS    | F   | 36           | ocrelizumab                        | BNT-BNT             |
| MS    | F   | 66           | none                               | BNT-BNT             |
| MS    | M   | 46           | ocrelizumab                        | BNT-BNT             |
| MS    | F   | 48           | fingolimod                         | BNT-BNT             |
| MS    | F   | 81           | none                               | BNT-BNT             |
| MS    | F   | 34           | ocrelizumab                        | BNT-BNT             |
| IBD   | F   | 47           | anti-TNF                           | BNT-BNT             |
| IBD   | F   | 31           | anti-TNF + prednisone              | ChAdOX1-ChAdOX1     |
| IBD   | F   | 45           | anti-TNF                           | BNT-BNT             |
| IBD   | M   | 79           | azathioprine                       | BNT-BNT             |



Hitchon et al  
Supplementary Tables and Figures

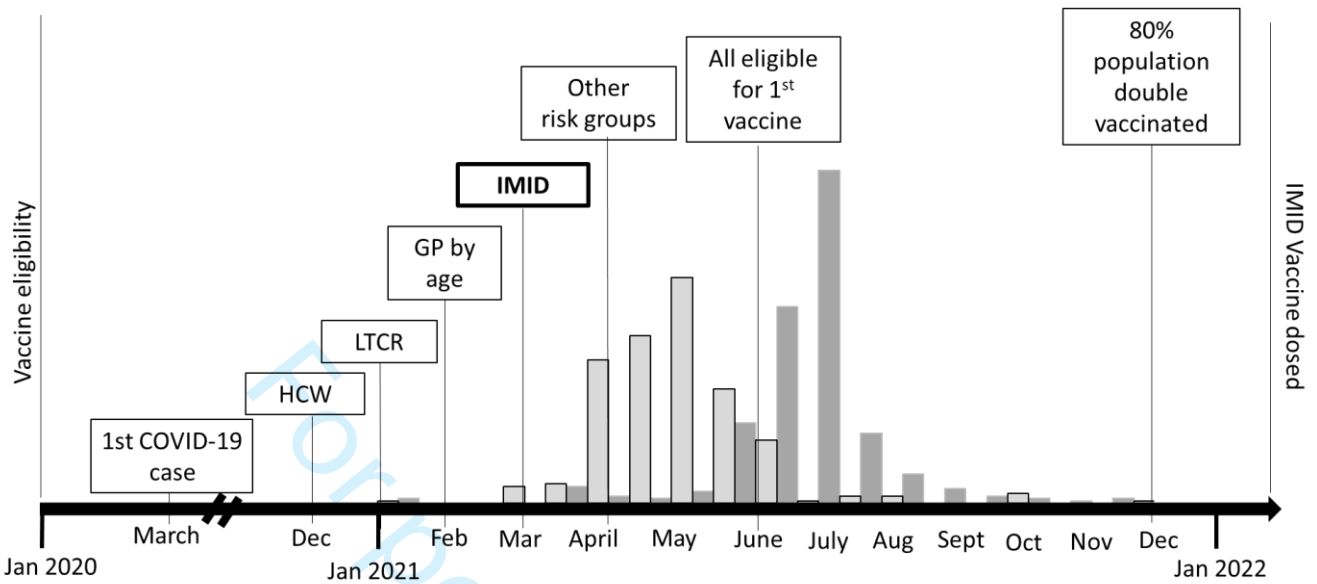

Supplementary Figure 1 Covid-19 vaccination timeline

HCW= health care workers; LTCR= long term care residents, GP= general population, IMID=immune mediated inflammatory disease; Bars indicate time when study participants (IMIDs) received vaccine. Light grey bars indicate time of first vaccine (V1); dark grey bars indicate time of second vaccine (V2).

Hitchon et al  
Supplementary Tables and Figures

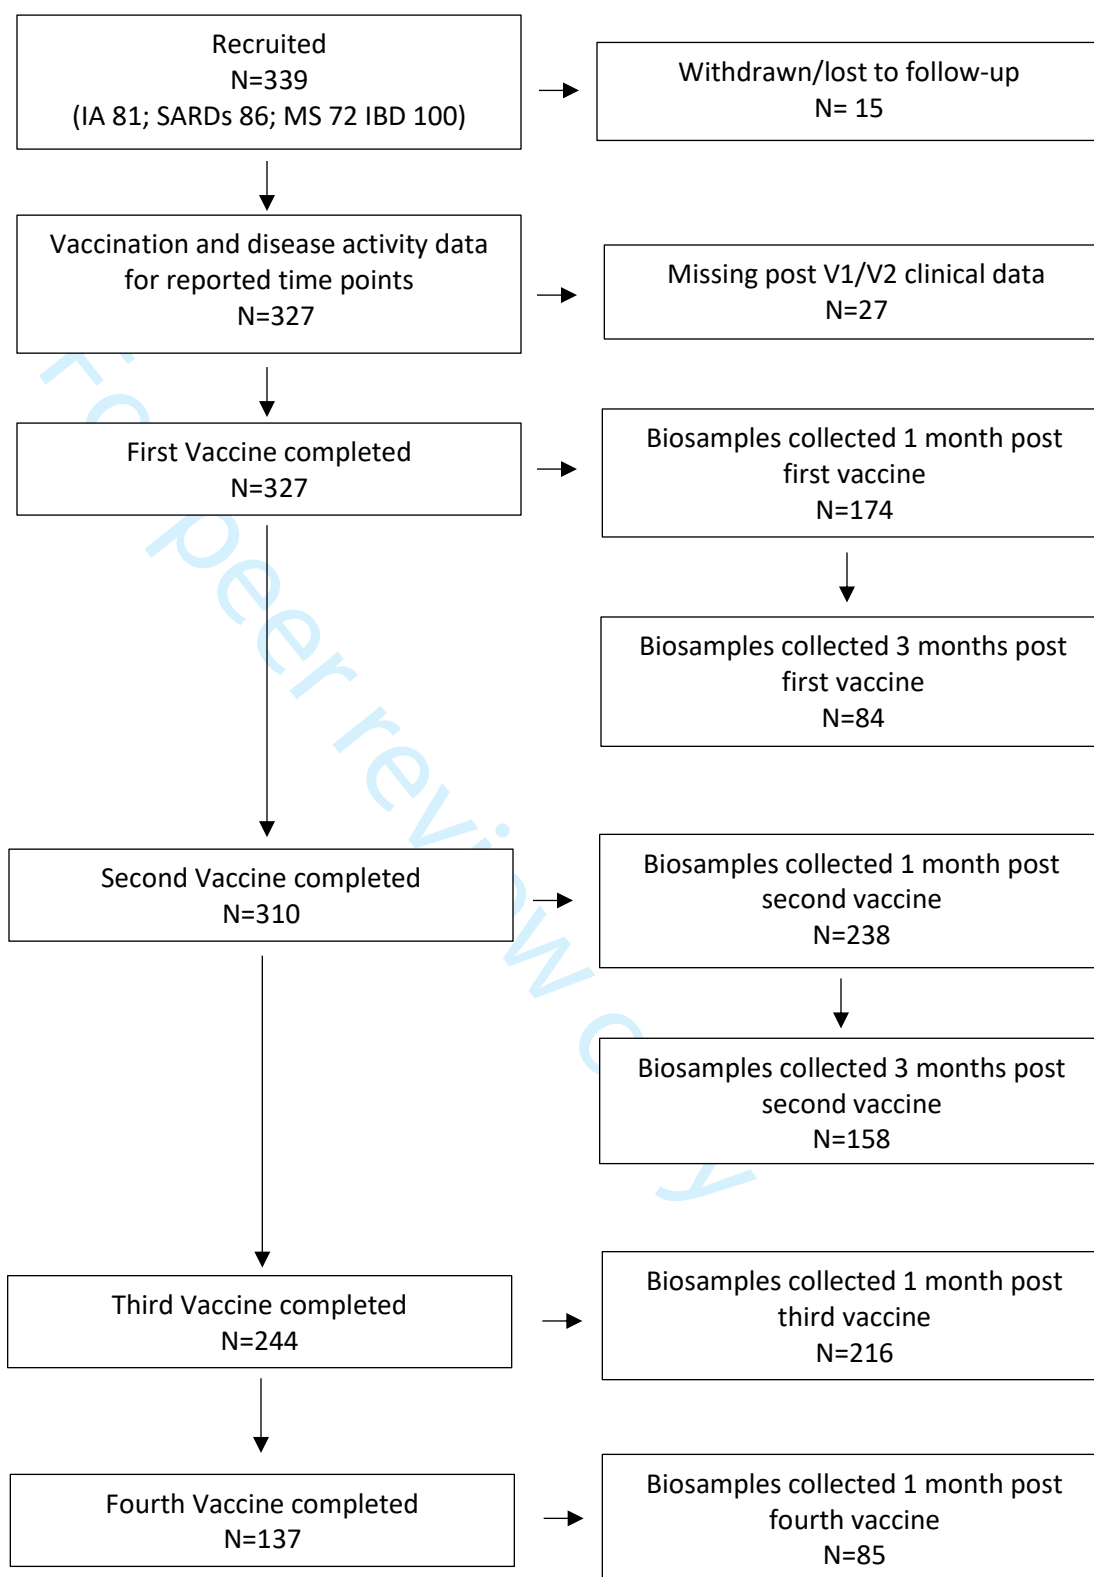

Supplementary Figure 2 Recruitment and sample acquisition chart

Hitchon et al  
Supplementary Tables and Figures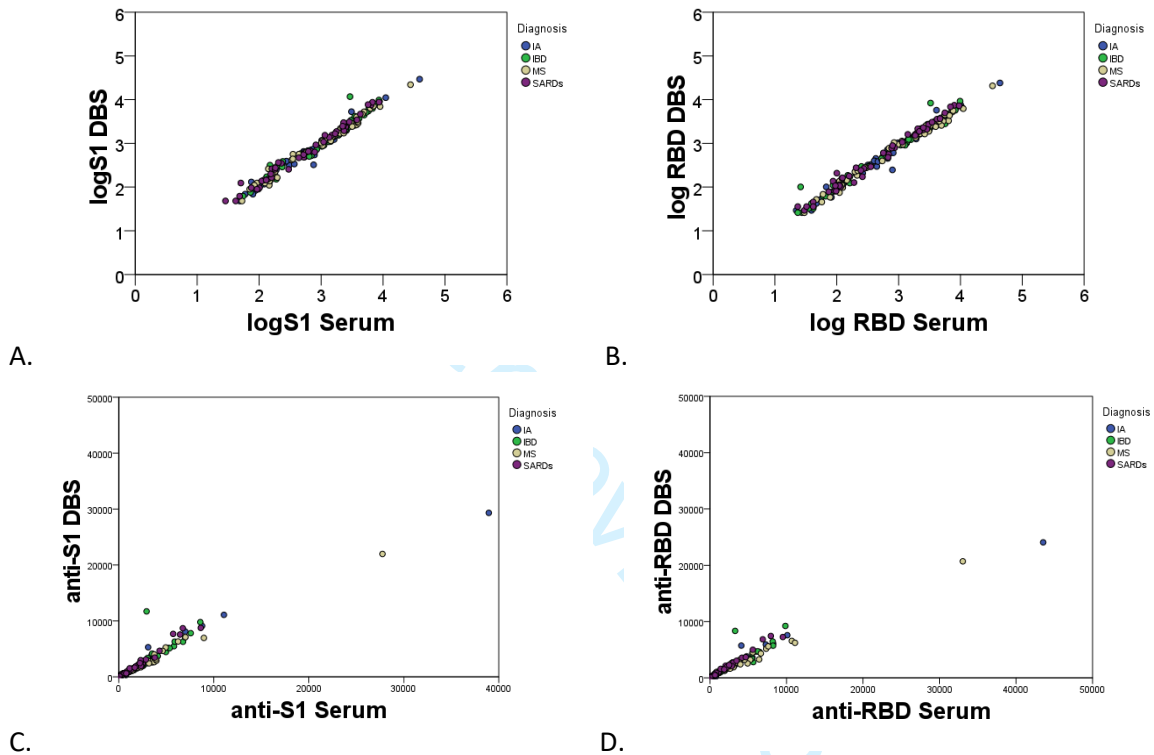

Supplementary Figure 3 Correlation between assays performed using serum and dried blood spot samples. A.  $\log$  Anti-S1 B  $\log$  anti-RBD, C. anti-S1 BAU/ml D anti RBD BAU/ml (Kendalls tau b correlation co-efficient anti-S1 BAU/ml= 0.92; anti-RBD BAU/ml=0.93)

Hitchon et al  
 Supplementary Tables and Figures

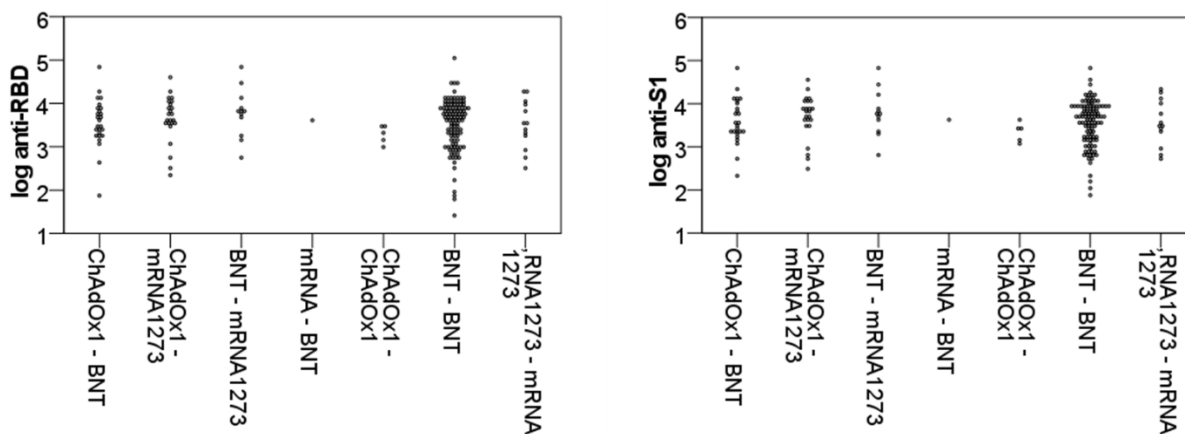

Supplementary Figure 4 Anti-SARS-CoV2 titers 1 month post third vaccine based on first and second vaccine mixture.

RBD= Receptor binding domain; S1= Spike 1. All comparisons p=NS

Hitchon et al  
Supplementary Tables and Figures

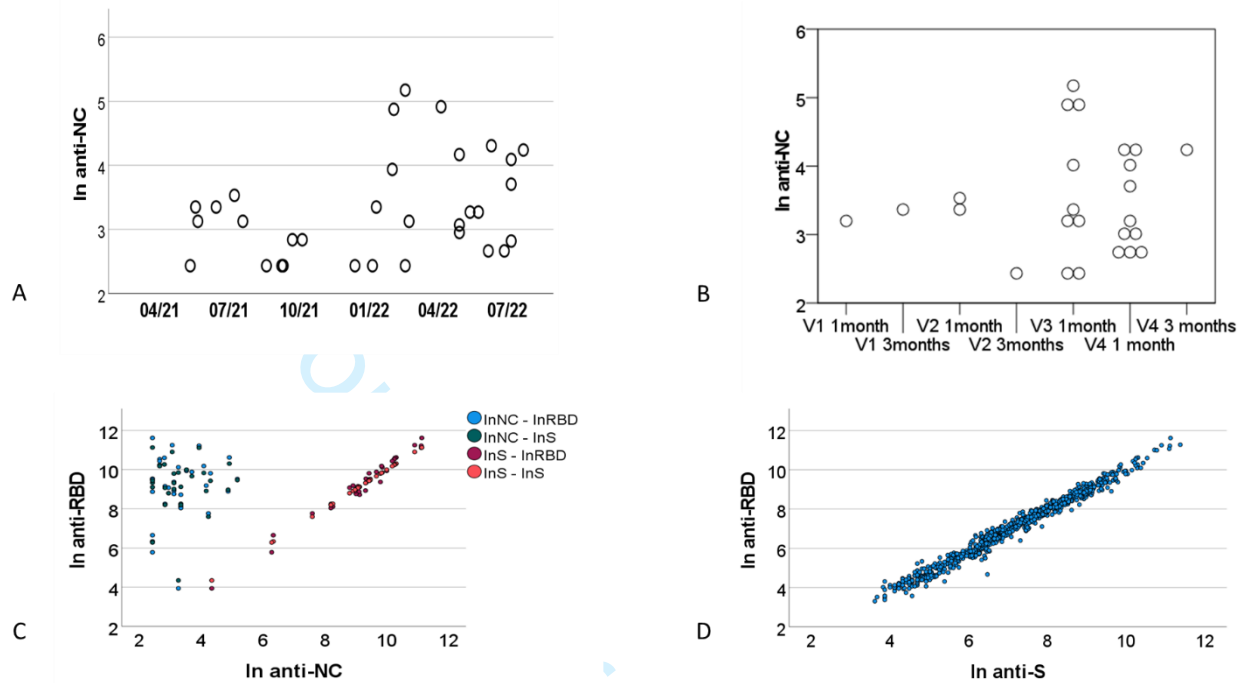

Supplementary Figure 5 Anti-Nucleocapsid antibody levels and correlations with Anti-Spike and Anti-Receptor Binding Domain antibodies

- A. Anti-NC titer by Calendar month/year B. Anti-NC titer by Study visit C. Correlation of anti-NC anti RBD and anti-S1 titers in samples seropositive for anti-NC D. Correlation of anti-RBD and anti-S1 titers in all seropositive samples.

NC = nucleocapsid S = Spike; RBD = receptor binding domain; ln = natural log. V1 = vaccine 1; V2 = vaccine 2; V3 = vaccine 3; V4 = vaccine 4. Values are natural log transformed BAU/ml.

Spearman correlation coefficient anti-NC with anti-S1 = 0.06 (p=NS); anti-NC with anti-RBD = 0.03 (p=NS); anti-S with anti-RBD 0.96 p<0.001. Figure 3 Disease activity before and after each vaccine

A Inflammatory arthritis B Systemic autoimmune rheumatic disease C Inflammatory bowel disease D Multiple Sclerosis

RAPID-3 Routine Assessment of Patient Index Data 3; SLAQ Systemic lupus activity questionnaire IBDSI-SF Inflammatory bowel disease symptom inventory – short form; EDSS Expanded disability status scale. V1 vaccine one; V2 vaccine two; V3 vaccine 3; V4 vaccine 4; mo = month(s).

Hitchon et al  
Supplementary Tables and Figures

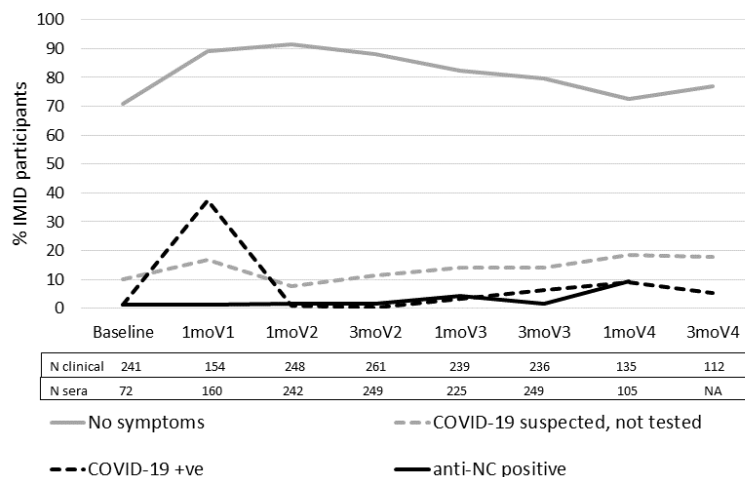

Supplementary Figure 6 COVID-19 infection

Grey line = no COVID-19 symptoms reported; Dashed grey line = COVID-19 suspected but not tested; dashed black line = COVID-19 infection confirmed by community based testing (rapid detection or polymerase chain reaction test); solid black line = proportion anti-nucleocapsid seropositive.

V1 vaccine one; V2 vaccine two; V3 vaccine 3; V4 vaccine 4.; mo = month(s)

## STROBE Statement—checklist of items that should be included in reports of observational studies

|                              | Item No | Recommendation                                                                                                                                                                                                                                                                                                                                                                                                                                                         | Page No |
|------------------------------|---------|------------------------------------------------------------------------------------------------------------------------------------------------------------------------------------------------------------------------------------------------------------------------------------------------------------------------------------------------------------------------------------------------------------------------------------------------------------------------|---------|
| <b>Title and abstract</b>    | 1       | (a) Indicate the study's design with a commonly used term in the title or the abstract                                                                                                                                                                                                                                                                                                                                                                                 | 1       |
|                              |         | (b) Provide in the abstract an informative and balanced summary of what was done and what was found                                                                                                                                                                                                                                                                                                                                                                    | 4       |
| <b>Introduction</b>          |         |                                                                                                                                                                                                                                                                                                                                                                                                                                                                        |         |
| Background/rationale         | 2       | Explain the scientific background and rationale for the investigation being reported                                                                                                                                                                                                                                                                                                                                                                                   | 7       |
| Objectives                   | 3       | State specific objectives, including any prespecified hypotheses                                                                                                                                                                                                                                                                                                                                                                                                       | 7-8     |
| <b>Methods</b>               |         |                                                                                                                                                                                                                                                                                                                                                                                                                                                                        |         |
| Study design                 | 4       | Present key elements of study design early in the paper                                                                                                                                                                                                                                                                                                                                                                                                                | 7-8     |
| Setting                      | 5       | Describe the setting, locations, and relevant dates, including periods of recruitment, exposure, follow-up, and data collection                                                                                                                                                                                                                                                                                                                                        | 7-8     |
| Participants                 | 6       | (a) <i>Cohort study</i> —Give the eligibility criteria, and the sources and methods of selection of participants. Describe methods of follow-up<br><i>Case-control study</i> —Give the eligibility criteria, and the sources and methods of case ascertainment and control selection. Give the rationale for the choice of cases and controls<br><i>Cross-sectional study</i> —Give the eligibility criteria, and the sources and methods of selection of participants | 7-8     |
|                              |         | (b) <i>Cohort study</i> —For matched studies, give matching criteria and number of exposed and unexposed<br><i>Case-control study</i> —For matched studies, give matching criteria and the number of controls per case                                                                                                                                                                                                                                                 |         |
| Variables                    | 7       | Clearly define all outcomes, exposures, predictors, potential confounders, and effect modifiers. Give diagnostic criteria, if applicable                                                                                                                                                                                                                                                                                                                               | 8-9     |
| Data sources/<br>measurement | 8*      | For each variable of interest, give sources of data and details of methods of assessment (measurement). Describe comparability of assessment methods if there is more than one group                                                                                                                                                                                                                                                                                   | 7-9     |
| Bias                         | 9       | Describe any efforts to address potential sources of bias                                                                                                                                                                                                                                                                                                                                                                                                              | 7-9     |
| Study size                   | 10      | Explain how the study size was arrived at                                                                                                                                                                                                                                                                                                                                                                                                                              |         |
| Quantitative variables       | 11      | Explain how quantitative variables were handled in the analyses. If applicable, describe which groupings were chosen and why                                                                                                                                                                                                                                                                                                                                           | 7-9     |
| Statistical methods          | 12      | (a) Describe all statistical methods, including those used to control for confounding                                                                                                                                                                                                                                                                                                                                                                                  | 9       |
|                              |         | (b) Describe any methods used to examine subgroups and interactions                                                                                                                                                                                                                                                                                                                                                                                                    | 9       |
|                              |         | (c) Explain how missing data were addressed                                                                                                                                                                                                                                                                                                                                                                                                                            | 8       |
|                              |         | (d) <i>Cohort study</i> —If applicable, explain how loss to follow-up was addressed<br><i>Case-control study</i> —If applicable, explain how matching of cases and controls was addressed<br><i>Cross-sectional study</i> —If applicable, describe analytical methods taking account of sampling strategy                                                                                                                                                              | NA      |
|                              |         | (e) Describe any sensitivity analyses                                                                                                                                                                                                                                                                                                                                                                                                                                  |         |

Continued on next page

| <b>Results</b>           |     |                                                                                                                                                                                                              |                            |
|--------------------------|-----|--------------------------------------------------------------------------------------------------------------------------------------------------------------------------------------------------------------|----------------------------|
| Participants             | 13* | (a) Report numbers of individuals at each stage of study—eg numbers potentially eligible, examined for eligibility, confirmed eligible, included in the study, completing follow-up, and analysed            | 10 and S Fig 2             |
|                          |     | (b) Give reasons for non-participation at each stage                                                                                                                                                         | S Fig 2                    |
|                          |     | (c) Consider use of a flow diagram                                                                                                                                                                           | S Fig2                     |
| Descriptive data         | 14* | (a) Give characteristics of study participants (eg demographic, clinical, social) and information on exposures and potential confounders                                                                     | 10 Table1                  |
|                          |     | (b) Indicate number of participants with missing data for each variable of interest                                                                                                                          | Table 1                    |
|                          |     | (c) <i>Cohort study</i> —Summarise follow-up time (eg, average and total amount)                                                                                                                             |                            |
| Outcome data             | 15* | <i>Cohort study</i> —Report numbers of outcome events or summary measures over time                                                                                                                          | <i>Table 1</i>             |
|                          |     | <i>Case-control study</i> —Report numbers in each exposure category, or summary measures of exposure                                                                                                         |                            |
|                          |     | <i>Cross-sectional study</i> —Report numbers of outcome events or summary measures                                                                                                                           |                            |
| Main results             | 16  | (a) Give unadjusted estimates and, if applicable, confounder-adjusted estimates and their precision (eg, 95% confidence interval). Make clear which confounders were adjusted for and why they were included | 10-12 Figure 1,2,4 Table 3 |
|                          |     | (b) Report category boundaries when continuous variables were categorized                                                                                                                                    |                            |
|                          |     | (c) If relevant, consider translating estimates of relative risk into absolute risk for a meaningful time period                                                                                             |                            |
| Other analyses           | 17  | Report other analyses done—eg analyses of subgroups and interactions, and sensitivity analyses                                                                                                               | 10-12                      |
| <b>Discussion</b>        |     |                                                                                                                                                                                                              |                            |
| Key results              | 18  | Summarise key results with reference to study objectives                                                                                                                                                     | 12                         |
| Limitations              | 19  | Discuss limitations of the study, taking into account sources of potential bias or imprecision. Discuss both direction and magnitude of any potential bias                                                   | 13-14                      |
| Interpretation           | 20  | Give a cautious overall interpretation of results considering objectives, limitations, multiplicity of analyses, results from similar studies, and other relevant evidence                                   | 13-14                      |
| Generalisability         | 21  | Discuss the generalisability (external validity) of the study results                                                                                                                                        | 14                         |
| <b>Other information</b> |     |                                                                                                                                                                                                              |                            |
| Funding                  | 22  | Give the source of funding and the role of the funders for the present study and, if applicable, for the original study on which the present article is based                                                | 15                         |

\*Give information separately for cases and controls in case-control studies and, if applicable, for exposed and unexposed groups in cohort and cross-sectional studies.

**Note:** An Explanation and Elaboration article discusses each checklist item and gives methodological background and published examples of transparent reporting. The STROBE checklist is best used in conjunction with this article (freely available on the Web sites of PLoS Medicine at <http://www.plosmedicine.org/>, Annals of Internal Medicine at <http://www.annals.org/>, and Epidemiology at <http://www.epidem.com/>). Information on the STROBE Initiative is available at [www.strobe-statement.org](http://www.strobe-statement.org).



# BMJ Open

## Immunogenicity and safety of mixed COVID-19 vaccine regimens in patients with immune mediated inflammatory diseases: a single-centre prospective cohort study

|                                 |                                                                                                                                                                                                                                                                                                                                                                                                                           |
|---------------------------------|---------------------------------------------------------------------------------------------------------------------------------------------------------------------------------------------------------------------------------------------------------------------------------------------------------------------------------------------------------------------------------------------------------------------------|
| Journal:                        | <i>BMJ Open</i>                                                                                                                                                                                                                                                                                                                                                                                                           |
| Manuscript ID                   | bmjopen-2022-071397.R1                                                                                                                                                                                                                                                                                                                                                                                                    |
| Article Type:                   | Original research                                                                                                                                                                                                                                                                                                                                                                                                         |
| Date Submitted by the Author:   | 15-Apr-2023                                                                                                                                                                                                                                                                                                                                                                                                               |
| Complete List of Authors:       | Hitchon, Carol; University of Manitoba College of Medicine, Mesa, Christine; National Microbiology Laboratory<br>Bernstein, Charles; University of Manitoba College of Medicine<br>Marrie, Ruth Ann; University of Manitoba College of Medicine<br>Card, Catherine; National Microbiology Laboratory; University of Manitoba<br>O'Brien, Sheila F; Canadian Blood Services<br>Kim, John; National Microbiology Laboratory |
| <b>Primary Subject Heading</b>: | Infectious diseases                                                                                                                                                                                                                                                                                                                                                                                                       |
| Secondary Subject Heading:      | Gastroenterology and hepatology, Neurology, Rheumatology, Immunology (including allergy)                                                                                                                                                                                                                                                                                                                                  |
| Keywords:                       | COVID-19, RHEUMATOLOGY, GASTROENTEROLOGY, NEUROLOGY, IMMUNOLOGY                                                                                                                                                                                                                                                                                                                                                           |
|                                 |                                                                                                                                                                                                                                                                                                                                                                                                                           |

SCHOLARONE™  
Manuscripts



I, the Submitting Author has the right to grant and does grant on behalf of all authors of the Work (as defined in the below author licence), an exclusive licence and/or a non-exclusive licence for contributions from authors who are: i) UK Crown employees; ii) where BMJ has agreed a CC-BY licence shall apply, and/or iii) in accordance with the terms applicable for US Federal Government officers or employees acting as part of their official duties; on a worldwide, perpetual, irrevocable, royalty-free basis to BMJ Publishing Group Ltd ("BMJ") its licensees and where the relevant Journal is co-owned by BMJ to the co-owners of the Journal, to publish the Work in this journal and any other BMJ products and to exploit all rights, as set out in our [licence](#).

The Submitting Author accepts and understands that any supply made under these terms is made by BMJ to the Submitting Author unless you are acting as an employee on behalf of your employer or a postgraduate student of an affiliated institution which is paying any applicable article publishing charge ("APC") for Open Access articles. Where the Submitting Author wishes to make the Work available on an Open Access basis (and intends to pay the relevant APC), the terms of reuse of such Open Access shall be governed by a Creative Commons licence – details of these licences and which [Creative Commons](#) licence will apply to this Work are set out in our licence referred to above.

Other than as permitted in any relevant BMJ Author's Self Archiving Policies, I confirm this Work has not been accepted for publication elsewhere, is not being considered for publication elsewhere and does not duplicate material already published. I confirm all authors consent to publication of this Work and authorise the granting of this licence.

Running title: COVID-19 vaccination in IMIDs

Immunogenicity and safety of mixed COVID-19 vaccine regimens in patients with immune mediated inflammatory diseases: a single-centre prospective cohort study

Running Title: COVID-19 vaccination in IMIDs

CA Hitchon <sup>1</sup>, C Mesa <sup>2</sup>, CN Bernstein <sup>1</sup>, RA Marrie <sup>1,3</sup>, C Card <sup>2,4</sup>, S O'Brien <sup>5</sup>, J Kim <sup>2</sup>

1 Department of Internal Medicine, Max Rady College of Medicine, Rady Faculty of Health Sciences, University of Manitoba, Winnipeg, CAN

2 National Microbiology Laboratory Public Health Agency of Canada Winnipeg, CAN

3 Department of Community Health Sciences, Max Rady College of Medicine, Rady Faculty of Health Sciences, University of Manitoba, Winnipeg, CAN

4 Department of Medical Microbiology and Infectious Diseases, Rady Faculty of Health Sciences, University of Manitoba, Winnipeg, CAN

5 Canadian Blood Services, Ottawa, CAN

Authors:

Carol A Hitchon MD MSc Department of Internal Medicine, Max Rady College of Medicine, Rady Faculty of Health Sciences, University of Manitoba, Winnipeg, CAN

Christine Mesa, MSc National Microbiology Laboratory Public Health Agency of Canada Winnipeg, CAN

Charles N Bernstein, MD Department of Internal Medicine, Max Rady College of Medicine, Rady Faculty of Health Sciences, University of Manitoba, Winnipeg, CAN

Ruth Ann Marrie, MD PhD Department of Internal Medicine, and Department of Community Health Sciences, Max Rady College of Medicine, Rady Faculty of Health Sciences, University of Manitoba, Winnipeg, CAN

Sheila O'Brien, PhD Canadian Blood Services, Ottawa, CAN

Catherine Card, PhD, National Microbiology Laboratory, Public Health Agency of Canada Winnipeg, CAN and Department of Medical Microbiology and Infectious Diseases, Rady Faculty of Health Sciences, University of Manitoba, Winnipeg, CAN

John Kim PhD National Microbiology Laboratory Public Health Agency of Canada Winnipeg, CAN

1 Running title: COVID-19 vaccination in IMIDs

2  
3 Corresponding author

4  
5 CA Hitchon

6  
7 RR149 800 Sherbrook Street

8  
9 Winnipeg, Manitoba

10  
11 email: carol.hitchon@umanitoba.ca

12  
13  
14  
15 Study funding from Research Manitoba. Dr Kim's lab receives funding from the Public Health  
16 Agency of Canada

17  
18 Role of funding sources: The study sponsors had no role in study design, data collection,  
19 analysis, interpretation, writing, or in the decision to submit the manuscript.

20  
21  
22  
23 Disclosures

24  
25 CH: unrelated grant funding from Pfizer; Advisory board for Astra-Zeneca Canada for  
26 unrelated product, unrelated research funds from Research Manitoba, Health Sciences  
27 Center foundation, International League of Associations for Rheumatology, unrelated  
28 educational funds from the Royal College of Physicians and Surgeons of Canada.

29  
30  
31 RAM: Ruth Ann Marrie receives research funding from: CIHR, Research Manitoba, Multiple  
32 Sclerosis Society of Canada, Multiple Sclerosis Scientific Foundation, Crohn's and Colitis  
33 Canada, National Multiple Sclerosis Society, the CMSC, the Arthritis Society, Brain Canada,  
34 and US Department of Defense. She is a co-investigator on a study funded in part by Biogen  
35 Idec and Roche Canada. She is supported by the Waugh Family Chair in Multiple Sclerosis.

36  
37  
38  
39 CNB: Dr Bernstein is supported by the Bingham Chair in Gastroenterology. Dr. Bernstein has  
40 served on advisory Boards for AbbVie Canada, Amgen Canada, Bristol Myers Squibb Canada,  
41 Roche Canada, Janssen Canada, Sandoz Canada, Takeda Canada, and Pfizer Canada;  
42 Consultant for Mylan Pharmaceuticals and Takeda; Educational grants from Abbvie Canada,  
43 Pfizer Canada, Takeda Canada, and Janssen Canada. Speaker's panel for Abbvie Canada,  
44 Janssen Canada, Pfizer Canada, and Takeda Canada. Received research funding from Abbvie  
45 Canada, Bristol Myers Squibb Canada, Sandoz Canada and Pfizer Canada.

46  
47  
48 CM: none

49  
50  
51 CC: Receives grant funding from PHAC and CITF through internal research funding streams at  
52 PHAC

53  
54 SOB: none

55  
56 JK: none

Running title: COVID-19 vaccination in IMIDs

Abstract 300/300 words

Manuscript 3300/4000 words

References 39

Tables 3; Figures 3

Supplemental Tables 4, Supplemental Figures 7

Key words: COVID-19, rheumatology, gastroenterology, neurology, immunology

For peer review only

Running title: COVID-19 vaccination in IMIDs

### Abstract 300/300

Objective: Among persons with immune-mediated inflammatory diseases (IMIDs) who received SARS-CoV-2 vaccines, we compared post-vaccine antibody responses and IMID disease activity/states.

Design: Single centre prospective cohort study

Setting: Specialty ambulatory clinics in central Canada.

Participants: People with inflammatory arthritis (n=78; 77% rheumatoid arthritis), systemic autoimmune rheumatic diseases (n=84; 57% lupus), inflammatory bowel disease (n=93; 43% Crohn's), and multiple sclerosis (n=72; 71% relapsing-remitting) (female 79.4%, white 84.7%, mean (standard deviation) age 56.0(14.3 years) received COVID-19 vaccinations between 03/2021-09/2022.

Primary outcome: Post-vaccination anti-spike, -receptor binding domain (RBD) and -nucleocapsid (NC) IgG antibodies tested by multiplex immunoassays compared across vaccine regimens and to responses in 370 age-sex matched vaccinated controls.

Secondary Outcomes: COVID-19 infection and self-reported IMID disease activity/state.

Results: Most 216/327(66.1%) received homologous mRNA (BNT162b2 or mRNA1273) vaccines, 2.4% received homologous ChAdOx1, and 30.6% received heterologous vaccines (23.9% ChAdOx1/mRNA, 6.4% heterologous mRNA) for their first two vaccines (V1,V2). Seroconversion rates were: post-V1 anti-spike 91/175(52.0%), anti-RBD 103/175(58.9%); post-V2 anti-spike 214/234(91.5%), anti-RBD 211/234(90.2%), and were lower than controls (post-V2 anti-Spike 360/370(98.1%) p<0.0001. Antibody titers decreased 3 months post-V2 but increased 1 month post-V3 and 1 month post-V4 [BAU/ml median (interquartile range-IQR) 1 month post-V2, 3 months post-V2, 1 month post-V3, 1 month post V4 anti-S1 1835(2448), 629.1(883.4), 4757.5(7033.1), 4356.0(9393.4); anti-RBD 1686.8(2199.44), 555.8(809.3), 4280.3(6380.6), 4792.2(11673.78)]. If primed with a vector vaccine, a mRNA vaccine increased antibody titers to those comparable to homologous mRNA vaccines. Anti-RBD and anti-Spike titers were higher in anti-NC seropositive (N=31; 25 participants) versus seronegative samples [BAU/ml median (IQR) anti-RBD 11755.3(20373.1) vs 1248.0(53278.7); anti-Spike 11254.4(15352.6) vs 1313.1(3106.6); both p<0.001). IMID disease activity/state and rates of self-reported moderate or severe IMID flare were similar across vaccinations.

Conclusion: Heterologous COVID-19 vaccination improves seroconversion rates following a vector vaccine and does not lead to IMID disease flare. IMIDs benefit from at least three vaccines.

Funding: Research Manitoba, Public Health Agency of Canada

**Key Words: COVID-19, vaccination, immune systems diseases**

Running title: COVID-19 vaccination in IMIDs

### Strengths and limitations

- Longitudinal cohort study with systematic collection of data on COVID-19 infection, IMID disease activity and with paired biosamples for anti-SARSCoV2 IgG assays following each vaccine for up to four vaccines.
- Cross disease comparisons of four IMIDs from different medical specialties which are treated with immunocompromising medications.
- Validated measures of self-report IMID disease activity/state used to assess vaccine safety and risk of post-vaccine IMID disease flare.
- Relatively small sample size for each IMID and predominantly female population (as expected for these IMIDs) limits analysis of sex and gender effects.

Running title: COVID-19 vaccination in IMIDs

## Introduction

COVID-19 vaccines have reduced rates of serious severe acute respiratory syndrome coronavirus (SARS-CoV-2) infection and mortality in the general population.<sup>1-4</sup> However, information on optimal vaccine strategies for immunocompromised individuals who are at increased risk of serious COVID-19 infection is limited.

Immune-mediated inflammatory diseases (IMIDs) such as autoimmune inflammatory arthritis (IA), systemic autoimmune rheumatic disease (SARD), inflammatory bowel disease (IBD), and multiple sclerosis (MS) affect 5% of the general population and share an autoimmune phenotype that affects multiple organ systems and treatment with immune therapies<sup>5</sup>. Due to immune-mediated disease and treatment, some people with IMIDs are at increased risk of vaccine preventable disease including serious COVID-19 infection<sup>6-10</sup>. While COVID-19 vaccines are effective in the general population, immune dysregulation from disease or treatment may impair vaccine responses in people with IMIDs. Due to evolving regional vaccination strategies in our region (<sup>11</sup> and Supplemental Figure 1), a high proportion of individuals with immunocompromised conditions received heterologous vaccine courses. Although available data on immunogenicity of these mixed vaccine courses in the general population are reassuring,<sup>12-14</sup> data are limited regarding the safety and immunogenicity of this strategy for immunocompromised patients as are data comparing these outcomes across diseases.

We established a cohort of patients diagnosed with any of IA, SARDs, IBD or MS to determine the safety (IMID flare) and humoral immunogenicity following COVID-19 vaccination and to assess the impact of mixing COVID-19 vaccine types. Herein, we report the clinical safety results and seroconversion results obtained after four vaccinations and compare seroconversion rates across initial vaccine combinations.

## Methods:

Study Design: This single centre prospective cohort from Manitoba, Canada, was established in March 2021 and enrolled people diagnosed with any of IA, SARDs, IBD, or MS. Data was



Running title: COVID-19 vaccination in IMIDs

collected until October 30<sup>th</sup> 2022. Vaccines were administered in accordance with provincial public health recommendations. Study participants were followed 1 and 3 months after each vaccine for up to four vaccines.

**Study Objectives:** The primary study objective was to compare post-vaccination anti-spike, -receptor binding domain (RBD) and -nucleocapsid (NC) IgG antibody seroconversion and titres across vaccine regimens. Secondary study objectives were to determine the kinetics of seropositivity and titers across vaccine doses, to compare immunogenicity across IMIDs, to determine the effect of vaccination on COVID-19 infection (efficacy), and to determine post vaccine IMID disease activity/state and self-reported IMID flare (safety).

**Study Recruitment:** We approached potential participants attending ambulatory clinics using multiple methods with an aim to enrol 400 individuals with a diagnosed IMID. Our sample size was limited by recruitment.

**Clinical data collected:** Demographic data, including birth date, sex, self-reported ethnic group according to Canadian Institute for Health Information guidelines<sup>15</sup>, highest education level achieved, self-reported comorbidity and health behaviors such as smoking history were collected at baseline. Clinical data including IMID treatment, IMID-specific disease activity/state measures, participant reported interval COVID-19 infections with type of confirmatory test, and biosamples were collected at each visit. IMID treatment was subcategorized as anti-inflammatories and immunomodulators such as 5-ASA, sulfasalazine, hydroxychloroquine, glatiramer, and interferon therapies; traditional immunosuppressants such as methotrexate, leflunomide, azathioprine, and mycophenolate; biologic or advanced therapies such as anti-tumor necrosis factor agents, B cell depleting agents, vedolizumab, fingolimod, anti-cytokine therapies, other biologics and janus kinase inhibitors; and corticosteroids (Supplementary Table 1). Self-reported IMID disease activity/status was assessed with disease relevant validated measures (IA: Routine Assessment of Inflammatory Disease version 3 RAPID-3, Rheumatoid Arthritis Flare Core domain indices; SARDs: Systemic Lupus Activity Questionnaire SLAQ; IBD: Inflammatory Bowel Symptoms Severity Index-Short Form (IBDSI-SF), Manitoba IBD flare question; MS: self report disease activity, Expanded Disability Status Scale [EDSS])<sup>16-20</sup>. These

Running title: COVID-19 vaccination in IMIDs

disease-related questionnaires were fully completed for IBD (248/255 97% visits), IA (208/215; 97% visits), SARDs (239/260; 92% visits), and MS (291/327; 89% visits). Data were not imputed.

Individuals could attend a study visit in person or submit their data by mailed paper forms or direct entry into a REDCap electronic database hosted at the University of Manitoba<sup>21</sup>.

Participants had the option to participate in the safety study component only.

**Biosamples:** Participants not attending the clinic were provided kits to collect blood by finger poke on dried blood spot (DBS) cards for postal submission<sup>22</sup>. Participants attending the clinic had blood collected by venipuncture and DBS were prepared before processing blood for serum. Aliquoted serum and DBS cards were stored at -20C for batch testing.

Regional population control biosample data were obtained from 370 vaccinated Canadian Blood Services blood donors who were age and sex-matched to the clinical cohort. Data on vaccine type administered was not available.

**Serology:** A bead-based multiplexed immunoassay was used to detect IgG anti-Spike (S1), Receptor Binding Domain (RBD) (reflecting response to vaccine), and Nucleocapsid (NC) antibodies (reflecting response to infection) (Bio-Rad Bioplex 2200 SARS-CoV-2 IgG assay). This assay was chosen based on an evaluation of several multiplex platforms using a large panel of well-pedigreed plasma-DBS specimens<sup>22</sup>. The quantitative measurement of the antibody response used the WHO International standard for anti-SARS-CoV-2 antibody detection. Cut-offs for seropositivity for DBS samples were established using ROC curve analysis. Cut-offs for plasma from the company were used. Sera from IA (n=19) and lupus (n=31) patients collected before the pandemic were tested to evaluate the potential for false positive SARS-CoV-2 antibody tests in IMIDs with known autoantibodies. Concordance of antibody assays in paired DBS and serum samples was assessed using the Kendalls tau b test. The controls were tested using the Roche Elecsys<sup>®</sup> anti-SARS-CoV-2 spike protein semiquantitative immunoassay (Roche Diagnostics International Ltd, Rotkreuz, Switzerland) which measures total antibodies (including IgA, IgM and IgG) to the SARS-CoV2- spike protein (anti-S) and the Roche Elecsys<sup>®</sup> anti-SARS-CoV-2 qualitative immunoassay (Roche Diagnostics LTD Rotkreuz, Switzerland) which measures

Running title: COVID-19 vaccination in IMIDs

total antibodies (including IgA, IgM and IgG) to SARS-CoV-2 recombinant protein, nucleocapsid antigen (anti-NC).

Analysis: Demographic information of participants is reported using descriptive statistics including mean (standard deviation-sd), median (range or interquartile range-IQR), and counts (%). Non-parametric tests (Mann-Whitney U or Kruskal Wallis tests with Bonferroni adjustment [Badj] for multiple comparisons) were used to compare antibody levels across groups and visits. Wilcoxon signed rank tests were used to compare antibody levels across visits within individuals. Binary logistic regression was used to evaluate predictors of seroconversion one month following vaccine 2 (V2). Variables included sex, age greater than 65 years, IMID diagnosis, and treatment category (none versus biologics and advanced therapies versus immunosuppressants versus other agents), and vaccine mix (vector-mRNA versus mRNA-mRNA). Statistical analysis was conducted using IBM SPSS Statistics version 27 for Windows (IBM Corporation, Armonk, N.Y., USA).

All subjects provided informed consent. The study was approved by the University of Manitoba Health Research Ethics Board (HS24647-H2021-005), Manitoba Shared Health (SH2021:009), and the Health Canada and Public Health Agency of Canada Research Ethics Board (REB 2021-018P).

Patient/public involvement: None.

## Results:

Between March 12th 2021 and July 30 2022, we recruited 339 participants (Supplementary Figure 2). Vaccination and disease activity data for the time points reported herein were available for 327 participants (78 IA: 77% RA; 84 SARDS: 57% % lupus; 93 IBD: 43 % Crohn's and 72 MS: 71% Relapsing remitting) (Table 1). Most were female (79.4%) and white (84.7%) with a mean (sd) age of 56.0 (14.3) years. Nearly one-third (30.6%) of IMID participants were taking biologics or advanced therapies.

Running title: COVID-19 vaccination in IMIDs

Table 1 Demographics, vaccines administered, self reported IMID flare, and COVID-19 history of participants

|                                         | <b>IA<br/>N=78</b> | <b>SARDs<br/>N=84</b> | <b>IBD<br/>N=93</b> | <b>MS<br/>N=72</b> | <b>All IMIDs<br/>N=327</b> |
|-----------------------------------------|--------------------|-----------------------|---------------------|--------------------|----------------------------|
| Age, years (mean SD)                    | 61.9(11.8)         | 55.7(13.4)            | 53.7(16.4)          | 53.1(13.5)         | 56.0 (14.3)                |
| Female n (%)                            | 66 (84.6)          | 75 (89.3)             | 59(63.4)            | 59 (81.9)          | 259 (79.4)                 |
| White n (%)                             | 66(84.6)           | 64 (76.2)             | 79(84.9)            | 68 (94.4)          | 277 (84.7)                 |
| Education                               |                    |                       |                     |                    |                            |
| Years of school (median/IQR)            | 15.0(4.5)          | 16.0(4.3)             | 16.0(4.0)           | 16.0(5.0)          | 16.0(4.0)                  |
| Comorbidity (n %) <sup>2</sup>          |                    |                       |                     |                    |                            |
| Cardiovascular                          | 35 (44.9)          | 31 (36.9)             | 26 (28.0)           | 22 (30.5)          | 115(35.1)                  |
| Pulmonary                               | 8 (10.2)           | 24 (28.6)             | 15 (16.1)           | 8 (11.1)           | 55(16.8)                   |
| Diabetes                                | 13 (19.7)          | 3 (3.7)               | 3 (3.4)             | 5 (6.9)            | 24(7.3)                    |
| Other endocrine                         | 25 (32.1)          | 24 (28.6)             | 20 (21.5)           | 20 (27.8)          | 90(27.4)                   |
| Renal disease                           | 2 (3.0)            | 9 (11.0)              | 4 (4.3)             | 0 (0.0)            | 15(4.6)                    |
| Cancer                                  | 15 (19.2)          | 10 (11.9)             | 12 (12.9)           | 56.9)              | 43 (13.10)                 |
| Mental Health                           | 17 (21.8)          | 27 (32.9)             | 27 (29.0)           | 22 (30.6)          | 94(28.7)                   |
| Total (median range)                    | 2.5(0-10)          | 3(0-10)               | 2(0-10)             | 2(0-6)             | 2(0-10)                    |
| BMI (mean SD)                           | 27 (6.6)           | 28.0 (7.8)            | 27.2 (6.1)          | 28.0 (6.2)         | 27.7 (6.7)                 |
| IMID Treatment level <sup>1</sup> n (%) |                    |                       |                     |                    |                            |
| Immunomodulators                        | 4(5.1)             | 25 (30.5)             | 21 (22.6)           | 28(38.9)           | 78 (23.9)                  |
| Immunosuppressants                      | 27 (34.6)          | 42 (51.2)             | 10 (10.8)           | 0 (0.0)            | 79 (24.2)                  |
| Biologics/JAKi                          | 37(47.4)           | 7 (8.5)               | 41 (44.1)           | 14 (19.4)          | 99 (30.3)                  |
| - anti-TNF (n)                          | 22                 | 2                     | 28                  | 0                  | 52                         |
| - anti-B cell (n)                       | 5                  | 6                     | 0                   | 10                 | 21                         |
| - other or JAKi (n)                     | 9                  | 0                     | 13                  | 4                  | 26                         |
| None                                    | 11 (14.1)          | 9 (10.7)              | 21(22.6)            | 30 (41.7)          | 71 (21.7)                  |
| Vaccine type V1 n (%) <sup>3</sup>      |                    |                       |                     |                    |                            |
| CHAdOx1                                 | 15 (19.5)          | 28 (33.3)             | 17 (18.3)           | 26 (36.1)          | 86 (26.4)                  |
| BNT                                     | 60 (77.9)          | 56 (66.7)             | 66 (71.0)           | 39 (54.2)          | 221 (67.8)                 |
| mRNA1273                                | 2 (2.6)            | 6 (7.1)               | 10 (10.8)           | 7 (9.7)            | 25 (7.7)                   |
| Vaccine type V2 n (%) <sup>3</sup>      |                    |                       |                     |                    |                            |
| CHAdOx1                                 | 2 (2.6)            | 3 (3.6)               | 3 (3.2)             | 1 (1.4)            | 9 (2.7)                    |
| BNT                                     | 65 (84.4)          | 58 (68.7)             | 60 (65.2)           | 54 (75.0)          | 236 (72.8)                 |
| mRNA1273                                | 16 (13.0)          | 23 (27.7)             | 29 (31.5)           | 17 (23.6)          | 79(24.4)                   |
| Vaccine type V3 n/N (%) <sup>3</sup>    |                    |                       |                     |                    |                            |
| CHAdOx1                                 | 0                  | 0                     | 1 (1.3)             | 1 (1.6)            | 2 (0.7)                    |
| BNT                                     | 54 (71)            | 58 (78.4)             | 49 (66.2)           | 39 (61.9)          | 200 (71.2)                 |
| mRNA1273                                | 16 (21.1)          | 16 (21.6)             | 24 (32.4)           | 23 (36.5)          | 79 (28.1)                  |
| Other                                   | 0                  | 0 (0)                 | 1 (1.4)             | 1 (1.6)            | 2 (0.7)                    |
| Vaccine type V4 n/N (%) <sup>3</sup>    |                    |                       |                     |                    |                            |
| CHAdOx1                                 | 0 / (0)            | 1 (2.7)               | 0 (0)               | 0 (0)              | 1 (0.8)                    |
| BNT                                     | 25 (69.4)          | 28 (75.7)             | 25 (64.1)           | 12 (70.6)          | 90 (69.8)                  |

Running title: COVID-19 vaccination in IMIDs

|                                          |               |               |             |             |               |
|------------------------------------------|---------------|---------------|-------------|-------------|---------------|
| mRNA1273                                 | 10 (27.8)     | 8 (21.6)      | 14 (35.9)   | 2 (11.8))   | 34 (26.4)     |
| Other                                    | -             | -             | -           | 3 (17.6)    | 3 (2.3)       |
| Vaccines for V1 and V2 n (%)             |               |               |             |             |               |
| CHAdOx1-- BNT                            | 9 (11.5)      | 10 (11.9)     | 4 (4.3)     | 17 (23.6)   | 40(12.2)      |
| CHAdOx1 - mRNA1287                       | 4 (5.1)       | 15(17.9)      | 11 (11.8)   | 8 (11.1)    | 38 (11.6)     |
| BNT – mRNA1273 or<br>mRNA1273-BNT        | 4 (5.1)       | 5 (6.0)       | 10 (10.8)   | 2 (2.8)     | 21 (6.4)      |
| BNT-CHAdOx1                              | 0(0)          | 0(0)          | 1 (1.1)     | 0(0)        | 1 (0.3)       |
| CHAdOx1-CHAdOx1                          | 2 (2.6)       | 3 (3.6)       | 2 (2.2)     | 1 (1.4)     | 8 (2.4)       |
| BNT- BNT                                 | 56(71.8)      | 46 (54.8)     | 55 (59.1)   | 37 (51.4)   | 194 (59.3)    |
| mRNA1273 -mRNA1273                       | 2 (2.6)       | 4 (4.8)       | 9 (9.7)     | 7 (9.7)     | 22 (6.7)      |
| Vaccine interval                         |               |               |             |             |               |
| Days between V1 and V2<br>median (range) | 66 (21-97)    | 62 (20-188)   | 57 (20-98)  | 59 (26-97)  | 60 (20-188)   |
| Self-report IMID flare <sup>4,5</sup>    |               |               |             |             |               |
| 1 month post V1 n/N (%)                  | 12/44 (27.3)  | 10/44 (22.7)  | 0/44 (0)    | 1/41 (2.4)  | 23/173 (13.3) |
| 1 month post V2 n/N (%)                  | 9/56 (16.1)   | 9/58 (8.6)    | 0/67 (0)    | 2/69 (2.9)  | 20/250 (8.0)  |
| 1 month post V3 n/N (%)                  | 11/57 (19.3)  | 19/63 (30.2)  | 2/62 (3.3)  | 1/61 (1.6)  | 33/243 (13.6) |
| 1 month post V4 n/N (%)                  | 6/38 (15.8)   | 12/57 (21.1)  | 4/38 (8.3)  | 1/24 (4.2)  | 23/157 (14.6) |
| 1 month post any V n/N(%)                | 38/195 (19.5) | 50/202 (24.8) | 6/211 (2.8) | 5/129 (3.9) | 99/803 (12.2) |
| COVID-19 illness -ever <sup>5</sup>      |               |               |             |             |               |
| None                                     | 43 (55.1)     | 38 (46.3)     | 46 (50.0)   | 31 (43.1)   | 158 (48.8)    |
| Suspected but not tested                 | 27 (34.6)     | 29 (35.4)     | 22 (23.9)   | 24 (33.3)   | 112(34.6)     |
| COVID-19 PCR +ve                         | 8 (10.3)      | 13 (15.9)     | 14 (15.2)   | 17 (23.6)   | 52 (16.0)     |
| COVID-19 +ve hospitalized                | 0 (0.0)       | 2 (2.4)       | 0 (0.0)     | 0 (0.0)     | 2 (0.6)       |

IA=inflammatory arthritis (Rheumatoid Arthritis N=60, Psoriatic arthritis N=8, other Spondyloarthropathy N=3, other IA N=7); SARDs = systemic autoimmune rheumatic disease (systemic lupus erythematosus N=48, myopathy N=5, vasculitis N=7 other or unknown SARDs N=24) ; IBD = inflammatory bowel disease (crohn's disease N=43); MS= multiple sclerosis (relapsing=remitting N=51, secondary progressive N=11, primary progressive N=4, unknown N=2) ; IMID = immune mediated inflammatory disease; FT=full time; PT= part time; BMI=body mass index; JAKi= janus kinase inhibitor; TNF= tumor necrosis factor inhibitor; BNT= BNT162b2 vaccine V1= first vaccine; V2 = second vaccine, V3 = third vaccine; V4 = fourth vaccine; NA=not available, PCR= polymerase chain reaction; IQR = interquartile range

<sup>1</sup> IMID treatment based on most aggressive combination if on multiple agents. 1 RA subject on only prednisone monotherapy. Medication data missing for 2 SARDs subjects. Other therapy N=26 (ustekinumab n=6, vedolizumab n=7, abatacept n=1, tofacitinib n=4, tocilizumab n=3, fingolimod n=2, alemtuzumab n=1, natalizumab n=1, upadacitinib n=1)]

<sup>2</sup> cardiovascular disease includes ischemic heart disease, congestive heart failure, valvular heart disease peripheral vascular disease stroke or transient ischemic attack or hypertension; respiratory disease

Running title: COVID-19 vaccination in IMIDs

1  
2  
3 includes asthma or chronic obstructive pulmonary disease, other endocrine includes thyroid disease,  
4 hypercholesterolemia  
5

6 <sup>3</sup> Vaccine data available for V1 N=326 (77 IA, 84 SARDS, 72 MS 93 IBD); V2 N=324 (77IA, 83 SARDS, 72  
7 MS 92 IBD); V3 N=281 (76 IA, 74 SARDS, 63 MS, 74 IBD) V4 N=128 (35 IA, 37 SARDS 39 IBD 17 MS).  
8

9 <sup>4</sup> Flare assessed by the following questions: IA: "Are you having a flare? SARDS: "In the past 3 months  
10 have you had a disease flare (A flare is when your disease gets worse)? Yes moderate or severe flare;  
11 IBD: In the past 6 months my disease has been: Constantly active, giving me symptoms every day, or  
12 often active, giving me symptoms most days or sometimes active, giving me symptoms on some days  
13 (for instance 1-2 days/week); MS Do you feel there has been a change in your MS since your last visit?  
14 "My multiple sclerosis is much worse and in a flare"  
15  
16

17 Flare rate across IMIDs 1 month after any vaccine  $\chi^2$  72.9  $p < 0.001$ ; Flare rate post V1 across IMIDs  $\chi^2$   
18 21.8  $p < 0.001$ . Flare rate post V2 across IMIDs  $\chi^2$  17.7  $p < 0.001$ ; Flare rate post V3 across IMIDs  $\chi^2$   
19 29.4  $p < 0.001$ ; Flare rate post V4 across IMIDs  $\chi^2$  10.3  $p = 0.02$ . IMID Flare rate across vaccination visits  
20  $\chi^2$  7.4  $p = 0.06$ .  
21  
22

23 <sup>5</sup> Self-reported over course of study; COVID-19 illness data missing for 2 SARDS and 1 IBD participant.  
24  
25  
26  
27  
28  
29  
30  
31  
32  
33  
34  
35  
36  
37  
38  
39  
40  
41  
42  
43  
44  
45  
46  
47  
48  
49  
50  
51  
52  
53  
54  
55  
56  
57  
58  
59  
60

Running title: COVID-19 vaccination in IMIDs

1  
2  
3 Samples of adequate quality were obtained following the first vaccine at 1 month (n=175) and 3  
4 months (n=44), following the second vaccine at 1 month (n=234) and 3 months (n=246),  
5  
6 following the third vaccine at 1 month (n=215) and following the fourth vaccine at 1 month  
7  
8 (n=85). For 31 participants, DBS samples were of inadequate quality and a serum sample from  
9  
10 the same day was substituted. In paired DBS and serum tests from 208 subjects,  
11  
12 seroconversion and titers were highly concordant (Kendall's tau b correlation coefficient anti-  
13  
14 RBD BAU/ml=0.93; anti-S1 BAU/ml= 0.92) (Supplementary Figure 3). Pre-pandemic sera were  
15  
16 seronegative for anti-SarsCo-V2 antibodies.

17  
18 Following the first vaccine, 60% of IMID participants seroconverted (Table 2). Following the  
19  
20 second vaccine, seroconversion rates increased to 91% (p=0.1 across IMIDs for both anti-S1 and  
21  
22 anti-RBD). The change in anti-S1 seropositivity between first and second vaccines was  
23  
24 significant (anti-S1 all IMIDs Chi<sup>2</sup> 82.2 p<0.0001; IA Chi<sup>2</sup> 40.5 p<0.0001; SARsDs Chi<sup>2</sup> 18.5  
25  
26 p<0.0001; IBD Chi<sup>2</sup>16.9 p<0.0001; MS Chi<sup>2</sup> 4.1 p=0.04 and anti-RBD all IMIDs Chi<sup>2</sup> 55.1  
27  
28 p<0.0001; IA Chi<sup>2</sup> 31.6 p<0.0001; SARsDs Chi<sup>2</sup> 18.8 p<0.0001; IBD Chi<sup>2</sup> 8.4 p<0.01; MS Chi<sup>2</sup> 5.1  
29  
30 p=0.02). Of the 20 participants who were seronegative after the second vaccine and had data  
31  
32 following the third vaccine, 8/15 (53.3) seroconverted after the third vaccine. Seroconversion  
33  
34 rates for both anti-S1 and anti-RBD after the third and fourth vaccines were greater than 95%.  
35  
36  
37  
38  
39  
40  
41  
42  
43  
44  
45  
46  
47  
48  
49  
50  
51  
52  
53  
54  
55  
56  
57  
58  
59  
60

Running title: COVID-19 vaccination in IMIDs

Table 2 Seroconversion rates one month following each COVID-19 vaccine

| Seroconversion         | IA            | SARDs         | IBD            | MS            | All IMIDs       |
|------------------------|---------------|---------------|----------------|---------------|-----------------|
| Post V1                |               |               |                |               |                 |
| Anti- S1               | 14/47 (29.8%) | 21/47 (44.7%) | 33/48(68.8%)   | 23/33 (69.7%) | 91/175 (52.0%)  |
| Anti-RBD               | 18/47 (38.2%) | 22/47 (46.8%) | 40/48 (83.3%)  | 23/33 (69.7%) | 103/175 (58.9%) |
| Anti-NC                | 1/47 (2.1%)   | 0/48 (0%)     | 0/47 (0%)      | 1/33 (3%)     | 2/175 (1.1%)    |
| Post V2 <sup>1</sup> , |               |               |                |               |                 |
| Anti-S1 <sup>2</sup>   | 50/55 (90.9%) | 46/54 (85.1%) | 62/64 (96.9%)  | 53/61 (86.9%) | 214/234 (91.5%) |
| Anti-RBD <sup>3</sup>  | 50/55 (90.9%) | 47/54 (87.0%) | 63/64 (98.4%)  | 54/61 (88.5%) | 211/234 (90.2%) |
| Anti-NC                | 1/55 (1.8%)   | 0/57 (0%)     | 1/64 (1.6%)    | 1/61 (1.6%)   | 3/234 (1.3%)    |
| Post V3                |               |               |                |               |                 |
| Anti-S1                | 51/52 (98.1%) | 57/62 (91.9%) | 56/56 (100.0%) | 41/45 (91.1%) | 205/215 (95.3%) |
| Anti-RBD               | 51/52 (98.1%) | 56/62 (90.3%) | 56/56 (100.0%) | 41/45 (91.1%) | 204/215 (94.9%) |
| Anti-NC                | 2/52 (3.8%)   | 3/62 (4.8%)   | 2/56 (3.6%)    | 2/45 (4.4%)   | 9/215 (4.2%)    |
| Post V4                |               |               |                |               |                 |
| Anti-S1                | 31/32 (96.9%) | 21/23 (91.3%) | 27/27 (100%)   | 3/3 (100%)    | 82/85 (96.5%)   |
| Anti-RBD               | 31/32 (96.9%) | 21/23 (91.3%) | 27/27 (100%)   | 3/3 (100%)    | 82/85 (96.5%)   |
| Anti-NC                | 3/32 (9.4%)   | 4/23 (17.4%)  | 3/27 (11.1%)   | 0/3 (0.0%)    | 10/85 (11.8%)   |

IA=inflammatory arthritis; SARDs = systemic autoimmune rheumatic disease; IBD = inflammatory bowel disease; MS= multiple sclerosis; IMID = immune mediated inflammatory disease; V1 = first vaccine; V2 = second vaccine; V3= third vaccine; V4=fourth vaccine

<sup>1</sup> seroconversion V1 to v2 across IMIDs anti-S1 Chi<sup>2</sup> 82.2 p<0.0001; anti-RBD Chi<sup>2</sup> 55.1 p<0.0001

<sup>2</sup> change in anti-S1 seropositivity V1 to V2 IA Chi<sup>2</sup> 40.5 p<0.0001, SARDs Chi<sup>2</sup> 18.5 p<0.0001 IBD Chi<sup>2</sup>16.9 p<0.0001; MS Chi<sup>2</sup> 4.1 p=0.04

<sup>3</sup> change in anti-RBD seropositivity V1 to V2 IA Chi<sup>2</sup> 31.6 p<0.0001, SARDS Chi<sup>2</sup> 18.8 p<0.0001, IBD Chi<sup>2</sup> 8.4 p<0.01, MS Chi<sup>2</sup> 5.1 p=0.02.

Post-V2 anti-S1 seroconversion rates for IMIDs were lower compared to those of age and sex-matched controls (anti-S1 seropositive controls 363/370 (98.1%) vs IMIDs X<sup>2</sup> 14.5 p<0.0001) but similar for anti-NC (anti-NC seropositive controls 13/370 (3.5%) vs IMIDs Chisq-2.9 p=0.1).

Matched population-based estimates were not available for subsequent vaccinations.

Anti-RBD and anti-S1 IgG titres of those who seroconverted increased between the 1 month post-V1 and 1 month post-V2 time points for combined IMIDs and for each IMID individually



Running title: COVID-19 vaccination in IMiDs

1  
2  
3 (Figure 1) (p values all  $p < 0.0001$ ). Anti-RBD and anti-S1 titers declined by 3 months post-second  
4 vaccine (p values for combined IMiDs  $p < 0.0001$ ; SARDs  $p < 0.001$ ; IBD  $p < 0.001$ , IA  $p < 0.001$  and  
5 MS  $p < 0.001$ ) but increased 1 month post-third vaccine (p value all  $p < 0.0001$ ). Titers of anti-RBD  
6 and anti-Spike were similar between 1 month post-third vaccine and 1 month post-vaccine  
7 fourth vaccine. Within individuals, paired analysis of titers across visits yielded similar findings.  
8  
9

10  
11  
12  
13 Over the study, 99 (30.6%) IMiD participants received heterologous/mixed vaccines for their  
14 first two vaccines (Table 1). For those with one month post-V2 serology data, individuals  
15 receiving homologous vector vaccines had the lowest seroconversion rates and titers for both  
16 anti-RBD and anti-S1 responses. Individuals receiving either mRNA vaccine following a vector  
17 vaccine had comparable anti-RBD and anti-Spike titers as those receiving two mRNA vaccines  
18 (Figure 2). Anti-RBD and anti-S1 seropositivity and titers one month following the third vaccine  
19 were similar among individuals receiving different combinations of vaccines for their first two  
20 vaccines (Supplemental Table 2, Supplemental Figure 4).  
21  
22  
23  
24  
25  
26  
27  
28  
29  
30

31 Participants over age 65 years, diagnosed with MS, or taking biologics, were less likely to  
32 seroconvert by the second vaccine in multivariable models. Results were similar if  
33 seroconversion was defined as seropositivity to anti-RBD and/or anti-Spike (Table 3). Vaccine  
34 mix (vector-mRNA versus mRNA-mRNA) did not impact seroconversion when included in the  
35 regression models. Most of the 20 individuals who did not seroconvert after V2 were taking  
36 immunosuppressives (mycophenolate  $n=5$ ; methotrexate  $n=2$ , azathioprine  $n=1$ ) or biologics (B  
37 cell targeting currently or previously  $n=8$ , anti-TNF  $n=2$ , other  $n=2$ ) (Supplementary Table 3).  
38  
39  
40  
41  
42  
43  
44  
45  
46  
47  
48  
49  
50  
51  
52  
53  
54  
55  
56  
57  
58  
59  
60

Running title: COVID-19 vaccination in IMIDs

Table 3 Clinical variables associated with seroconversion one month following second vaccine .  
RBD = Receptor binding domain; S1 = Spike protein; Ref = reference category; NA = not able to compute.

|                              | <b>Post second vaccine<br/>OR (95% CI)</b> | <b>P value</b> |
|------------------------------|--------------------------------------------|----------------|
| <b>RBD seroconversion</b>    |                                            |                |
| <b>Sex</b>                   |                                            |                |
| Male                         | Ref                                        | 1.0            |
| Female                       | 1.0 (0.21-4.71)                            |                |
| <b>Age</b>                   |                                            |                |
| >65 years                    | Ref                                        | 0.002          |
| ≤ 65 years                   | 7.4 (2.04-27.06)                           |                |
| <b>IMID</b>                  |                                            |                |
| IBD                          | Ref                                        | <0.001         |
| IA                           | 0.2 (0.02-2.65)                            |                |
| SARDs                        | 0.05 (0.003-0.79)                          |                |
| MS                           | 0.009 (0.001-0.13)                         |                |
| <b>Immune therapy</b>        |                                            |                |
| None                         | Ref                                        | 0.004          |
| Other immunomodulator        | NA                                         |                |
| Immunosuppressant            | 0.03 (0.002-0.33)                          |                |
| Biologics/advanced therapies | 0.02 (0.002-0.16)                          |                |
| <b>S1 seroconversion</b>     |                                            |                |
| <b>Sex</b>                   |                                            |                |
| Male                         | Ref                                        | 0.85           |
| Female                       | 1.1 (0.29-4.52)                            |                |
| <b>Age</b>                   |                                            |                |
| >65 years                    | Ref                                        | 0.02           |
| ≤ 65 years                   | 3.9 (1.29-11.62)                           |                |
| <b>IMID</b>                  |                                            |                |
| IBD                          | Ref                                        | <0.001         |
| RA                           | 0.5 (0.07-3.02)                            |                |
| SARDs                        | 0.1 (0.01-0.91)                            |                |
| MS                           | 0.03 (0.003-0.20)                          |                |
| <b>Immune therapy</b>        |                                            |                |
| None                         | Ref                                        | 0.01           |
| Other immunomodulator        | NA                                         |                |
| Immunosuppressant            | 0.06 (0.006-0.51)                          |                |
| Biologics/advanced therapies | 0.04 (0.007-0.27)                          |                |

Running title: COVID-19 vaccination in IMiDs

We evaluated the impact of vaccine mix and treatment on waning of anti-SARSCoV2 titers between 1 and 3 months following the second vaccination. In paired analysis the decline in titers between 1 month post V2 and 3 months post V2 for anti-RBD and anti-S1 differed across vaccine mixtures (anti-RBD  $p=0.026$ ; anti-S1  $p=0.02$ ) however this was mainly due to minimal titer changes for individuals receiving homologous vector vaccines who had lower titers overall. We observed greater titer change between those that received vector/mRNA versus mRNA/mRNA combinations for S1, but did not see differences in RBD titer change between those that received vector/mRNA versus mRNA/mRNA combinations. [median (IQR) anti-S1 mixed 1591.6 (3002.7) vs homologous mRNA 1086.3 (1608.8)  $p=0.021$ ; anti-RBD mixed 1469.9 (2086.5) vs homologous mRNA 1124.5 (1402.4)  $p=0.051$ ]. For individuals receiving homologous mRNA (BNT/BNT vs mRNA1273/mRNA1273) there was no difference in waning for anti-RBD or anti-S1. [RBD titer change anti-RBD: BNT/BNT 1080.6 (2405) vs mRNA1273/mRNA1273 1434.9 (2465.1)  $p=0.58$ ; anti-S1 BNT/BNT 1051.9 (1674.1) vs mRNA1273/mRNA1273 1567.5 (2481.9)  $p=0.39$ ]. There was no difference in waning for individuals receiving homologous mRNA vs mixed vector/mRNA of the same type for anti-RBD or anti-S1. There was no difference in titer change across different biologic categories (anti-TNF versus B cell depletion versus other biologic; anti-RBD  $p=0.30$ ; anti-S1  $p=0.14$ ) (Supplemental Figure 5).

Twenty-five participants were seropositive for anti-NC antibodies on at least one visit (8 IA, 8 SARDs, 3 MS, 6 IBD) and for 4 of these individuals, seropositivity persisted with declining titers across consecutive visits spanning 3 to 6 months. All but one MS participant were also anti-RBD and anti-S1 seropositive. Anti-RBD and anti-S1 titers were higher in anti-NC positive compared to anti-NC negative samples [median (range; IQR) anti-RBD 11755.3 (20373.1) vs 1248.0 (27-78936.2; 53278.7); anti-Spike 11254.4 (77.3-68157.0; 15352.6) vs 1313.1 (37.4-87401.3; 3106.6)]. Of the 25 seropositive individuals, 9 were asymptomatic, 10 were taking biologics (5 anti-TNFs, 3 current or past B cell depletion, 4 other biologics/advanced therapies), 7 immunosuppressives (5 methotrexate, 2 azathioprine), 7 immunomodulating agents alone, and 1 MS participant was on no IMiD medication (Supplemental Table 4). Although the rates of

Running title: COVID-19 vaccination in IMIDs

1  
2  
3 anti-NC positivity increased over the course of the study, anti-NC titers did not vary by vaccine  
4 status (heterologous or homologous) nor by date tested (Table 2, Supplementary Figure 6).  
5

6  
7 Most participants reported no COVID-19 infection symptoms during the study, including 9  
8 individuals who tested seropositive for anti-NC antibodies, whereas 113 (35.7%) of participants  
9 reported mild symptoms consistent with COVID-19 infection but did not have community-based  
10 confirmatory testing by either polymerase chain testing before Dec 2021 or self-administered  
11 testing after Dec 2021. All COVID-19 infections with positive community-based testing were  
12 also anti-NC positive. Only two confirmed COVID-19 infections required hospitalization. Both  
13 had received 3 vaccines and had moderate levels of anti-NC (69.4 and 22.8 BAU/ml).  
14  
15 (Supplementary Figure 7)  
16  
17  
18  
19  
20  
21

22  
23 Self-reported disease activity/status scores were similar across visits for each IMID (Figure 3).  
24 Rates of moderate or severe self-reported IMID flares were similar across vaccines. MS and IBD  
25 participants had lower rates of self-reported flare compared to IA and SARDs [n/N (%) with self-  
26 reported flare after any vaccine MS 5/129 (3.9), IA 38/195 (19.5), SARDs 50/202 (24.8); IBD  
27 6/211 (2.8) (Chi<sup>2</sup> 72.9 p<0.001]. Self reported IMID flare rates were similar following each  
28 vaccination (Table 1).  
29  
30  
31  
32  
33  
34  
35  
36

## 37 Discussion

38  
39 This single center cohort study evaluated the safety and immunogenicity of SARS-COV-2  
40 vaccines in IMIDs and confirmed relative safety with no increase in IMID disease activity despite  
41 self-reported disease flare rates of 12% following four vaccinations. Fewer than two-thirds  
42 seroconverted after the first vaccine. Seroconversion rates differed by vaccine type with higher  
43 titres of anti-RBD and anti-Spike responses generated by mRNA vaccines compared to the  
44 available vector vaccine. Individuals who received an initial vector vaccine followed by a mRNA  
45 vaccine had vaccine induced titers that were comparable to those following a homologous  
46 mRNA vaccine course and were higher than those who received homologous vector vaccines.  
47  
48 Anti-SARS-CoV-2 antibody titers declined 3 months after the second vaccine but improved after  
49  
50  
51  
52  
53  
54  
55  
56  
57  
58  
59  
60

Running title: COVID-19 vaccination in IMIDs

1  
2  
3 the third and fourth vaccines. Most individuals who did not produce adequate humoral  
4 responses to the vaccine were taking immunosuppressants or biologics.  
5  
6

7  
8 Our findings are consistent with emerging clinical trial and cohort data from the general  
9 population and other immunocompromised groups. Prior studies of rheumatic disease flare  
10 post-COVID-19 vaccination have produced mixed results however, most found no major  
11 concerns<sup>7</sup>. Data for IBD and MS are also reassuring<sup>23 24</sup>. Several studies have found lower  
12 seroconversion rates and anti-SARS-CoV-2 titers in IMIDs compared to the general population<sup>25</sup>  
13 <sup>26</sup>. While older age plays a role, the primary reason for reduced responses appears due to  
14 medication use with the greatest impact from biologics, especially B-cell depleting therapies,  
15 fingolimod, anti-tumor necrosis factor agents, and Janus kinase inhibitors, and with DMARDs  
16 such as mycophenolate and methotrexate. Hydroxychloroquine does not impair vaccine  
17 responses. Proposed strategies to optimize responses for patients on these medications  
18 include holding medication around the time of vaccination and delaying vaccination following  
19 infusion of B-cell targeted therapies<sup>27 28</sup>. For B cell therapies, humoral immune responses  
20 remain suboptimal even after third doses especially for individuals with low pre-vaccination cell  
21 counts<sup>29-31</sup>. Reassuringly, T cell responses are induced although possibly impaired<sup>26 31 32</sup>.  
22  
23  
24  
25  
26  
27  
28  
29  
30  
31  
32

33  
34 Heterologous vaccine administration increased as vaccine availability and data on safety and  
35 immunogenicity evolved, thereby allowing evaluation of the role of homologous versus  
36 heterologous vaccine administration for people with IMIDs. In the general population, clinical  
37 trials and cohort studies of mixing vaccine types that compared homologous vector,  
38 homologous mRNA and heterologous vector/mRNA vaccine courses observed greater immune  
39 responses (humoral and cellular) with mRNA vaccines than vector vaccines and that in  
40 individuals receiving a vector vaccine first, a mRNA vaccine improved vaccine responses to  
41 levels comparable to those of the homologous mRNA vaccines<sup>12-14 33</sup>. Our observations in IMIDs  
42 confirm that second, and at least third vaccination courses are needed to generate acceptable  
43 humoral immunogenicity, that mRNA vaccines can overcome limited responses to vector  
44 vaccines, and that the type of mRNA administered has minimal impact on waning vaccine titers  
45 following the second vaccination.  
46  
47  
48  
49  
50  
51  
52  
53  
54  
55  
56  
57  
58  
59  
60

Running title: COVID-19 vaccination in IMIDs

1  
2  
3 The clinical findings of this report reflect data collected during intermittent public health  
4 mandated societal restrictions, before and during the early period when the Omicron variant  
5 was circulating in our region, and before bivalent vaccines were available<sup>11</sup>. Over one-third  
6 reported mild symptoms or were suspected to have had COVID-19 illness but less than 10% had  
7 confirmed COVID-19 infection. Despite complete vaccination, infection and concerning  
8 symptoms increased as public health restrictions were relaxed, the prevalence of SARS-CoV-2  
9 virus increased, and new variants of concern emerged. This emphasizes the need for ongoing  
10 COVID-19 surveillance to inform personal health practices given the real concerns expressed by  
11 many people with IMIDs, even those who are fully vaccinated. Recent studies have described  
12 reduced sensitivity of the anti-NC assay following vaccination that is only partially explained by  
13 viral load.<sup>34</sup> In this study, all participants with COVID-19 infection confirmed with community  
14 based testing were also anti-NC positive and while the number of anti-NC +ve participants  
15 increased over the study, we did not see any difference in anti-NC IgG levels with number of  
16 vaccines or by calendar month.  
17  
18

19 We acknowledge limitations of this work. Our sample size was relatively small for each IMID;  
20 however, we have collected extensive patient-reported data combined with biologic samples  
21 from individuals representing four common IMID groups, allowing cross-disease and cross-  
22 specialty comparisons which are not widely reported. We assessed IMID disease activity using  
23 validated patient self-reported disease specific indices and flare questions although these  
24 questionnaires can be subject to recall bias. Ideally patient reported IMID activity would be  
25 supplemented with clinician assessed measures however both patient preferences and COVID-  
26 19 pandemic travel restrictions impacted the feasibility of in person clinical assessments for all  
27 participants. Self reported of disease activity/state measures correlate with clinical assessment  
28 measures<sup>19 35-37</sup>. As expected for these IMIDs, our population was predominantly female thus  
29 we lack power to detect sex-based differences in our outcomes and there is uncertainty as to  
30 how they would reflect a male predominant cohort. We focused on humoral vaccine induced  
31 immunogenicity using antibody seropositivity and titres as surrogates for vaccine induced  
32 protection. Antibody binding titers have been shown to correlate with neutralizing and cellular  
33 responses which in turn correlate with vaccine efficacy, although the titers needed to achieve  
34  
35  
36  
37  
38  
39  
40  
41  
42  
43  
44  
45  
46  
47  
48  
49  
50  
51  
52  
53  
54  
55  
56  
57

Running title: COVID-19 vaccination in IMIDs

1  
2  
3 good vaccine efficacy may differ for anti-Spike and anti-RBD<sup>38</sup>. Further work is needed to  
4 evaluate the neutralization capacity of vaccine induced antibodies to SARS-COV-2 and emerging  
5 variants of concern including Omicron. We did not evaluate cellular immune responses yet  
6 these are critical for long term anti-viral protection especially for individuals without robust  
7 antibody responses. We were not able to confirm prior reports of the impact of different  
8 biologic categories on vaccine titers however our study was not powered for this question.  
9 Additional studies are needed to evaluate if there are important differences across mRNA  
10 vaccines and vaccine intervals for optimal protection against variants of concern to inform  
11 recommendations for additional vaccinations in IMIDs. Importantly, it is still unclear what level  
12 of humoral or cellular immunogenicity is optimal to protect IMIDs against serious COVID-19  
13 infection although population-based vaccine efficacy data are emerging for some  
14 immunocompromised groups<sup>39</sup>.

15  
16 We conclude that most individuals with IMID can safely receive COVID-19 vaccines without risk  
17 of disease flare. At least two doses that include a mRNA vaccine, either homologous or mixed  
18 vaccine types are needed to generate humoral immunity comparable to the general population.  
19 The observed decline in humoral responses support the use of third and subsequent vaccine  
20 doses for IMIDs. These data can be used to direct vaccine policies in countries where vaccine  
21 rates have been lagging or where supply has been limited.  
22  
23  
24  
25  
26  
27  
28  
29  
30  
31  
32  
33  
34  
35  
36  
37  
38  
39  
40  
41  
42  
43  
44  
45  
46  
47  
48  
49  
50  
51  
52  
53  
54  
55  
56  
57  
58  
59  
60

Running title: COVID-19 vaccination in IMiDs

Disclaimer: The results and conclusions are those of the authors and no official endorsement by University of Manitoba, Manitoba Shared Health, the Public Health Agency of Canada or Research Manitoba is intended nor should be inferred

Acknowledgements: We acknowledge the technical expertise of the NLHRS including A. Harris, R.Fabia, K.Cachero, H.Ellis, S.Simon, K.Peladeau and J.Walker, and the assistance of M. Moya, M. Sevilla, S. Nanayakkara, T Shcholak, and J. Remple.

#### Author contributions:

CA Hitchon contributed to the study conceptualization, funding acquisition, recruitment of participants, data analysis and interpretation, and writing of original and final manuscript drafts. C Mesa contributed to the data acquisition and interpretation by conducting and analyzing the SARS-CoV-2 assays and reviewed the draft manuscript. C Bernstein contributed to the study conceptualization, funding acquisition, recruitment of participants and both review and editing of the manuscript. RA Marrie contributed to the study conceptualization, funding acquisition, recruitment of participants and both review and editing of the manuscript. C Card contributed to the study conceptualization, review and editing of the manuscript. S OBrien contributed resources including data for the controls, and both review and editing of the manuscript. J Kim contributed to the study conceptualization, funding acquisition, provided resources for conducting and interpreting the SARS-CoV2 assays and contributed to the review and editing of the manuscript. All authors contributed to critical review of manuscript and approved the final version and are accountable for the work.

Data sharing statement: Limited deidentified data from consenting participants will be made available to qualified investigators for research purposes consistent with those of the original study documents and participant consent following submission of a formal proposal, and approval by the study team, the University of Manitoba, and Shared Health and completion of signed data access agreements.



Running title: COVID-19 vaccination in IMiDs

## Disclosures

CH: unrelated grant funding from Pfizer; Advisory board for Astra-Zeneca Canada for unrelated product, unrelated research funds from Research Manitoba, Health Sciences Center foundation, International League of Associations for Rheumatology, unrelated educational funds from the Royal College of Physicians and Surgeons of Canada.

RAM: Ruth Ann Marrie receives research funding from: CIHR, Research Manitoba, Multiple Sclerosis Society of Canada, Multiple Sclerosis Scientific Foundation, Crohn's and Colitis Canada, National Multiple Sclerosis Society, the CMSC, the Arthritis Society, Brain Canada, and US Department of Defense. She is a co-investigator on a study funded in part by Biogen Idec and Roche Canada. She is supported by the Waugh Family Chair in Multiple Sclerosis.

CNB: Dr Bernstein is supported by the Bingham Chair in Gastroenterology. Dr. Bernstein has served on advisory Boards for AbbVie Canada, Amgen Canada, Bristol Myers Squibb Canada, Roche Canada, Janssen Canada, Sandoz Canada, Takeda Canada, and Pfizer Canada; Consultant for Mylan Pharmaceuticals and Takeda; Educational grants from Abbvie Canada, Pfizer Canada, Takeda Canada, and Janssen Canada. Speaker's panel for Abbvie Canada, Janssen Canada, Pfizer Canada, and Takeda Canada. Received research funding from Abbvie Canada, Bristol Myers Squibb Canada, Sandoz Canada and Pfizer Canada.

CM: none

CC: Receives grant funding from PHAC and CITF through internal research funding streams at PHAC

SOB: none

JK: Receives grant funding from PHAC through internal research funding streams at PHAC

Study Funding statement: Study funding from Research Manitoba, Public Health Agency of Canada funding for the Kim lab

Role of funding sources: The study sponsors had no role in study design, data collection, analysis, interpretation, writing, or in the decision to submit the manuscript.

Ethics statement: All subjects provided informed consent. The study was approved by the University of Manitoba Health Research Ethics Board (HS24647-H2021-005), Manitoba Shared

Running title: COVID-19 vaccination in IMIDs

Health (SH2021:009), and the Health Canada and Public Health Agency of Canada Research Ethics Board (REB 2021-018P).

1. Krammer F. SARS-CoV-2 vaccines in development. *Nature* 2020;586(7830):516-27. doi: 10.1038/s41586-020-2798-3 [published Online First: 2020/09/24]
2. Baden LR, El Sahly HM, Essink B, et al. Efficacy and Safety of the mRNA-1273 SARS-CoV-2 Vaccine. *The New England journal of medicine* 2020 doi: 10.1056/NEJMoa2035389 [published Online First: 2020/12/31]
3. Polack FP, Thomas SJ, Kitchin N, et al. Safety and Efficacy of the BNT162b2 mRNA Covid-19 Vaccine. *The New England journal of medicine* 2020;383(27):2603-15. doi: 10.1056/NEJMoa2034577 [published Online First: 2020/12/11]
4. Falsey AR, Sobieszczyk ME, Hirsch I, et al. Phase 3 Safety and Efficacy of AZD1222 (ChAdOx1 nCoV-19) Covid-19 Vaccine. *The New England journal of medicine* 2021;385(25):2348-60. doi: 10.1056/NEJMoa2105290 [published Online First: 2021/09/29]
5. El-Gabalawy H, Guenther LC, Bernstein CN. Epidemiology of immune-mediated inflammatory diseases: incidence, prevalence, natural history, and comorbidities. *The Journal of rheumatology Supplement* 2010;85:2-10. doi: 10.3899/jrheum.091461 [published Online First: 2011/02/02]
6. Maddur MS, Vani J, Lacroix-Desmazes S, et al. Autoimmunity as a predisposition for infectious diseases. *PLoS pathogens* 2010;6(11):e1001077. doi: 10.1371/journal.ppat.1001077 [published Online First: 2010/11/17]
7. Grainger R, Kim AHJ, Conway R, et al. COVID-19 in people with rheumatic diseases: risks, outcomes, treatment considerations. *Nature reviews Rheumatology* 2022;18(4):191-204. doi: 10.1038/s41584-022-00755-x [published Online First: 2022/02/27]
8. Conway R, Grimshaw AA, König MF, et al. SARS-CoV-2 Infection and COVID-19 Outcomes in Rheumatic Diseases: A Systematic Literature Review and Meta-Analysis. *Arthritis & rheumatology (Hoboken, NJ)* 2022;74(5):766-75. doi: 10.1002/art.42030 [published Online First: 2022/03/28]
9. Schiavetti I, Ponzano M, Signori A, et al. Severe outcomes of COVID-19 among patients with multiple sclerosis under anti-CD-20 therapies: A systematic review and meta-analysis. *Multiple sclerosis and related disorders* 2022;57:103358. doi: 10.1016/j.msard.2021.103358 [published Online First: 2021/11/05]
10. Tripathi K, Godoy Brewer G, Thu Nguyen M, et al. COVID-19 and Outcomes in Patients With Inflammatory Bowel Disease: Systematic Review and Meta-Analysis. *Inflammatory bowel diseases* 2022;28(8):1265-79. doi: 10.1093/ibd/izab236
11. Aboulatta L, Kowalec K, Delaney J, et al. Trends of COVID-19 incidence in Manitoba and public health measures: March 2020 to February 2022. *BMC Res Notes* 2022;15(1):162. doi: 10.1186/s13104-022-06049-5 [published Online First: 2022/05/10]
12. Borobia AM, Carcas AJ, Pérez-Olmeda M, et al. Immunogenicity and reactogenicity of BNT162b2 booster in ChAdOx1-S-primed participants (CombiVacS): a multicentre, open-label, randomised, controlled, phase 2 trial. *Lancet (London, England)* 2021;398(10295):121-30. doi: 10.1016/s0140-6736(21)01420-3 [published Online First: 2021/06/29]
13. Barros-Martins J, Hammerschmidt SI, Cossmann A, et al. Immune responses against SARS-CoV-2 variants after heterologous and homologous ChAdOx1 nCoV-19/BNT162b2 vaccination. *Nature medicine* 2021;27(9):1525-29. doi: 10.1038/s41591-021-01449-9 [published Online First: 2021/07/16]

Running title: COVID-19 vaccination in IMIDs

14. Schmidt T, Klemis V, Schub D, et al. Immunogenicity and reactogenicity of heterologous ChAdOx1 nCoV-19/mRNA vaccination. *Nature medicine* 2021;27(9):1530-35. doi: 10.1038/s41591-021-01464-w [published Online First: 2021/07/28]
15. Information ClfH. Guidance on the Use of Standards for Race-Based and Indigenous Identity Data Collection and Health Reporting in Canada. . Ottawa, ON, 2022.
16. Johnson TM, Michaud K, England BR. Measures of Rheumatoid Arthritis Disease Activity. *Arthritis care & research* 2020;72 Suppl 10:4-26. doi: 10.1002/acr.24336 [published Online First: 2020/10/23]
17. Arora S, Isenberg DA, Castrejon I. Measures of Adult Systemic Lupus Erythematosus: Disease Activity and Damage. *Arthritis care & research* 2020;72 Suppl 10:27-46. doi: 10.1002/acr.24221 [published Online First: 2020/10/23]
18. Witges K, Sexton K, Graff LA, et al. What Is a Flare? The Manitoba Living With IBD Study. *Inflammatory bowel diseases* 2021 doi: 10.1093/ibd/izab192 [published Online First: 2021/08/05]
19. Sexton KA, Walker JR, Targownik LE, et al. The Inflammatory Bowel Disease Symptom Inventory: A Patient-report Scale for Research and Clinical Application. *Inflammatory bowel diseases* 2019;25(8):1277-90. doi: 10.1093/ibd/izz038 [published Online First: 2019/03/29]
20. Kurtzke JF. Rating neurologic impairment in multiple sclerosis: an expanded disability status scale (EDSS). *Neurology* 1983;33(11):1444-52. doi: 10.1212/wnl.33.11.1444 [published Online First: 1983/11/01]
21. Harris PA TR, Thielke R, Payne J, Gonzalez N, Conde JD. Research electronic data capture (REDCap) – A metadata-driven methodology and workflow process for providing translational research informatics support *J Biomed Inform* 2009 2009;42(2):377-81.
22. Cholette F, Mesa C, Harris A, et al. Dried blood spot specimens for SARS-CoV-2 antibody testing: A multi-site, multi-assay comparison. *PloS one* 2021;16(12):e0261003. doi: 10.1371/journal.pone.0261003 [published Online First: 2021/12/08]
23. Botwin GJ, Li D, Figueiredo J, et al. Adverse Events After SARS-CoV-2 mRNA Vaccination Among Patients With Inflammatory Bowel Disease. *The American journal of gastroenterology* 2021;116(8):1746-51. doi: 10.14309/ajg.000000000001342 [published Online First: 2021/05/29]
24. Ciampi E, Uribe-San-Martin R, Soler B, et al. Safety and humoral response rate of inactivated and mRNA vaccines against SARS-CoV-2 in patients with Multiple Sclerosis. *Multiple sclerosis and related disorders* 2022;59:103690. doi: 10.1016/j.msard.2022.103690 [published Online First: 2022/02/20]
25. Jena A, Mishra S, Deepak P, et al. Response to SARS-CoV-2 vaccination in immune mediated inflammatory diseases: Systematic review and meta-analysis. *Autoimmunity reviews* 2022;21(1):102927. doi: 10.1016/j.autrev.2021.102927 [published Online First: 2021/09/03]
26. Tortorella C, Aiello A, Gasperini C, et al. Humoral- and T-Cell-Specific Immune Responses to SARS-CoV-2 mRNA Vaccination in Patients With MS Using Different Disease-Modifying Therapies. *Neurology* 2022;98(5):e541-e54. doi: 10.1212/wnl.0000000000013108 [published Online First: 2021/11/24]
27. Skaria TG, Sreepakash A, Umesh R, et al. Withholding methotrexate after vaccination with ChAdOx1 nCov19 in patients with rheumatoid or psoriatic arthritis in India (MIVAC I and II): results of two, parallel, assessor-masked, randomised controlled trials. *The Lancet Rheumatology* 2022;4(11):e755-e64. doi: 10.1016/S2665-9913(22)00228-4 [published Online First: 20220912]
28. Curtis JR, Johnson SR, Anthony DD, et al. American College of Rheumatology Guidance for COVID-19 Vaccination in Patients With Rheumatic and Musculoskeletal Diseases: Version 3. *Arthritis &*

Running title: COVID-19 vaccination in IMIDs

- 1  
2  
3 *rheumatology (Hoboken, NJ)* 2021;73(10):e60-e75. doi: 10.1002/art.41928 [published Online  
4 First: 2021/08/05]
- 5 29. Bajwa HM, Novak F, Nilsson AC, et al. Persistently reduced humoral and sustained cellular immune  
6 response from first to third SARS-CoV-2 mRNA vaccination in anti-CD20-treated multiple  
7 sclerosis patients. *Multiple sclerosis and related disorders* 2022;60:103729. doi:  
8 10.1016/j.msard.2022.103729 [published Online First: 2022/03/26]
- 9 30. Stefanski AL, Rincon-Arevalo H, Schrezenmeier E, et al. B cell numbers predict humoral and cellular  
10 response upon SARS-CoV-2 vaccination among patients treated with rituximab. *Arthritis &  
11 rheumatology (Hoboken, NJ)* 2021 doi: 10.1002/art.42060 [published Online First: 2021/12/29]
- 12 31. Jyssum I, Kared H, Tran TT, et al. Humoral and cellular immune responses to two and three doses of  
13 SARS-CoV-2 vaccines in rituximab-treated patients with rheumatoid arthritis: a prospective,  
14 cohort study. *The Lancet Rheumatology* 2022;4(3):e177-e87. doi: 10.1016/S2665-  
15 9913(21)00394-5 [published Online First: 20211223]
- 16 32. Apostolidis SA, Kakara M, Painter MM, et al. Cellular and humoral immune responses following  
17 SARS-CoV-2 mRNA vaccination in patients with multiple sclerosis on anti-CD20 therapy. *Nature  
18 medicine* 2021;27(11):1990-2001. doi: 10.1038/s41591-021-01507-2 [published Online First:  
19 2021/09/16]
- 20 33. Stuart ASV, Shaw RH, Liu X, et al. Immunogenicity, safety, and reactogenicity of heterologous COVID-  
21 19 primary vaccination incorporating mRNA, viral-vector, and protein-adjuvant vaccines in the  
22 UK (Com-COV2): a single-blind, randomised, phase 2, non-inferiority trial. *Lancet (London,  
23 England)* 2022;399(10319):36-49. doi: 10.1016/s0140-6736(21)02718-5 [published Online First:  
24 2021/12/10]
- 25 34. Follmann D, Janes HE, Buhule OD, et al. Antinucleocapsid Antibodies After SARS-CoV-2 Infection in  
26 the Blinded Phase of the Randomized, Placebo-Controlled mRNA-1273 COVID-19 Vaccine  
27 Efficacy Clinical Trial. *Annals of internal medicine* 2022;175(9):1258-65. doi: 10.7326/M22-1300  
28 [published Online First: 20220705]
- 29 35. Pincus T, Yazici Y, Bergman MJ. RAPID3, an index to assess and monitor patients with rheumatoid  
30 arthritis, without formal joint counts: similar results to DAS28 and CDAI in clinical trials and  
31 clinical care. *Rheumatic diseases clinics of North America* 2009;35(4):773-8, viii. doi:  
32 10.1016/j.rdc.2009.10.008 [published Online First: 2009/12/08]
- 33 36. Svenungsson E, Gunnarsson I, Illescas-Bäckelin V, et al. Quick Systemic Lupus Activity Questionnaire  
34 (Q-SLAQ): a simplified version of SLAQ for patient-reported disease activity. *Lupus Sci Med*  
35 2021;8(1) doi: 10.1136/lupus-2020-000471
- 36 37. Koch MW, Mostert JP, Wolinsky JS, et al. Comparison of the EDSS, Timed 25-Foot Walk, and the 9-  
37 Hole Peg Test as Clinical Trial Outcomes in Relapsing-Remitting Multiple Sclerosis. *Neurology*  
38 2021;97(16):e1560-e70. doi: 10.1212/wnl.0000000000012690 [published Online First:  
39 2021/08/27]
- 40 38. Feng S, Phillips DJ, White T, et al. Correlates of protection against symptomatic and asymptomatic  
41 SARS-CoV-2 infection. *Nature medicine* 2021;27(11):2032-40. doi: 10.1038/s41591-021-01540-1  
42 [published Online First: 2021/10/01]
- 43 39. Widdifield J, Kwong JC, Chen, S, Eder L, Benchimol EI, Kaplan GG, Hitchon CA, Aviña-Zubieta JA,  
44 Lacaille D, Chung H, Bernatsky B. Vaccine Effectiveness against SARS-CoV-2 infection and severe  
45 outcomes among individuals with Immune-Mediated Inflammatory Diseases tested between  
46 March 1 and November 22, 2021: A population-based analysis. *Lancet Rheumatology* 2022;in  
47 press
- 48  
49  
50  
51  
52  
53  
54  
55  
56  
57  
58  
59  
60

Running title: COVID-19 vaccination in IMIDs

1  
2  
3  
4  
5  
6  
7  
8  
9  
10  
11  
12  
13  
14  
15  
16  
17  
18  
19  
20  
21  
22  
23  
24  
25  
26  
27  
28  
29  
30  
31  
32  
33  
34  
35  
36  
37  
38  
39  
40  
41  
42  
43  
44  
45  
46  
47  
48  
49  
50  
51  
52  
53  
54  
55  
56  
57  
58  
59  
60

For peer review only

Running title: COVID-19 vaccination in IMIDs

### List of Tables and Figures

Table 1 Demographics, vaccines administered, self reported IMID flare, and COVID-19 history of participants

IA=inflammatory arthritis; SARDs = systemic autoimmune rheumatic disease; IBD = inflammatory bowel disease; MS= multiple sclerosis; IMID = immune mediated inflammatory disease; FT=full time; PT= part time; BMI=body mass index; JAKi= janus kinase inhibitor; TNF= tumor necrosis factor inhibitor; BNT= BNT162b2 vaccine V1= first vaccine; V2 = second vaccine, V3 = third vaccine; V4 = fourth vaccine; NA=not available, PCR= polymerase chain reaction; IQR = interquartile range

<sup>1</sup> IMID treatment based on most aggressive combination if on multiple agents. 1 RA subject on only prednisone monotherapy. Medication data missing for 2 SARDs subjects

<sup>2</sup> cardiovascular disease includes ischemic heart disease, congestive heart failure, valvular heart disease peripheral vascular disease stroke or transient ischemic attack or hypertension; respiratory disease includes asthma or chronic obstructive pulmonary disease, other endocrine includes thyroid disease, hypercholesterolemia

<sup>3</sup> Vaccine data available for V1 N=326 (77 IA, 84 SARDs, 72 MS 93 IBD); V2 N=324 (77IA, 83 SARDs, 72 MS 92 IBD); V3 N=281 (76 IA, 74 SARDs, 63 MS, 74 IBD) V4 N=128 (35 IA, 37 SARDs 39 IBD 17 MS).

<sup>4</sup> Flare assessed by the following questions: IA: "Are you having a flare? SARDs: "In the past 3 months have you had a disease flare (A flare is when your disease gets worse)? Yes moderate or severe flare; IBD: In the past 6 months my disease has been: Constantly active, giving me symptoms every day, or often active, giving me symptoms most days or sometimes active, giving me symptoms on some days (for instance 1-2 days/week); MS Do you feel there has been a change in your MS since your last visit? "My multiple sclerosis is much worse and in a flare"

Flare rate across IMIDs 1 month after any vaccine  $\chi^2$  72.9  $p < 0.001$ ; Flare rate post V1 across IMIDs  $\chi^2$  21.8  $p < 0.001$ . Flare rate post V2 across IMIDs  $\chi^2$  17.7  $p < 0.001$ ; Flare rate post V3 across IMIDs  $\chi^2$  29.4  $p < 0.001$ ; Flare rate post V4 across IMIDs  $\chi^2$  10.3  $p = 0.02$ . IMID Flare rate across vaccination visits  $\chi^2$  7.4  $p = 0.06$ .

<sup>5</sup> Self-reported over course of study; COVID-19 illness data missing for 2 SARDs and 1 IBD participant.

Running title: COVID-19 vaccination in IMIDs

Table 2 Seroconversion rates one month following each COVID-19 vaccine

IA=inflammatory arthritis; SARDs = systemic autoimmune rheumatic disease; IBD = inflammatory bowel disease; MS= multiple sclerosis; IMID = immune mediated inflammatory disease; V1 = first vaccine; V2 = second vaccine; V3= third vaccine; V4=fourth vaccine

<sup>1</sup> seroconversion V1 to v2 across IMIDs anti-S1 Chi<sup>2</sup> 82.2 p<0.0001; anti-RBD Chi<sup>2</sup> 55.1 p<0.0001

<sup>2</sup> change in anti-S1 seropositivity V1 to V2 IA Chi<sup>2</sup> 40.5 p<0.0001, SARDs Chi<sup>2</sup> 18.5 p<0.0001 IBD Chi<sup>2</sup>16.9 p<0.0001; MS Chi<sup>2</sup> 4.1 p=0.04

<sup>3</sup> change in anti-RBD seropositivity IA Chi<sup>2</sup> 31.6 p<0.0001, SARDS Chi<sup>2</sup> 18.8 p<0.0001, IBD Chi<sup>2</sup> 8.4 p<0.01, MS Chi<sup>2</sup> 5.1 p=0.02.

Table 3 Clinical variables associated with seroconversion.

RBD = Receptor binding domain; S1 = Spike protein; Ref = reference category; NA = not able to compute.

Figure 1 Titers of anti- spike and anti-receptor binding domain IgG levels following first, second third and fourth vaccination.

A. All IMIDs B. IA C. SARDs D. IBD E. MS

Data for seroconverters only. IgG levels natural log transformed. IMIDs=immune mediated inflammatory disease; IA = inflammatory arthritis; SARDs = systemic autoimmune rheumatic disease; IBD = inflammatory bowel disease; MS = multiple sclerosis; S1= spike; RBD= receptor binding domain; V1 = first vaccine; V2 = second vaccine; V3= third vaccine. Unadjusted p values \* p<0.0001, \*\* p≤0.001, \*\*\* p≤0.00, \*\*\*\* p<0.05

Figure 2 Titers of anti- spike and anti-receptor binding domain IgG levels 1 month following second vaccination by vaccine mixture. A log anti-RBD B log anti-Spike

Data for seroconverters only. IgG levels natural log transformed. S1= spike; RBD= receptor binding domain BNT= BNT162b2, Unadjusted p values \* p<0.01

Running title: COVID-19 vaccination in IMIDs

Figure 3 Disease activity before and after each vaccine

A Inflammatory arthritis B Systemic autoimmune rheumatic disease C Inflammatory bowel disease D Multiple Sclerosis

RAPID-3 Routine Assessment of Patient Index Data 3; SLAQ Systemic lupus activity questionnaire IBDSI-SF Inflammatory bowel disease symptom inventory – short form; EDSS Expanded disability status scale. V1 vaccine one; V2 vaccine two; V3 vaccine 3; V4 vaccine 4; mo = month(s).

## Supplementary Tables and Figures

Supplementary Table 1 Categorization of IMID treatments

Supplementary Table 2 Seroconversion rates based on vaccine mixture between first and second vaccinations

RBD= receptor binding domain; BNT= BNT162b2

Homologous (any) versus heterologous (any) vaccine combination anti-Spike  $\chi^2$  10.6 Fisher exact test  $p < 0.0001$ ; anti-RBD  $\chi^2$  8.0 Fishers exact test  $p = 0.004$ ;

Across all vaccine combinations anti-Spike  $\chi^2$  20.1 ( $p = 0.001$ ); anti-RBD  $\chi^2 = 13.7$  ( $p = 0.02$ )

Supplementary Table 3 Clinical features of IMIDs not seroconverting after 2 vaccines

IA= inflammatory arthritis; SARDs= Systemic autoimmune rheumatic disease; MS= multiple sclerosis; IBD= inflammatory bowel disease M= male; F= female

Supplementary Table 4: Clinical characteristics of anti-nucleocapsid seropositive participants

IMID = immune mediated inflammatory disease; IA= inflammatory arthritis; SARDs= Systemic autoimmune rheumatic disease; MS= multiple sclerosis; IBD= inflammatory bowel disease; NA not available (no prior visit with serology data). 1moV1 = 1 month post first vaccine, 1moV2 = 1 month post second vaccine; 3moV2 = 3 months post second vaccine; 1moV3 = 1 month post third vaccine; 1moV4 = 1 month post fourth vaccine

<sup>1</sup> anti-Receptor Binding Domain BAU/ml; median (interquartile range) for all samples 1moV2 1686.8 (2199.44); 3moV2 555.8 (809.3); 1moV3 4280.3(6380.6)

<sup>2</sup> anti-Spike BAU/ml; median values for all samples 1moV2 1835 (2448); 3moV2 629.1 (883.4); 1moV3 4280.3(6380.6)



Running title: COVID-19 vaccination in IMIDs

Supplementary Figure 1 Covid-19 vaccination timeline

HCW= health care workers; LTCR= long term care residents, GP= general population, IMID=immune mediated inflammatory disease; Bars indicate time when study participants (IMIDs) received vaccine. Light grey bars indicate time of first vaccine (V1); dark grey bars indicate time of second vaccine (V2).

Supplementary Figure 2 Recruitment and sample acquisition chart

Supplementary Figure 3 Correlation between assays performed using serum and dried blood spot samples.

A. log Anti-S1 B log anti-RBD, C. anti-S1 BAU/ml D anti RBD BAU/ml (Kendalls tau b correlation co-efficient anti-S1 BAU/ml= 0.92; anti-RBD BAU/ml=0.93)

Supplementary Figure 4 Titers of anti- spike and anti-receptor binding domain IgG levels 1 month following third vaccination by first and second vaccine mixture.

A log anti-RBD B log anti-Spike all comparisons p=NS

Supplementary Figure 5 Anti-Nucleocapsid antibody levels and correlations with Anti-Spike and Anti-Receptor Binding Domain antibodies

A. Anti-NC titer by Calendar month/year B. Anti-NC titer by Study visit C. Correlation of anti-NC anti RBD and anti-S1 titers in samples seropositive for anti-NC D. Correlation of anti-RBD and anti-S1 titers in all seropositive samples.

NC = nucleocapsid S = Spike; RBD = receptor binding domain; ln = natural log. V1 = vaccine 1; V2 = vaccine 2; V3 = vaccine 3; V4= vaccine 4. Values are natural log transformed BAU/ml.

Spearman correlation coefficient anti-NC with anti-S1 = 0.06 (p=NS); anti-NC with anti-RBD = 0.03 (p=NS); anti-S with anti-RBD 0.96 p<0.001.

Supplementary Figure 6 COVID-19 infection

Grey line = no COVID-19 symptoms reported; Dashed grey line = COVID-19 suspected but not tested; dashed black line = COVID-19 infection confirmed by community based testing (rapid detection or polymerase chain reaction test); solid black line = proportion anti-nucleocapsid seropositive V1 vaccine one; V2 vaccine two; V3 vaccine 3; V4 vaccine 4; mo = month(s).

1  
2  
3  
4  
5  
6  
7  
8  
9  
10  
11  
12  
13  
14  
15  
16  
17  
18  
19  
20  
21  
22  
23  
24  
25  
26  
27  
28  
29  
30  
31  
32  
33  
34  
35  
36  
37  
38  
39  
40  
41  
42  
43  
44  
45  
46  
47  
48  
49  
50  
51  
52  
53  
54  
55  
56  
57  
58  
59  
60

A



B



C



D



E



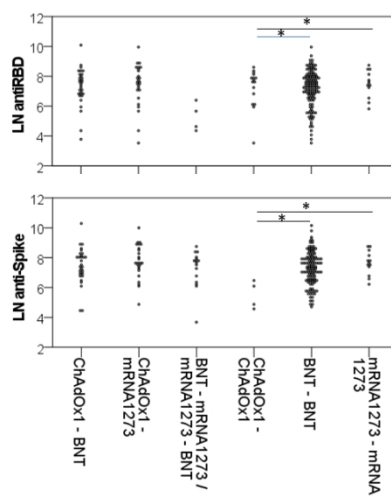

Figure 2 Titers of anti- spike and anti-receptor binding domain IgG levels 1 month following second vaccination by vaccine mixture. A log anti-RBD B log anti-Spike

Data for seroconverters only. IgG levels natural log transformed. S1= spike; RBD= receptor binding domain  
 BNT= BNT162b2, Unadjusted p values \* p<0.01

855x481mm (38 x 38 DPI)



Figure 3 Disease activity before and after each vaccine

A Inflammatory arthritis B Systemic autoimmune rheumatic disease C Inflammatory bowel disease D Multiple Sclerosis

RAPID-3 Routine Assessment of Patient Index Data 3; SLAQ Systemic lupus activity questionnaire IBDSI-SF Inflammatory bowel disease symptom inventory – short form; EDSS Expanded disability status scale. V1 vaccine one; V2 vaccine two; V3 vaccine 3; V4 vaccine 4; mo = month(s).

855x481mm (38 x 38 DPI)

Hitchon et al  
Supplementary Tables and Figures

Supplementary Table 1 Categorization of IMID treatments

| Treatment<br>Disease                                                     | Inflammatory Bowel<br>Disease                                                      | Multiple Sclerosis                                                                                                          | Rheumatoid Arthritis and<br>SARDs                                                                                                                                                                                                                   |
|--------------------------------------------------------------------------|------------------------------------------------------------------------------------|-----------------------------------------------------------------------------------------------------------------------------|-----------------------------------------------------------------------------------------------------------------------------------------------------------------------------------------------------------------------------------------------------|
| <b>Corticosteroids</b><br>(N=37)                                         | Methylprednisolone<br>Prednisolone)<br>Prednisone<br>Budesonide<br>Hydrocortisone  | Methylprednisolone<br>Prednisolone<br>Prednisone                                                                            | Methylprednisolone)<br>Prednisolone<br>Prednisone<br>Triamcinolone<br>Cortisone                                                                                                                                                                     |
| <b>Anti-inflammatory or<br/>Immunomodulatory<br/>therapies</b><br>(N=77) | 5-ASA<br>Sulfasalazine                                                             | Glatiramer acetate<br>interferon-beta 1a<br>interferon-beta 1b<br>dimethyl fumarate<br>Teriflunomide<br>Peg interferon-beta | Sulfasalazine<br>sodium aurothiomalate<br>auranofin<br>aurothioglucose<br>Penicillamine<br>Hydroxychloroquine (                                                                                                                                     |
| <b>Traditional<br/>immunosuppressive<br/>therapies</b><br>(N=78)         | Azathioprine<br>Methotrexate<br>6-mercaptopurine<br>Cyclosporine<br>Tacrolimus     | Azathioprine<br>Methotrexate)<br>Mitoxantrone<br>Cyclophosphamide                                                           | Azathioprine<br>methotrexate<br>Cyclophosphamide<br>Cyclosporine<br>Leflunomide<br>Mycophenolate<br>Tacrolimus                                                                                                                                      |
| <b>Novel therapies/<br/>Biologics<sup>1</sup></b><br>(N=98)              | Infliximab<br>adalimumab<br>Golimumab<br>Ustekinumab<br>Vedolizumab<br>Tofacitinib | Natalizumab<br>Fingolimod <sup>2</sup><br>Alemtuzumab<br>Cladribine<br>Ocrelizumab                                          | Infliximab)<br>Adalimumab<br>Etanercept<br>Anakinra<br>Rituximab <sup>3</sup><br>Abatacept <sup>3</sup><br>Tocilizumab<br>Tofacitinib<br>Golimumab<br>Certolizumab<br>Upadacitinib<br>Baricitinib<br><b>Belimumab</b><br>Sekukinumab<br>Ustekinumab |

<sup>1</sup> Anti-TNF N= 51, B cell depletion N=21, Past B cell depletion N=9, Other therapy N=27 (ustekinumab n=6, vedolizumab n=6, tofacitinib n=4, tocilizumab n=2, fingolimod n=2, alemtuzumab n=1, natalizumab n=1, upadacitinib n=1)

Hitchon et al  
Supplementary Tables and Figures

Supplementary Table 2 Seroconversion rates based on vaccine mixture between first and second vaccinations

RBD= receptor binding domain; BNT= BNT162b2

Homologous (any) versus heterologous (any) vaccine combination and seroconversion 1 month post V2 anti-Spike  $\chi^2$  7.8  $p < 0.01$ ; antiRBD  $\chi^2$  6.8  $p < 0.01$ ; 1 month post V3 anti-Spike  $\chi^2$  0.5  $p = NS$ ; anti RBD  $\chi^2$  0.2  $p = NS$

|                    | 1month post V2<br>Anti-Spike<br>seroconverted<br>n/N (%) | 1month post V2<br>Anti-RBD<br>seroconverted<br>n/N (%) | 1month post V3<br>Anti-Spike<br>seroconverted<br>n/N (%) | 1month post V3<br>Anti-RBD<br>seroconverted<br>n/N (%) |
|--------------------|----------------------------------------------------------|--------------------------------------------------------|----------------------------------------------------------|--------------------------------------------------------|
| Homologous         | 137/158 (86.7)                                           | 139/158 (88.0)                                         | 130/140 (92.9)                                           | 132/140 (94.3)                                         |
| ChAdOX1-ChAdOX1    | 4/6 (66.7)                                               | 4/6 (66.7)                                             | 5/6 (83.3)                                               | 5/6 (83.3)                                             |
| BNT-BNT            | 120/139 (84.3)                                           | 122/139 (87.8)                                         | 112/121 (92.6)                                           | 113/121 (93.4)                                         |
| mRNA 1273-mRNA1273 | 13/13 (100)                                              | 13/13 (100)                                            | 13/13 (100.0)                                            | 13/13 (100.0)                                          |
| Heterologous       | 69/70 (98.6)                                             | 69/70 (98.6)                                           | 64/65 (98.5)                                             | 64/65 (98.5)                                           |
| ChAdOX1-BNT        | 30/31 (96.8)                                             | 30/31 (96.8)                                           | 27/28 (96.4)                                             | 27/28 (96.4)                                           |
| ChAdOX1-mRNA1273   | 25/25 (100)                                              | 25/25 (100)                                            | 24/24 (100.0)                                            | 24/24 (100.0)                                          |
| BNT-mRNA1273       | 14/14 (100)                                              | 14/14 (100)                                            | 13/13 (100.0)                                            | 13/13 (100.0)                                          |

Hitchon et al

## Supplementary Tables and Figures

## Supplementary Table 3 Clinical features of IMIDs not seroconverting after 2 vaccinations

IMID = immune mediated inflammatory disease; IA= inflammatory arthritis; SARDs= Systemic autoimmune rheumatic disease; MS= multiple sclerosis; IBD= inflammatory bowel disease M=male; F=female

| IMID  | Sex | Age baseline | Medication                         | vaccine combination |
|-------|-----|--------------|------------------------------------|---------------------|
| IA    | M   | 82           | Prednisone                         | BNT-BNT             |
| IA    | F   | 77           | Methotrexate + rituximab           | BNT-BNT             |
| IA    | F   | 76           | tocilizumab                        | BNT-BNT             |
| IA    | F   | 70           | methotrexate + anti-TNF            | BNT-BNT             |
| IA    | F   | 61           | mycophenolate                      | BNT-BNT             |
| SARDs | F   | 66           | rituximab + prednisone             | BNT-BNT             |
| SARDs | F   | 60           | mycophenolate                      | ChAdOX1-ChAdOX1     |
| SARDs | F   | 31           | rituximab + prednisone             | BNT-BNT             |
| SARDs | F   | 72           | mycophenolate                      | BNT-BNT             |
| SARDs | F   | 71           | mycophenolate                      | BNT-BNT             |
| SARDs | F   | 69           | mycophenolate + IV Immune globulin | BNT-BNT             |
| SARDs | F   | 69           | azathioprine + past rituximab      | BNT-BNT             |
| MS    | F   | 56           | ocrelizumab                        | ChAdOX1-BNT         |
| MS    | M   | 57           | ocrelizumab                        | BNT-BNT             |
| MS    | F   | 74           | none                               | BNT-BNT             |
| MS    | F   | 36           | ocrelizumab                        | BNT-BNT             |
| MS    | F   | 48           | fingolimod                         | BNT-BNT             |
| MS    | F   | 81           | none                               | BNT-BNT             |
| MS    | F   | 34           | ocrelizumab                        | BNT-BNT             |
| IBD   | F   | 31           | anti-TNF + prednisone              | ChAdOX1-ChAdOX1     |

Hitchon et al  
Supplementary Tables and Figures

Supplementary table 4: Clinical characteristics of anti-nucleocapsid seropositive participants

| IMID  | Age (years) | First visit tested positive | Preceding visit with serology | Anti-RBD titer at preceding visit <sup>1</sup> | Anti-S1 titer at preceding visit <sup>2</sup> | First and second vaccine | Last vaccine prior to infection | IMID treatment |
|-------|-------------|-----------------------------|-------------------------------|------------------------------------------------|-----------------------------------------------|--------------------------|---------------------------------|----------------|
| IA    | 63          | 1moV4                       | 1moV3                         | 76752                                          | 11941                                         | v/mRNA                   | mRNA1273                        | JAKi           |
| IA    | 63          | 1moV3                       | 3moV1                         | NA                                             | NA                                            | mRNA/mRNA                | mRNA1273                        | HDQ;MTX        |
| IA    | 65          | 3moV4                       | 3moV2                         | 1547                                           | 1505                                          | mRNA/mRNA                | BNT                             | HDQ            |
| IA    | 69          | 1moV4                       | 1moV3                         | 1365                                           | 1526                                          | mRNA/mRNA                | mRNA1273                        | HDQ aTNF       |
| IA    | 53          | 1moV3                       | 3moV2                         | 923                                            | 178                                           | mRNA/mRNA                | BNT                             | HDQ, MTX       |
| IA    | 68          | 1moV4                       | 1moV3                         | 4680                                           | 3403                                          | mRNA/mRNA                | BNT                             | aTNF. Pred     |
| IA    | 49          | 1moV1                       | NA                            | NA                                             | NA                                            | mRNA/mRNA                | BNT                             | HDQ MTX        |
| IA    | 62          | 1moV1                       | NA                            | NA                                             | NA                                            | mRNA/mRNA                | BNT                             | HDQ            |
| SARDs | 61          | 1moV4                       | 1moV3                         | 2756                                           | 2825                                          | v/v                      | BNT                             | HDQ            |
| SARDs | 60          | 1moV3                       | 3moV2                         | 867                                            | 556                                           | mRNA/mRNA                | BNT                             | HDQ            |
| SARDs | 62          | 1moV4                       | 1moV3                         | 17969                                          | 12938                                         | mRNA/mRNA                | BNT                             | MTX            |
| SARDs | 44          | 1moV3                       | 3moV2                         | 172                                            | 254                                           | mRNA/mRNA                | BNT                             | MTX            |
| SARDs | 64          | 1moV4                       | 3moV2                         | 74                                             | 96                                            | v/mRNA                   | BNT                             | Ritux          |
| SARDs | 38          | 1moV4                       | 1moV3                         | 3734                                           | 4104                                          | v/mRNA                   | mRNA1273                        | AZA            |
| SARDs | 39          | 3moV2                       | NA                            | NA                                             | NA                                            | v/mRNA                   | mRNA1273                        | AZA            |
| SARDs | 30          | 1moV4                       | NA                            | NA                                             | NA                                            | mRNA/mRNA                | BNT                             | aTNF           |
| MS    | 53          | 1moV2                       | NA                            | NA                                             | NA                                            | v/mRNA                   | mRNA1273                        | GLA            |
| MS    | 75          | 1moV1                       | NA                            | NA                                             | NA                                            | mRNA/mRNA                | BNT                             | None           |
| MS    | 56          | 1moV3                       | 3moV3                         | 2304                                           | 2811                                          | v/mRNA                   | mRNA1273                        | INF            |
| IBD   | 50          | 1moV2                       | NA                            | NA                                             | NA                                            | mRNA/mRNA                | BNT                             | VED            |
| IBD   | 67          | 1moV4                       | 3moV2                         | 591                                            | 584                                           | mRNA/mRNA                | mRNA1273                        | VED            |
| IBD   | 30          | 1moV4                       | 1moV3                         | 1339                                           | 1464                                          | mRNA/mRNA                | BNT                             | UST            |
| IBD   | 20          | 1moV4                       | 1moV3                         | 6221                                           | 6375                                          | mRNA/mRNA                | BNT                             | aTNF           |
| IBD   | 64          | 1moV3                       | 3moV2                         | 497                                            | 536                                           | v/mRNA                   | mRNA1273                        | 5-ASA          |
| IBD   | 45          | 1moV3                       | 3moV2                         | Neg                                            | neg                                           | mRNA/mRNA                | BNT                             | aTNF           |

IMID = immune mediated inflammatory disease; IA= inflammatory arthritis; SARDs= Systemic autoimmune rheumatic disease; MS= multiple sclerosis; IBD= inflammatory bowel disease; NA not available (no prior visit with serology data). 1moV1 = 1 month post first vaccine, 1moV2 = 1 month post second vaccine; 3moV2 = 3 months post second vaccine; 1moV3 = 1 month post third vaccine; 1moV4 = 1 month post fourth vaccine

<sup>1</sup>anti-Receptor Binding Domain BAU/ml; median (interquartile range) for all samples 1moV2 1686.8 (2199.44); 3moV2 555.8 (809.3); 1moV3 4280.3(6380.6)

<sup>2</sup>anti-Spike BAU/ml; median values for all samples 1moV2 1835 (2448); 3moV2 629.1 (883.4); 1moV3 4280.3(6380.6)



Hitchon et al  
 Supplementary Tables and Figures

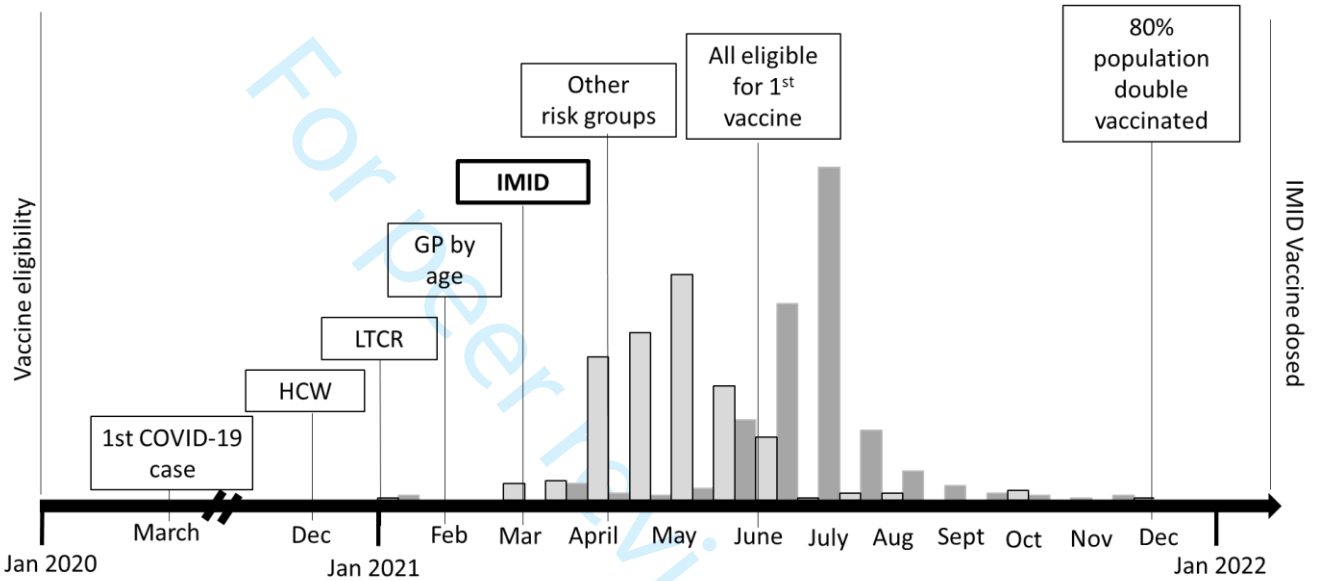

Supplementary Figure 1 Covid-19 vaccination timeline

HCW= health care workers; LTCR= long term care residents, GP= general population, IMID=immune mediated inflammatory disease; Bars indicate time when study participants (IMIDs) received vaccine. Light grey bars indicate time of first vaccine (V1); dark grey bars indicate time of second vaccine (V2).

Hitchon et al  
Supplementary Tables and Figures

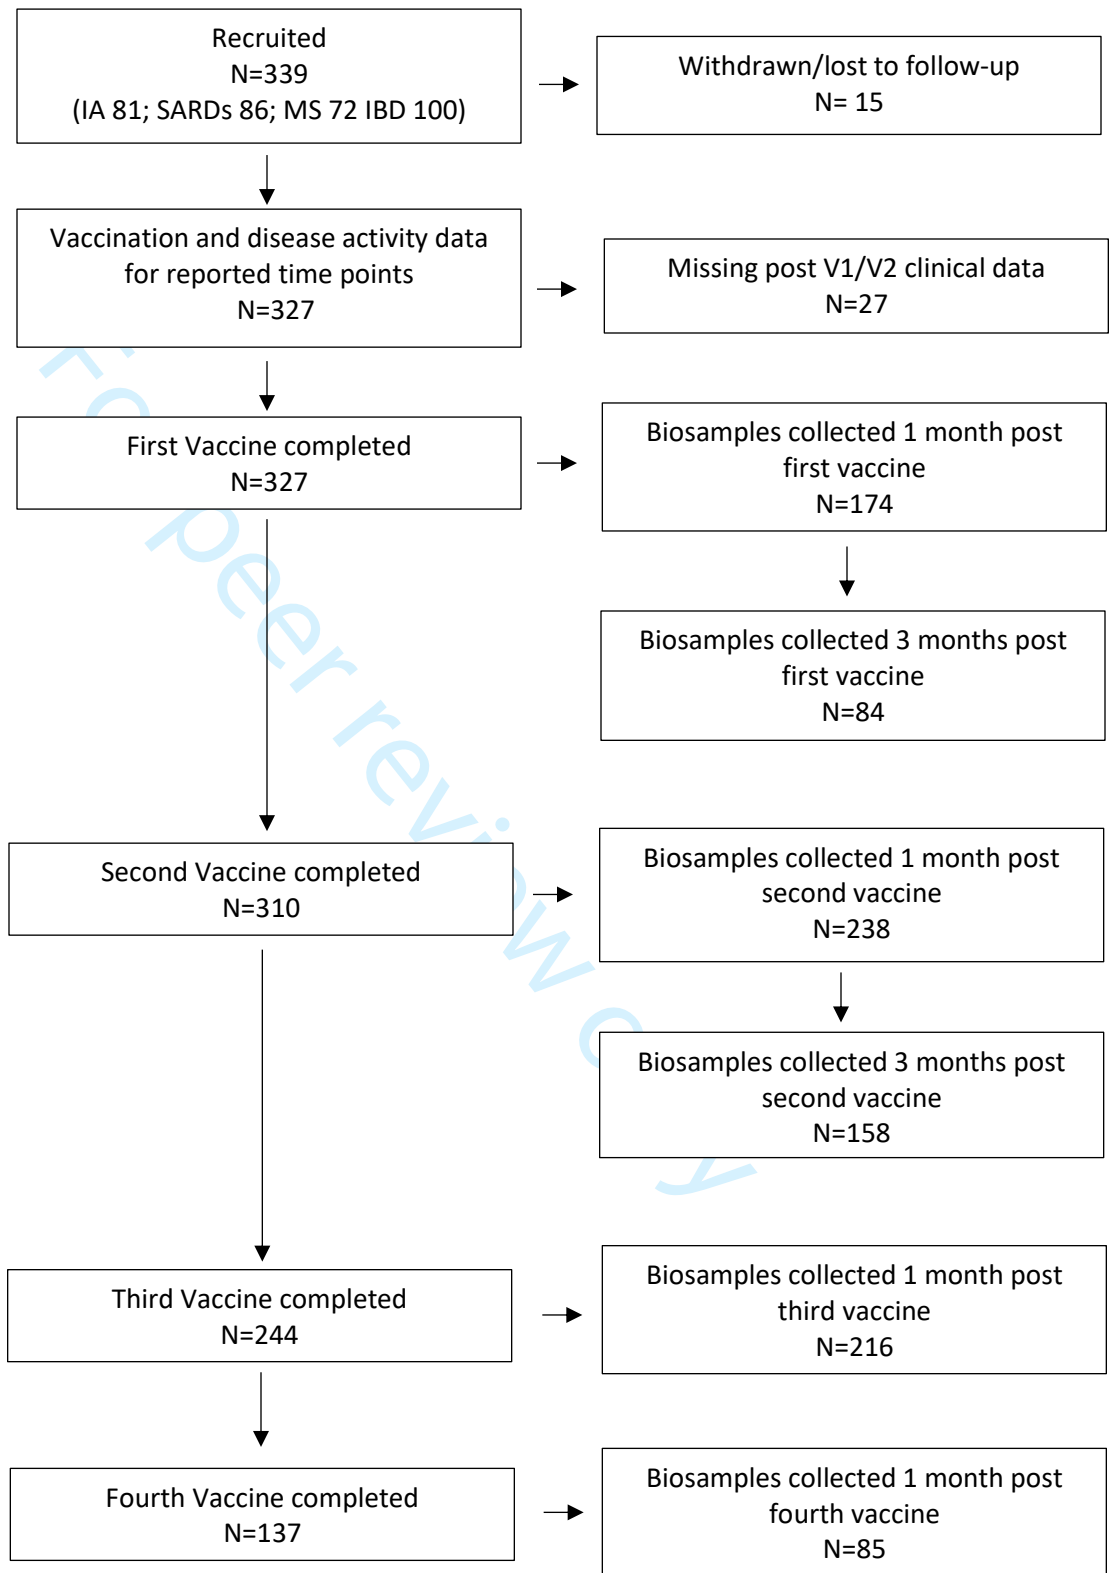

Supplementary Figure 2 Recruitment and sample acquisition chart

Hitchon et al  
 Supplementary Tables and Figures

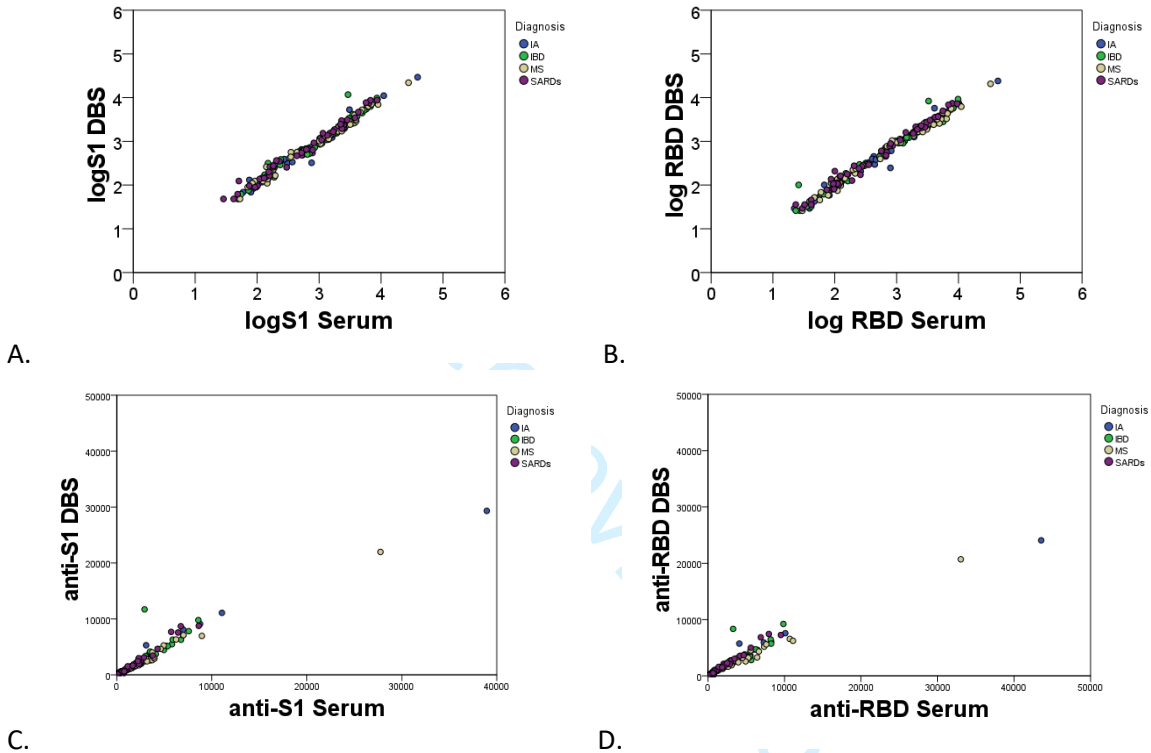

Supplementary Figure 3 Correlation between assays performed using serum and dried blood spot samples. A.  $\log$  Anti-S1 B  $\log$  anti-RBD, C. anti-S1 BAU/ml D anti RBD BAU/ml (Kendalls tau b correlation co-efficient anti-S1 BAU/ml= 0.92; anti-RBD BAU/ml=0.93)

Hitchon et al  
Supplementary Tables and Figures

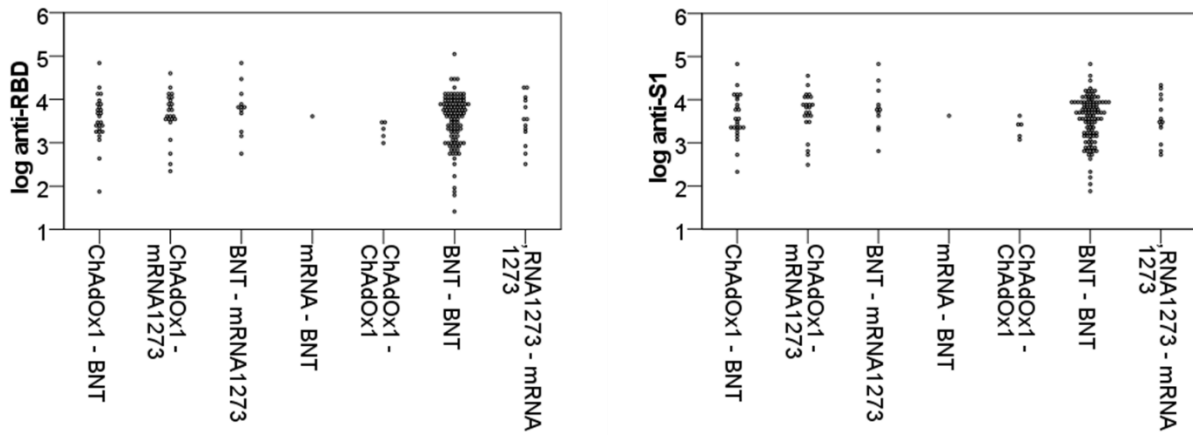

Supplementary Figure 4 Anti-SARS-CoV2 titers 1 month post third vaccine based on first and second vaccine mixture.

RBD= Receptor binding domain; S1= Spike 1. All comparisons p=NS

Hitchon et al  
Supplementary Tables and Figures

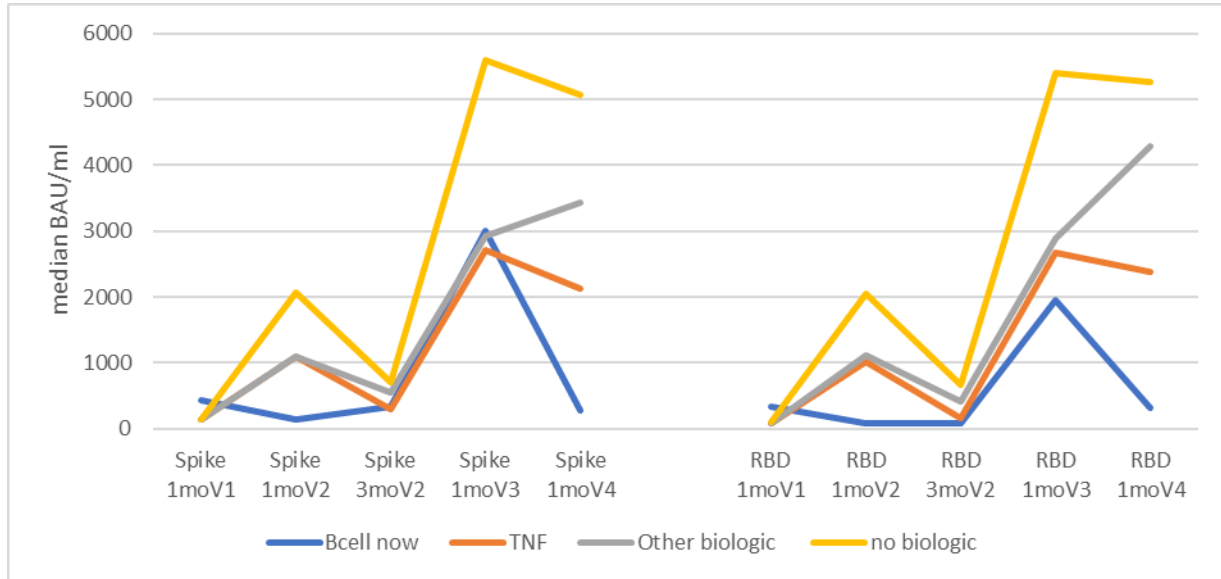

|         | B cell targeting now | anti-TNF | other biologic | no biologic | B cell targeting past |
|---------|----------------------|----------|----------------|-------------|-----------------------|
| N 1moV1 | 2                    | 14       | 8              | 77          | 2                     |
| N 1moV2 | 5                    | 37       | 16             | 152         | 4                     |
| N 3moV2 | 5                    | 34       | 20             | 154         | 5                     |
| N 1moV3 | 8                    | 34       | 19             | 140         | 5                     |
| N 1moV4 | 5                    | 18       | 11             | 46          | 5                     |

Supplementary Figure 5 Median titers of anti-Spike and anti-RBD for individuals on different biologic categories and number participants in each treatment category for each visit.

Hitchon et al  
Supplementary Tables and Figures



Supplementary Figure 6 Anti-Nucleocapsid antibody levels and correlations with Anti-Spike and Anti-Receptor Binding Domain antibodies

- A. Anti-NC titer by Calendar month/year B. Anti-NC titer by Study visit C. Correlation of anti-NC anti RBD and anti-S1 titers in samples seropositive for anti-NC D. Correlation of anti-RBD and anti-S1 titers in all seropositive samples.

NC = nucleocapsid S = Spike; RBD = receptor binding domain; ln = natural log. V1 = vaccine 1; V2 = vaccine 2; V3 = vaccine 3; V4 = vaccine 4. Values are natural log transformed BAU/ml.

Spearman correlation coefficient anti-NC with anti-S1 = 0.06 (p=NS); anti-NC with anti-RBD = 0.03 (p=NS); anti-S with anti-RBD 0.96 p<0.001. Figure 3 Disease activity before and after each vaccine

A Inflammatory arthritis B Systemic autoimmune rheumatic disease C Inflammatory bowel disease D Multiple Sclerosis

RAPID-3 Routine Assessment of Patient Index Data 3; SLAQ Systemic lupus activity questionnaire IBDSI-SF Inflammatory bowel disease symptom inventory – short form; EDSS Expanded disability status scale. V1 vaccine one; V2 vaccine two; V3 vaccine 3; V4 vaccine 4; mo = month(s).

Hitchon et al  
Supplementary Tables and Figures



Supplementary Figure 7 COVID-19 infection

Grey line = no COVID-19 symptoms reported; Dashed grey line = COVID-19 suspected but not tested; dashed black line = COVID-19 infection confirmed by community based testing (rapid detection or polymerase chain reaction test); solid black line = proportion anti-nucleocapsid seropositive.

V1 vaccine one; V2 vaccine two; V3 vaccine 3; V4 vaccine 4; mo = month(s); N = number

## STROBE Statement—checklist of items that should be included in reports of observational studies

|                              | Item No                                                                                                                                                                                                                                                                                                   | Recommendation                                                                                                                                                                                                                                                                                                                                                                                                                                                         | Page No |
|------------------------------|-----------------------------------------------------------------------------------------------------------------------------------------------------------------------------------------------------------------------------------------------------------------------------------------------------------|------------------------------------------------------------------------------------------------------------------------------------------------------------------------------------------------------------------------------------------------------------------------------------------------------------------------------------------------------------------------------------------------------------------------------------------------------------------------|---------|
| <b>Title and abstract</b>    | 1                                                                                                                                                                                                                                                                                                         | (a) Indicate the study's design with a commonly used term in the title or the abstract                                                                                                                                                                                                                                                                                                                                                                                 | 1       |
|                              |                                                                                                                                                                                                                                                                                                           | (b) Provide in the abstract an informative and balanced summary of what was done and what was found                                                                                                                                                                                                                                                                                                                                                                    | 4       |
| <b>Introduction</b>          |                                                                                                                                                                                                                                                                                                           |                                                                                                                                                                                                                                                                                                                                                                                                                                                                        |         |
| Background/rationale         | 2                                                                                                                                                                                                                                                                                                         | Explain the scientific background and rationale for the investigation being reported                                                                                                                                                                                                                                                                                                                                                                                   | 7       |
| Objectives                   | 3                                                                                                                                                                                                                                                                                                         | State specific objectives, including any prespecified hypotheses                                                                                                                                                                                                                                                                                                                                                                                                       | 7-8     |
| <b>Methods</b>               |                                                                                                                                                                                                                                                                                                           |                                                                                                                                                                                                                                                                                                                                                                                                                                                                        |         |
| Study design                 | 4                                                                                                                                                                                                                                                                                                         | Present key elements of study design early in the paper                                                                                                                                                                                                                                                                                                                                                                                                                | 7-8     |
| Setting                      | 5                                                                                                                                                                                                                                                                                                         | Describe the setting, locations, and relevant dates, including periods of recruitment, exposure, follow-up, and data collection                                                                                                                                                                                                                                                                                                                                        | 7-8     |
| Participants                 | 6                                                                                                                                                                                                                                                                                                         | (a) <i>Cohort study</i> —Give the eligibility criteria, and the sources and methods of selection of participants. Describe methods of follow-up<br><i>Case-control study</i> —Give the eligibility criteria, and the sources and methods of case ascertainment and control selection. Give the rationale for the choice of cases and controls<br><i>Cross-sectional study</i> —Give the eligibility criteria, and the sources and methods of selection of participants | 7-8     |
|                              |                                                                                                                                                                                                                                                                                                           | (b) <i>Cohort study</i> —For matched studies, give matching criteria and number of exposed and unexposed<br><i>Case-control study</i> —For matched studies, give matching criteria and the number of controls per case                                                                                                                                                                                                                                                 |         |
| Variables                    | 7                                                                                                                                                                                                                                                                                                         | Clearly define all outcomes, exposures, predictors, potential confounders, and effect modifiers. Give diagnostic criteria, if applicable                                                                                                                                                                                                                                                                                                                               | 8-9     |
| Data sources/<br>measurement | 8*                                                                                                                                                                                                                                                                                                        | For each variable of interest, give sources of data and details of methods of assessment (measurement). Describe comparability of assessment methods if there is more than one group                                                                                                                                                                                                                                                                                   | 7-9     |
| Bias                         | 9                                                                                                                                                                                                                                                                                                         | Describe any efforts to address potential sources of bias                                                                                                                                                                                                                                                                                                                                                                                                              | 7-9     |
| Study size                   | 10                                                                                                                                                                                                                                                                                                        | Explain how the study size was arrived at                                                                                                                                                                                                                                                                                                                                                                                                                              |         |
| Quantitative variables       | 11                                                                                                                                                                                                                                                                                                        | Explain how quantitative variables were handled in the analyses. If applicable, describe which groupings were chosen and why                                                                                                                                                                                                                                                                                                                                           | 7-9     |
| Statistical methods          | 12                                                                                                                                                                                                                                                                                                        | (a) Describe all statistical methods, including those used to control for confounding                                                                                                                                                                                                                                                                                                                                                                                  | 9       |
|                              |                                                                                                                                                                                                                                                                                                           | (b) Describe any methods used to examine subgroups and interactions                                                                                                                                                                                                                                                                                                                                                                                                    | 9       |
|                              | (c) Explain how missing data were addressed                                                                                                                                                                                                                                                               | 8                                                                                                                                                                                                                                                                                                                                                                                                                                                                      |         |
|                              | (d) <i>Cohort study</i> —If applicable, explain how loss to follow-up was addressed<br><i>Case-control study</i> —If applicable, explain how matching of cases and controls was addressed<br><i>Cross-sectional study</i> —If applicable, describe analytical methods taking account of sampling strategy | NA                                                                                                                                                                                                                                                                                                                                                                                                                                                                     |         |
|                              | (e) Describe any sensitivity analyses                                                                                                                                                                                                                                                                     |                                                                                                                                                                                                                                                                                                                                                                                                                                                                        |         |

Continued on next page



| <b>Results</b>           |     |                                                                                                                                                                                                              |                            |
|--------------------------|-----|--------------------------------------------------------------------------------------------------------------------------------------------------------------------------------------------------------------|----------------------------|
| Participants             | 13* | (a) Report numbers of individuals at each stage of study—eg numbers potentially eligible, examined for eligibility, confirmed eligible, included in the study, completing follow-up, and analysed            | 10 and S Fig 2             |
|                          |     | (b) Give reasons for non-participation at each stage                                                                                                                                                         | S Fig 2                    |
|                          |     | (c) Consider use of a flow diagram                                                                                                                                                                           | S Fig2                     |
| Descriptive data         | 14* | (a) Give characteristics of study participants (eg demographic, clinical, social) and information on exposures and potential confounders                                                                     | 10 Table1                  |
|                          |     | (b) Indicate number of participants with missing data for each variable of interest                                                                                                                          | Table 1                    |
|                          |     | (c) <i>Cohort study</i> —Summarise follow-up time (eg, average and total amount)                                                                                                                             |                            |
| Outcome data             | 15* | <i>Cohort study</i> —Report numbers of outcome events or summary measures over time                                                                                                                          | <i>Table 1</i>             |
|                          |     | <i>Case-control study</i> —Report numbers in each exposure category, or summary measures of exposure                                                                                                         |                            |
|                          |     | <i>Cross-sectional study</i> —Report numbers of outcome events or summary measures                                                                                                                           |                            |
| Main results             | 16  | (a) Give unadjusted estimates and, if applicable, confounder-adjusted estimates and their precision (eg, 95% confidence interval). Make clear which confounders were adjusted for and why they were included | 10-12 Figure 1,2,4 Table 3 |
|                          |     | (b) Report category boundaries when continuous variables were categorized                                                                                                                                    |                            |
|                          |     | (c) If relevant, consider translating estimates of relative risk into absolute risk for a meaningful time period                                                                                             |                            |
| Other analyses           | 17  | Report other analyses done—eg analyses of subgroups and interactions, and sensitivity analyses                                                                                                               | 10-12                      |
| <b>Discussion</b>        |     |                                                                                                                                                                                                              |                            |
| Key results              | 18  | Summarise key results with reference to study objectives                                                                                                                                                     | 12                         |
| Limitations              | 19  | Discuss limitations of the study, taking into account sources of potential bias or imprecision. Discuss both direction and magnitude of any potential bias                                                   | 13-14                      |
| Interpretation           | 20  | Give a cautious overall interpretation of results considering objectives, limitations, multiplicity of analyses, results from similar studies, and other relevant evidence                                   | 13-14                      |
| Generalisability         | 21  | Discuss the generalisability (external validity) of the study results                                                                                                                                        | 14                         |
| <b>Other information</b> |     |                                                                                                                                                                                                              |                            |
| Funding                  | 22  | Give the source of funding and the role of the funders for the present study and, if applicable, for the original study on which the present article is based                                                | 15                         |

\*Give information separately for cases and controls in case-control studies and, if applicable, for exposed and unexposed groups in cohort and cross-sectional studies.

**Note:** An Explanation and Elaboration article discusses each checklist item and gives methodological background and published examples of transparent reporting. The STROBE checklist is best used in conjunction with this article (freely available on the Web sites of PLoS Medicine at <http://www.plosmedicine.org/>, Annals of Internal Medicine at <http://www.annals.org/>, and Epidemiology at <http://www.epidem.com/>). Information on the STROBE Initiative is available at [www.strobe-statement.org](http://www.strobe-statement.org).

# BMJ Open

## Immunogenicity and safety of mixed COVID-19 vaccine regimens in patients with immune mediated inflammatory diseases: a single-centre prospective cohort study

|                                 |                                                                                                                                                                                                                                                                                                                                                                                                                           |
|---------------------------------|---------------------------------------------------------------------------------------------------------------------------------------------------------------------------------------------------------------------------------------------------------------------------------------------------------------------------------------------------------------------------------------------------------------------------|
| Journal:                        | <i>BMJ Open</i>                                                                                                                                                                                                                                                                                                                                                                                                           |
| Manuscript ID                   | bmjopen-2022-071397.R2                                                                                                                                                                                                                                                                                                                                                                                                    |
| Article Type:                   | Original research                                                                                                                                                                                                                                                                                                                                                                                                         |
| Date Submitted by the Author:   | 09-May-2023                                                                                                                                                                                                                                                                                                                                                                                                               |
| Complete List of Authors:       | Hitchon, Carol; University of Manitoba College of Medicine, Mesa, Christine; National Microbiology Laboratory<br>Bernstein, Charles; University of Manitoba College of Medicine<br>Marrie, Ruth Ann; University of Manitoba College of Medicine<br>Card, Catherine; National Microbiology Laboratory; University of Manitoba<br>O'Brien, Sheila F; Canadian Blood Services<br>Kim, John; National Microbiology Laboratory |
| <b>Primary Subject Heading</b>: | Infectious diseases                                                                                                                                                                                                                                                                                                                                                                                                       |
| Secondary Subject Heading:      | Gastroenterology and hepatology, Neurology, Rheumatology, Immunology (including allergy)                                                                                                                                                                                                                                                                                                                                  |
| Keywords:                       | COVID-19, RHEUMATOLOGY, GASTROENTEROLOGY, NEUROLOGY, IMMUNOLOGY                                                                                                                                                                                                                                                                                                                                                           |
|                                 |                                                                                                                                                                                                                                                                                                                                                                                                                           |

SCHOLARONE™  
Manuscripts

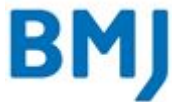

I, the Submitting Author has the right to grant and does grant on behalf of all authors of the Work (as defined in the below author licence), an exclusive licence and/or a non-exclusive licence for contributions from authors who are: i) UK Crown employees; ii) where BMJ has agreed a CC-BY licence shall apply, and/or iii) in accordance with the terms applicable for US Federal Government officers or employees acting as part of their official duties; on a worldwide, perpetual, irrevocable, royalty-free basis to BMJ Publishing Group Ltd ("BMJ") its licensees and where the relevant Journal is co-owned by BMJ to the co-owners of the Journal, to publish the Work in this journal and any other BMJ products and to exploit all rights, as set out in our [licence](#).

The Submitting Author accepts and understands that any supply made under these terms is made by BMJ to the Submitting Author unless you are acting as an employee on behalf of your employer or a postgraduate student of an affiliated institution which is paying any applicable article publishing charge ("APC") for Open Access articles. Where the Submitting Author wishes to make the Work available on an Open Access basis (and intends to pay the relevant APC), the terms of reuse of such Open Access shall be governed by a Creative Commons licence – details of these licences and which [Creative Commons](#) licence will apply to this Work are set out in our licence referred to above.

Other than as permitted in any relevant BMJ Author's Self Archiving Policies, I confirm this Work has not been accepted for publication elsewhere, is not being considered for publication elsewhere and does not duplicate material already published. I confirm all authors consent to publication of this Work and authorise the granting of this licence.

1  
2  
3 **Immunogenicity and safety of mixed COVID-19 vaccine regimens in patients with immune**  
4 **mediated inflammatory diseases: a single-centre prospective cohort study**  
5  
6  
7

8 CA Hitchon <sup>1</sup>, C Mesa <sup>2</sup>, CN Bernstein <sup>1</sup>, RA Marrie <sup>1,3</sup>, C Card <sup>2,4</sup>, S O'Brien <sup>5</sup>, J Kim <sup>2</sup>  
9

10 1 Department of Internal Medicine, Max Rady College of Medicine, Rady Faculty of Health  
11 Sciences, University of Manitoba, Winnipeg, Canada  
12

13 2 National Microbiology Laboratory Public Health Agency of Canada Winnipeg, Winnipeg,  
14 Canada  
15

16 3 Department of Community Health Sciences, Max Rady College of Medicine, Rady Faculty of  
17 Health Sciences, University of Manitoba, Winnipeg, Canada  
18

19 4 Department of Medical Microbiology and Infectious Diseases, Rady Faculty of Health  
20 Sciences, University of Manitoba, Winnipeg, Canada  
21

22 5 Canadian Blood Services, Ottawa, Canada  
23  
24  
25

26  
27 Authors:  
28

29 Carol A Hitchon, MD MSc, Department of Internal Medicine, Max Rady College of Medicine,  
30 Rady Faculty of Health Sciences, University of Manitoba, Winnipeg, Canada  
31

32 Christine Mesa, MSc, National Microbiology Laboratory Public Health Agency of Canada  
33 Winnipeg, Winnipeg, Canada  
34

35 Charles N Bernstein, MD, Department of Internal Medicine, Max Rady College of Medicine,  
36 Rady Faculty of Health Sciences, University of Manitoba, Winnipeg, Canada  
37

38 Ruth Ann Marrie, MD PhD, Department of Internal Medicine, and Department of Community  
39 Health Sciences, Max Rady College of Medicine, Rady Faculty of Health Sciences, University  
40 of Manitoba, Winnipeg, Canada  
41

42 Sheila O'Brien, PhD, Canadian Blood Services, Ottawa, Canada  
43

44 Catherine Card, PhD, National Microbiology Laboratory, Public Health Agency of Canada  
45 Winnipeg, CAN and Department of Medical Microbiology and Infectious Diseases, Rady  
46 Faculty of Health Sciences, University of Manitoba, Winnipeg, Canada  
47

48 John Kim, PhD, National Microbiology Laboratory Public Health Agency of Canada Winnipeg,  
49 Winnipeg, Canada  
50  
51  
52  
53  
54  
55  
56  
57  
58  
59  
60

1  
2  
3 **Correspondence to:**  
4

5 CA Hitchon  
6

7 RR149 800 Sherbrook Street, Winnipeg, Manitoba, Canada  
8

9 email: carol.hitchon@umanitoba.ca  
10  
11

12  
13 Word count 3300 words  
14  
15

16  
17 **Keywords:** COVID-19, rheumatology, gastroenterology, neurology, immunology, vaccination,  
18 immune systems diseases  
19  
20  
21  
22  
23  
24  
25  
26  
27  
28  
29  
30  
31  
32  
33  
34  
35  
36  
37  
38  
39  
40  
41  
42  
43  
44  
45  
46  
47  
48  
49  
50  
51  
52  
53  
54  
55  
56  
57  
58  
59  
60

For peer review only

## Abstract

**Objective:** Among persons with immune-mediated inflammatory diseases (IMIDs) who received SARS-CoV-2 vaccines, we compared post-vaccine antibody responses and IMID disease activity/states.

**Design:** Single centre prospective cohort study.

**Setting:** Specialty ambulatory clinics in central Canada.

**Participants:** People with inflammatory arthritis (n=78; 77% rheumatoid arthritis), systemic autoimmune rheumatic diseases (n=84; 57% lupus), inflammatory bowel disease (n=93; 43% Crohn's), and multiple sclerosis (n=72; 71% relapsing-remitting) (female 79.4%, white 84.7%, mean (SD) age 56.0(14.3 years) received COVID-19 vaccinations between 03/2021-09/2022.

**Primary outcome:** Post-vaccination anti-spike, -receptor binding domain (RBD) and -nucleocapsid (NC) IgG antibodies tested by multiplex immunoassays compared across vaccine regimens and to responses in 370 age-sex matched vaccinated controls.

**Secondary outcomes:** COVID-19 infection and self-reported IMID disease activity/state.

**Results:** Most 216/327 (66.1%) received homologous mRNA (BNT162b2 or mRNA1273) vaccines, 2.4% received homologous ChAdOx1, and 30.6% received heterologous vaccines (23.9% ChAdOx1/mRNA, 6.4% heterologous mRNA) for their first two vaccines (V1, V2). Seroconversion rates were: post-V1 anti-spike 91/175 (52.0%), anti-RBD 103/175 (58.9%); post-V2 anti-spike 214/234 (91.5%), anti-RBD 211/234 (90.2%), and were lower than controls (post-V2 anti-Spike 360/370 [98.1%]  $p<0.0001$ ). Antibody titers decreased 3 months post-V2 but increased 1 month post-V3 and 1 month post-V4 [BAU/ml median (IQR) 1 month post-V2, 3 months post-V2, 1 month post-V3, 1 month post V4 anti-S1 1835 (2448), 629.1 (883.4), 4757.5 (7033.1), 4356.0 (9393.4); anti-RBD 1686.8 (2199.44), 555.8 (809.3), 4280.3 (6380.6), 4792.2 (11673.78)]. If primed with a vector vaccine, a mRNA vaccine increased antibody titers to those comparable to homologous mRNA vaccines. Anti-RBD and anti-Spike titers were higher in anti-NC seropositive (N=31; 25 participants) versus seronegative samples [BAU/ml median (IQR) anti-RBD 11755.3 (20373.1) vs 1248.0 (53278.7); anti-Spike 11254.4 (15352.6) vs 1313.1 (3106.6); both  $p<0.001$ ]. IMID disease activity/state and rates of self-reported moderate or severe IMID flare were similar across vaccinations.

**Conclusion:** Heterologous COVID-19 vaccination improves seroconversion rates following a vector vaccine and does not lead to IMID disease flare. IMIDs benefit from at least three vaccines.

### Strengths and limitations of this study

- Longitudinal cohort study with systematic collection of data on COVID-19 infection, IMID disease activity and with paired biosamples for anti-SARSCoV2 IgG assays following each vaccine for up to four vaccines.
- Cross disease comparisons of four IMIDs from different medical specialties that are treated with immunocompromising medications.
- Validated measures of self-report IMID disease activity/state used to assess vaccine safety and risk of post-vaccine IMID disease flare.
- Relatively small sample size for each IMID and predominantly female population (as expected for these IMIDs) limits analysis of sex and gender effects.

## Introduction

COVID-19 vaccines have reduced rates of serious severe acute respiratory syndrome coronavirus (SARS-CoV-2) infection and mortality in the general population.<sup>1-4</sup> However, information on optimal vaccine strategies for immunocompromised individuals who are at increased risk of serious COVID-19 infection is limited.

Immune-mediated inflammatory diseases (IMIDs) such as autoimmune inflammatory arthritis (IA), systemic autoimmune rheumatic disease (SARD), inflammatory bowel disease (IBD), and multiple sclerosis (MS) affect 5% of the general population and share an autoimmune phenotype that affects multiple organ systems and treatment with immune therapies<sup>5</sup>. Due to immune-mediated disease and treatment, some people with IMIDs are at increased risk of vaccine preventable disease including serious COVID-19 infection<sup>6-10</sup>. While COVID-19 vaccines are effective in the general population, immune dysregulation from disease or treatment may impair vaccine responses in people with IMIDs. Due to evolving regional vaccination strategies in our region (<sup>11</sup> and Supplemental Figure 1), a high proportion of individuals with immunocompromised conditions received heterologous vaccine courses. Although available data on immunogenicity of these mixed vaccine courses in the general population are reassuring,<sup>12-14</sup> data are limited regarding the safety and immunogenicity of this strategy for immunocompromised patients as are data comparing these outcomes across diseases.

We established a cohort of patients diagnosed with any of IA, SARDs, IBD or MS to determine the safety (IMID flare) and humoral immunogenicity following COVID-19 vaccination and to assess the impact of mixing COVID-19 vaccine types. Herein, we report the clinical safety results and seroconversion results obtained after four vaccinations and compare seroconversion rates across initial vaccine combinations.

## Methods

### *Study design*



1  
2  
3 This single centre prospective cohort from Manitoba, Canada, was established in March 2021  
4 and enrolled people diagnosed with any of IA, SARDs, IBD, or MS. Data was collected until  
5 October 30<sup>th</sup> 2022. Vaccines were administered in accordance with provincial public health  
6 recommendations. Study participants were followed 1 and 3 months after each vaccine for up  
7 to four vaccines.  
8  
9  
10  
11

### 12 *Study objectives*

13  
14  
15 The primary study objective was to compare post-vaccination anti-spike, -receptor binding  
16 domain (RBD) and -nucleocapsid (NC) IgG antibody seroconversion and titres across vaccine  
17 regimens. Secondary study objectives were to determine the kinetics of seropositivity and titers  
18 across vaccine doses, to compare immunogenicity across IMIDs, to determine the effect of vaccination  
19 on COVID-19 infection (efficacy), and to determine post vaccine IMID disease activity/state and self-  
20 reported IMID flare (safety).  
21  
22  
23  
24  
25

### 26 *Recruitment*

27  
28  
29 We approached potential participants attending ambulatory clinics using multiple methods  
30 with an aim to enrol 400 individuals with a diagnosed IMID. Our sample size was limited by  
31 recruitment.  
32  
33  
34

### 35 *Clinical data*

36  
37  
38 Demographic data, including birth date, sex, self-reported ethnic group according to Canadian  
39 Institute for Health Information guidelines<sup>15</sup>, highest education level achieved, self-reported  
40 comorbidity and health behaviors such as smoking history were collected at baseline. Clinical  
41 data including IMID treatment, IMID-specific disease activity/state measures, participant  
42 reported interval COVID-19 infections with type of confirmatory test, and biosamples were  
43 collected at each visit. IMID treatment was subcategorized as anti-inflammatories and  
44 immunomodulators such as 5-ASA, sulfasalazine, hydroxychloroquine, glatiramer, and  
45 interferon therapies; traditional immunosuppressants such as methotrexate, leflunomide,  
46 azathioprine, and mycophenolate; biologic or advanced therapies such as anti-tumor necrosis  
47 factor agents, B cell depleting agents, vedolizumab, fingolimod, anti-cytokine therapies, other  
48  
49  
50  
51  
52  
53  
54  
55  
56  
57  
58  
59  
60

1  
2  
3 biologics and Janus kinase inhibitors; and corticosteroids (Supplementary Table 1). Self-  
4 reported IMID disease activity/status was assessed with disease relevant validated measures  
5 (IA: Routine Assessment of Inflammatory Disease version 3 RAPID-3, Rheumatoid Arthritis Flare  
6 Core domain indices; SARDs: Systemic Lupus Activity Questionnaire SLAQ; IBD: Inflammatory  
7 Bowel Symptoms Severity Index-Short Form (IBDSI-SF), Manitoba IBD flare question; MS: self  
8 report disease activity, Expanded Disability Status Scale [EDSS])<sup>16-20</sup>. These disease-related  
9 questionnaires were fully completed for IBD (248/255 97% visits), IA (208/215; 97% visits),  
10 SARDs (239/260; 92% visits), and MS (291/327; 89% visits). Data were not imputed. Individuals  
11 could attend a study visit in person or submit their data by mailed paper forms or direct entry  
12 into a REDCap electronic database hosted at the University of Manitoba<sup>21</sup>. Participants had the  
13 option to participate in the safety study component only.  
14  
15  
16  
17  
18  
19  
20  
21  
22  
23

### 24 *Biosamples*

25  
26 Participants not attending the clinic were provided kits to collect blood by finger poke on dried  
27 blood spot (DBS) cards for postal submission<sup>22</sup>. Participants attending the clinic had blood  
28 collected by venipuncture and DBS were prepared before processing blood for serum.  
29 Aliquoted serum and DBS cards were stored at -20C for batch testing.  
30  
31  
32  
33

34 Regional population control biosample data were obtained from 370 vaccinated Canadian  
35 Blood Services blood donors who were age and sex-matched to the clinical cohort. Data on  
36 vaccine type administered was not available.  
37  
38  
39  
40

### 41 *Serology*

42  
43 A bead-based multiplexed immunoassay was used to detect IgG anti-Spike (S1), Receptor  
44 Binding Domain (RBD) (reflecting response to vaccine), and Nucleocapsid (NC) antibodies  
45 (reflecting response to infection) (Bio-Rad Bioplex 2200 SARS-CoV-2 IgG assay). This assay was  
46 chosen based on an evaluation of several multiplex platforms using a large panel of well-  
47 pedigreed plasma-DBS specimens<sup>22</sup>. The quantitative measurement of the antibody response  
48 used the WHO International standard for anti-SARS-CoV-2 antibody detection. Cut-offs for  
49 seropositivity for DBS samples were established using ROC curve analysis. Cut-offs for plasma  
50 from the company were used. Sera from IA (n=19) and lupus (n=31) patients collected before  
51  
52  
53  
54  
55  
56  
57  
58  
59  
60

1  
2  
3 the pandemic were tested to evaluate the potential for false positive SARS-CoV-2 antibody tests  
4 in IMIDs with known autoantibodies. Concordance of antibody assays in paired DBS and serum  
5 samples was assessed using the Kendalls tau b test. The controls were tested using the Roche  
6 Elecsys® anti-SARS-CoV-2 spike protein semiquantitative immunoassay (Roche Diagnostics  
7 International Ltd, Rotkreuz, Switzerland) which measures total antibodies (including IgA, IgM  
8 and IgG) to the SARS-CoV2- spike protein (anti-S) and the Roche Elecsys® anti-SARS-CoV-2  
9 qualitative immunoassay (Roche Diagnostics LTD Rotkreuz, Switzerland) which measures total  
10 antibodies (including IgA, IgM and IgG) to SARS-CoV-2 recombinant protein, nucleocapsid  
11 antigen (anti-NC).  
12  
13  
14  
15  
16  
17  
18  
19

### 20 *Analysis*

21  
22 Demographic information of participants is reported using descriptive statistics including mean  
23 (standard deviation-sd), median (range or interquartile range-IQR), and counts (%). Non-  
24 parametric tests (Mann-Whitney U or Kruskal Wallis tests with Bonferroni adjustment [Badj] for  
25 multiple comparisons) were used to compare antibody levels across groups and visits. Wilcoxon  
26 signed rank tests were used to compare antibody levels across visits within individuals. Binary  
27 logistic regression was used to evaluate predictors of seroconversion one month following  
28 vaccine 2 (V2). Variables included sex, age greater than 65 years, IMID diagnosis, and treatment  
29 category (none versus biologics and advanced therapies versus immunosuppressants versus  
30 other agents), and vaccine mix (vector-mRNA versus mRNA-mRNA). Statistical analysis was  
31 conducted using IBM SPSS Statistics version 27 for Windows (IBM Corporation, Armonk, N.Y.,  
32 USA).  
33  
34  
35  
36  
37  
38  
39  
40  
41  
42  
43

### 44 *Ethics and consent*

45  
46 All subjects provided informed consent. The study was approved by the University of Manitoba  
47 Health Research Ethics Board (HS24647-H2021-005), Manitoba Shared Health (SH2021:009),  
48 and the Health Canada and Public Health Agency of Canada Research Ethics Board (REB 2021-  
49 018P).  
50  
51  
52

### 53 *Patient and public involvement*

1  
2  
3 Patients or the public were not involved in the study design or in the conduct or reporting of  
4 the research. Participants were informed of their serologic results.  
5  
6

## 7 **Results**

8  
9  
10 Between March 12th 2021 and July 30 2022, we recruited 339 participants (Supplementary Figure 2).  
11 Vaccination and disease activity data for the time points reported herein were available for 327  
12 participants (78 IA: 77% RA; 84 SARDS: 57% % lupus; 93 IBD: 43 % Crohn's and 72 MS: 71% Relapsing  
13 remitting) (Table 1). Most were female (79.4%) and white (84.7%) with a mean (sd) age of 56.0 (14.3)  
14 years. Nearly one-third (30.6%) of IMID participants were taking biologics or advanced therapies.  
15  
16  
17  
18  
19  
20  
21  
22  
23  
24  
25  
26  
27  
28  
29  
30  
31  
32  
33  
34  
35  
36  
37  
38  
39  
40  
41  
42  
43  
44  
45  
46  
47  
48  
49  
50  
51  
52  
53  
54  
55  
56  
57  
58  
59  
60

**Table 1.** Demographics, vaccines administered, self reported IMID flare, and COVID-19 history of participants

|                                         | <b>IA<br/>N=78</b> | <b>SARDs<br/>N=84</b> | <b>IBD<br/>N=93</b> | <b>MS<br/>N=72</b> | <b>All IMIDs<br/>N=327</b> |
|-----------------------------------------|--------------------|-----------------------|---------------------|--------------------|----------------------------|
| Age, years (mean SD)                    | 61.9(11.8)         | 55.7(13.4)            | 53.7(16.4)          | 53.1(13.5)         | 56.0 (14.3)                |
| Female n (%)                            | 66 (84.6)          | 75 (89.3)             | 59(63.4)            | 59 (81.9)          | 259 (79.4)                 |
| White n (%)                             | 66(84.6)           | 64 (76.2)             | 79(84.9)            | 68 (94.4)          | 277 (84.7)                 |
| Education                               |                    |                       |                     |                    |                            |
| Years of school (median/IQR)            | 15.0(4.5)          | 16.0(4.3)             | 16.0(4.0)           | 16.0(5.0)          | 16.0(4.0)                  |
| Comorbidity (n %) <sup>2</sup>          |                    |                       |                     |                    |                            |
| Cardiovascular                          | 35 (44.9)          | 31 (36.9)             | 26 (28.0)           | 22 (30.5)          | 115(35.1)                  |
| Pulmonary                               | 8 (10.2)           | 24 (28.6)             | 15 (16.1)           | 8 (11.1)           | 55(16.8)                   |
| Diabetes                                | 13 (19.7)          | 3 (3.7)               | 3 (3.4)             | 5 (6.9)            | 24(7.3)                    |
| Other endocrine                         | 25 (32.1)          | 24 (28.6)             | 20 (21.5)           | 20 (27.8)          | 90(27.4)                   |
| Renal disease                           | 2 (3.0)            | 9 (11.0)              | 4 (4.3)             | 0 (0.0)            | 15(4.6)                    |
| Cancer                                  | 15 (19.2)          | 10 (11.9)             | 12 (12.9)           | 56.9)              | 43 (13.10)                 |
| Mental Health                           | 17 (21.8)          | 27 (32.9)             | 27 (29.0)           | 22 (30.6)          | 94(28.7)                   |
| Total (median range)                    | 2.5(0-10)          | 3(0-10)               | 2(0-10)             | 2(0-6)             | 2(0-10)                    |
| BMI (mean SD)                           | 27 (6.6)           | 28.0 (7.8)            | 27.2 (6.1)          | 28.0 (6.2)         | 27.7 (6.7)                 |
| IMID Treatment level <sup>1</sup> n (%) |                    |                       |                     |                    |                            |
| Immunomodulators                        | 4(5.1)             | 25 (30.5)             | 21 (22.6)           | 28(38.9)           | 78 (23.9)                  |
| Immunosuppressants                      | 27 (34.6)          | 42 (51.2)             | 10 (10.8)           | 0 (0.0)            | 79 (24.2)                  |
| Biologics/JAKi                          | 37(47.4)           | 7 (8.5)               | 41 (44.1)           | 14 (19.4)          | 99 (30.3)                  |
| - anti-TNF (n)                          | 22                 | 2                     | 28                  | 0                  | 52                         |
| - anti-B cell (n)                       | 5                  | 6                     | 0                   | 10                 | 21                         |
| - other or JAKi (n)                     | 9                  | 0                     | 13                  | 4                  | 26                         |
| None                                    | 11 (14.1)          | 9 (10.7)              | 21(22.6)            | 30 (41.7)          | 71 (21.7)                  |
| Vaccine type V1 n (%) <sup>3</sup>      |                    |                       |                     |                    |                            |
| CHAdOx1                                 | 15 (19.5)          | 28 (33.3)             | 17 (18.3)           | 26 (36.1)          | 86 (26.4)                  |
| BNT                                     | 60 (77.9)          | 56 (66.7)             | 66 (71.0)           | 39 (54.2)          | 221 (67.8)                 |
| mRNA1273                                | 2 (2.6)            | 6 (7.1)               | 10 (10.8)           | 7 (9.7)            | 25 (7.7)                   |
| Vaccine type V2 n (%) <sup>3</sup>      |                    |                       |                     |                    |                            |
| CHAdOx1                                 | 2 (2.6)            | 3 (3.6)               | 3 (3.2)             | 1 (1.4)            | 9 (2.7)                    |
| BNT                                     | 65 (84.4)          | 58 (68.7)             | 60 (65.2)           | 54 (75.0)          | 236 (72.8)                 |
| mRNA1273                                | 16 (13.0)          | 23 (27.7)             | 29 (31.5)           | 17 (23.6)          | 79(24.4)                   |
| Vaccine type V3 n/N (%) <sup>3</sup>    |                    |                       |                     |                    |                            |
| CHAdOx1                                 | 0                  | 0                     | 1 (1.3)             | 1 (1.6)            | 2 (0.7)                    |
| BNT                                     | 54 (71)            | 58 (78.4)             | 49 (66.2)           | 39 (61.9)          | 200 (71.2)                 |
| mRNA1273                                | 16 (21.1)          | 16 (21.6)             | 24 (32.4)           | 23 (36.5)          | 79 (28.1)                  |
| Other                                   | 0                  | 0 (0)                 | 1 (1.4)             | 1 (1.6)            | 2 (0.7)                    |
| Vaccine type V4 n/N (%) <sup>3</sup>    |                    |                       |                     |                    |                            |
| CHAdOx1                                 | 0 / (0)            | 1 (2.7)               | 0 (0)               | 0 (0)              | 1 (0.8)                    |
| BNT                                     | 25 (69.4)          | 28 (75.7)             | 25 (64.1)           | 12 (70.6)          | 90 (69.8)                  |

|                                       |               |               |             |             |               |
|---------------------------------------|---------------|---------------|-------------|-------------|---------------|
| mRNA1273                              | 10 (27.8)     | 8 (21.6)      | 14 (35.9)   | 2 (11.8))   | 34 (26.4)     |
| Other                                 | -             | -             | -           | 3 (17.6)    | 3 (2.3)       |
| Vaccines for V1 and V2 n (%)          |               |               |             |             |               |
| CHAdOx1-- BNT                         | 9 (11.5)      | 10 (11.9)     | 4 (4.3)     | 17 (23.6)   | 40(12.2)      |
| CHAdOx1 - mRNA1287                    | 4 (5.1)       | 15(17.9)      | 11 (11.8)   | 8 (11.1)    | 38 (11.6)     |
| BNT – mRNA1273 or mRNA1273-BNT        | 4 (5.1)       | 5 (6.0)       | 10 (10.8)   | 2 (2.8)     | 21 (6.4)      |
| BNT-CHAdOx1                           | 0(0)          | 0(0)          | 1 (1.1)     | 0(0)        | 1 (0.3)       |
| CHAdOx1-CHAdOx1                       | 2 (2.6)       | 3 (3.6)       | 2 (2.2)     | 1 (1.4)     | 8 (2.4)       |
| BNT- BNT                              | 56(71.8)      | 46 (54.8)     | 55 (59.1)   | 37 (51.4)   | 194 (59.3)    |
| mRNA1273 -mRNA1273                    | 2 (2.6)       | 4 (4.8)       | 9 (9.7)     | 7 (9.7)     | 22 (6.7)      |
| Vaccine interval                      |               |               |             |             |               |
| Days between V1 and V2 median (range) | 66 (21-97)    | 62 (20-188)   | 57 (20-98)  | 59 (26-97)  | 60 (20-188)   |
| Self-report IMID flare <sup>4,5</sup> |               |               |             |             |               |
| 1 month post V1 n/N (%)               | 12/44 (27.3)  | 10/44 (22.7)  | 0/44 (0)    | 1/41 (2.4)  | 23/173 (13.3) |
| 1 month post V2 n/N (%)               | 9/56 (16.1)   | 9/58 (8.6)    | 0/67 (0)    | 2/69 (2.9)  | 20/250 (8.0)  |
| 1 month post V3 n/N (%)               | 11/57 (19.3)  | 19/63 (30.2)  | 2/62 (3.3)  | 1/61 (1.6)  | 33/243 (13.6) |
| 1 month post V4 n/N (%)               | 6/38 (15.8)   | 12/57 (21.1)  | 4/38 (8.3)  | 1/24 (4.2)  | 23/157 (14.6) |
| 1 month post any V n/N(%)             | 38/195 (19.5) | 50/202 (24.8) | 6/211 (2.8) | 5/129 (3.9) | 99/803 (12.2) |
| COVID-19 illness -ever <sup>5</sup>   |               |               |             |             |               |
| None                                  | 43 (55.1)     | 38 (46.3)     | 46 (50.0)   | 31 (43.1)   | 158 (48.8)    |
| Suspected but not tested              | 27 (34.6)     | 29 (35.4)     | 22 (23.9)   | 24 (33.3)   | 112(34.6)     |
| COVID-19 PCR +ve                      | 8 (10.3)      | 13 (15.9)     | 14 (15.2)   | 17 (23.6)   | 52 (16.0)     |
| COVID-19 +ve hospitalized             | 0 (0.0)       | 2 (2.4)       | 0 (0.0)     | 0 (0.0)     | 2 (0.6)       |

IA=inflammatory arthritis (Rheumatoid Arthritis N=60, Psoriatic arthritis N=8, other Spondyloarthropathy N=3, other IA N=7); SARDs = systemic autoimmune rheumatic disease (systemic lupus erythematosus N=48, myopathy N=5, vasculitis N=7 other or unknown SARDs N=24) ; IBD = inflammatory bowel disease (crohn's disease N=43); MS= multiple sclerosis (relapsing=remitting N=51, secondary progressive N=11, primary progressive N=4, unknown N=2) ; IMID = immune mediated inflammatory disease; FT=full time; PT= part time; BMI=body mass index; JAKi= janus kinase inhibitor; TNF= tumor necrosis factor inhibitor; BNT= BNT162b2 vaccine V1= first vaccine; V2 = second vaccine, V3 = third vaccine; V4 = fourth vaccine; NA=not available, PCR= polymerase chain reaction; IQR = interquartile range.

<sup>1</sup> IMID treatment based on most aggressive combination if on multiple agents. 1 RA subject on only prednisone monotherapy. Medication data missing for 2 SARDs subjects. Other therapy N=26 (ustekinumab n=6, vedolizumab n=7, abatacept n=1, tofacitinib n=4, tocilizumab n=3, fingolimod n=2, alemtuzumab n=1, natalizumab n=1, upadacitinib n=1)].

<sup>2</sup> cardiovascular disease includes ischemic heart disease, congestive heart failure, valvular heart disease peripheral vascular disease stroke or transient ischemic attack or hypertension; respiratory disease

1  
2  
3 includes asthma or chronic obstructive pulmonary disease, other endocrine includes thyroid disease,  
4 hypercholesterolemia.  
5

6 <sup>3</sup> Vaccine data available for V1 N=326 (77 IA, 84 SARDS, 72 MS 93 IBD); V2 N=324 (77IA, 83 SARDS, 72  
7 MS 92 IBD); V3 N=281 (76 IA, 74 SARDS, 63 MS, 74 IBD) V4 N=128 (35 IA, 37 SARDS 39 IBD 17 MS).  
8

9 <sup>4</sup> Flare assessed by the following questions: IA: "Are you having a flare? SARDS: "In the past 3 months  
10 have you had a disease flare (A flare is when your disease gets worse)? Yes moderate or severe flare;  
11 IBD: In the past 6 months my disease has been: Constantly active, giving me symptoms every day, or  
12 often active, giving me symptoms most days or sometimes active, giving me symptoms on some days  
13 (for instance 1-2 days/week); MS Do you feel there has been a change in your MS since your last visit?  
14 "My multiple sclerosis is much worse and in a flare".  
15

16  
17 Flare rate across IMIDs 1 month after any vaccine  $\chi^2$  72.9  $p < 0.001$ ; Flare rate post V1 across IMIDs  $\chi^2$   
18 21.8  $p < 0.001$ . Flare rate post V2 across IMIDs  $\chi^2$  17.7  $p < 0.001$ ; Flare rate post V3 across IMIDs  $\chi^2$   
19 29.4  $p < 0.001$ ; Flare rate post V4 across IMIDs  $\chi^2$  10.3  $p = 0.02$ . IMID Flare rate across vaccination visits  
20  $\chi^2$  7.4  $p = 0.06$ .  
21

22  
23 <sup>5</sup> Self-reported over course of study; COVID-19 illness data missing for 2 SARDS and 1 IBD participant.  
24  
25  
26  
27  
28  
29  
30  
31  
32  
33  
34  
35  
36  
37  
38  
39  
40  
41  
42  
43  
44  
45  
46  
47  
48  
49  
50  
51  
52  
53  
54  
55  
56  
57  
58  
59  
60

1  
2  
3 Samples of adequate quality were obtained following the first vaccine at 1 month (n=175) and 3  
4 months (n=44), following the second vaccine at 1 month (n=234) and 3 months (n=246),  
5  
6 following the third vaccine at 1 month (n=215) and following the fourth vaccine at 1 month  
7  
8 (n=85). For 31 participants, DBS samples were of inadequate quality and a serum sample from  
9  
10 the same day was substituted. In paired DBS and serum tests from 208 subjects, seroconversion  
11  
12 and titers were highly concordant (Kendall's tau b correlation coefficient anti-RBD  
13  
14 BAU/ml=0.93; anti-S1 BAU/ml= 0.92) (Supplementary Figure 3). Pre-pandemic sera were  
15  
16 seronegative for anti-SarsCo-V2 antibodies.

17  
18 Following the first vaccine, 60% of IMID participants seroconverted (Table 2). Following the  
19  
20 second vaccine, seroconversion rates increased to 91% (p=0.1 across IMIDs for both anti-S1 and  
21  
22 anti-RBD). The change in anti-S1 seropositivity between first and second vaccines was  
23  
24 significant (anti-S1 all IMIDs Chi<sup>2</sup> 82.2 p<0.0001; IA Chi<sup>2</sup> 40.5 p<0.0001; SARsDs Chi<sup>2</sup> 18.5  
25  
26 p<0.0001; IBD Chi<sup>2</sup>16.9 p<0.0001; MS Chi<sup>2</sup> 4.1 p=0.04 and anti-RBD all IMIDs Chi<sup>2</sup> 55.1  
27  
28 p<0.0001; IA Chi<sup>2</sup> 31.6 p<0.0001; SARsDs Chi<sup>2</sup> 18.8 p<0.0001; IBD Chi<sup>2</sup> 8.4 p<0.01; MS Chi<sup>2</sup> 5.1  
29  
30 p=0.02). Of the 20 participants who were seronegative after the second vaccine and had data  
31  
32 following the third vaccine, 8/15 (53.3) seroconverted after the third vaccine. Seroconversion  
33  
34 rates for both anti-S1 and anti-RBD after the third and fourth vaccines were greater than 95%.  
35  
36  
37  
38  
39  
40  
41  
42  
43  
44  
45  
46  
47  
48  
49  
50  
51  
52  
53  
54  
55  
56  
57  
58  
59  
60



**Table 2.** Seroconversion rates one month following each COVID-19 vaccine

| Seroconversion         | IA            | SARDs         | IBD            | MS            | All IMIDs       |
|------------------------|---------------|---------------|----------------|---------------|-----------------|
| Post V1                |               |               |                |               |                 |
| Anti- S1               | 14/47 (29.8%) | 21/47 (44.7%) | 33/48(68.8%)   | 23/33 (69.7%) | 91/175 (52.0%)  |
| Anti-RBD               | 18/47 (38.2%) | 22/47 (46.8%) | 40/48 (83.3%)  | 23/33 (69.7%) | 103/175 (58.9%) |
| Anti-NC                | 1/47 (2.1%)   | 0/48 (0%)     | 0/47 (0%)      | 1/33 (3%)     | 2/175 (1.1%)    |
| Post V2 <sup>1</sup> , |               |               |                |               |                 |
| Anti-S1 <sup>2</sup>   | 50/55 (90.9%) | 46/54 (85.1%) | 62/64 (96.9%)  | 53/61 (86.9%) | 214/234 (91.5%) |
| Anti-RBD <sup>3</sup>  | 50/55 (90.9%) | 47/54 (87.0%) | 63/64 (98.4%)  | 54/61 (88.5%) | 211/234 (90.2%) |
| Anti-NC                | 1/55 (1.8%)   | 0/57 (0%)     | 1/64 (1.6%)    | 1/61 (1.6%)   | 3/234 (1.3%)    |
| Post V3                |               |               |                |               |                 |
| Anti-S1                | 51/52 (98.1%) | 57/62 (91.9%) | 56/56 (100.0%) | 41/45 (91.1%) | 205/215 (95.3%) |
| Anti-RBD               | 51/52 (98.1%) | 56/62 (90.3%) | 56/56 (100.0%) | 41/45 (91.1%) | 204/215 (94.9%) |
| Anti-NC                | 2/52 (3.8%)   | 3/62 (4.8%)   | 2/56 (3.6%)    | 2/45 (4.4%)   | 9/215 (4.2%)    |
| Post V4                |               |               |                |               |                 |
| Anti-S1                | 31/32 (96.9%) | 21/23 (91.3%) | 27/27 (100%)   | 3/3 (100%)    | 82/85 (96.5%)   |
| Anti-RBD               | 31/32 (96.9%) | 21/23 (91.3%) | 27/27 (100%)   | 3/3 (100%)    | 82/85 (96.5%)   |
| Anti-NC                | 3/32 (9.4%)   | 4/23 (17.4%)  | 3/27 (11.1%)   | 0/3 (0.0%)    | 10/85 (11.8%)   |

IA=inflammatory arthritis; SARDs = systemic autoimmune rheumatic disease; IBD = inflammatory bowel disease; MS= multiple sclerosis; IMID = immune mediated inflammatory disease; V1 = first vaccine; V2 = second vaccine; V3= third vaccine; V4=fourth vaccine.

<sup>1</sup> seroconversion V1 to v2 across IMIDs anti-S1 Chi<sup>2</sup> 82.2 p<0.0001; anti-RBD Chi<sup>2</sup> 55.1 p<0.0001.

<sup>2</sup> change in anti-S1 seropositivity V1 to V2 IA Chi<sup>2</sup> 40.5 p<0.0001, SARDs Chi<sup>2</sup> 18.5 p<0.0001 IBD Chi<sup>2</sup>16.9 p<0.0001; MS Chi<sup>2</sup> 4.1 p=0.04.

<sup>3</sup> change in anti-RBD seropositivity V1 to V2 IA Chi<sup>2</sup> 31.6 p<0.0001, SARDS Chi<sup>2</sup> 18.8 p<0.0001, IBD Chi<sup>2</sup> 8.4 p<0.01, MS Chi<sup>2</sup> 5.1 p=0.02.

Post-V2 anti-S1 seroconversion rates for IMIDs were lower compared to those of age and sex-matched controls (anti-S1 seropositive controls 363/370 (98.1%) vs IMIDs X<sup>2</sup> 14.5 p<0.0001) but similar for anti-NC (anti-NC seropositive controls 13/370 (3.5%) vs IMIDs Chisq-2.9 p=0.1).

Matched population-based estimates were not available for subsequent vaccinations.

Anti-RBD and anti-S1 IgG titres of those who seroconverted increased between the 1 month post-V1 and 1 month post-V2 time points for combined IMIDs and for each IMID individually (Figure 1) (p values all p<0.0001). Anti-RBD and anti-S1 titers declined by 3 months post-second

1  
2  
3 vaccine (p values for combined IMIDs  $p < 0.0001$ ; SARDs  $p < 0.001$ ; IBD  $p < 0.001$ , IA  $p < 0.001$  and  
4 MS  $p < 0.001$ ) but increased 1 month post-third vaccine (p value all  $p < 0.0001$ ). Titers of anti-RBD  
5 and anti-Spike were similar between 1 month post-third vaccine and 1 month post-vaccine  
6 fourth vaccine. Within individuals, paired analysis of titers across visits yielded similar findings.  
7  
8

9  
10  
11 Over the study, 99 (30.6%) IMID participants received heterologous/mixed vaccines for their  
12 first two vaccines (Table 1). For those with one month post-V2 serology data, individuals  
13 receiving homologous vector vaccines had the lowest seroconversion rates and titers for both  
14 anti-RBD and anti-S1 responses. Individuals receiving either mRNA vaccine following a vector  
15 vaccine had comparable anti-RBD and anti-Spike titers as those receiving two mRNA vaccines  
16 (Figure 2). Anti-RBD and anti-S1 seropositivity and titers one month following the third vaccine  
17 were similar among individuals receiving different combinations of vaccines for their first two  
18 vaccines (Supplemental Table 2, Supplemental Figure 4).  
19  
20  
21  
22  
23  
24  
25  
26  
27  
28

29 Participants over age 65 years, diagnosed with MS, or taking biologics, were less likely to  
30 seroconvert by the second vaccine in multivariable models (Table 3). Results were similar if  
31 seroconversion was defined as seropositivity to anti-RBD and/or anti-Spike. Vaccine mix  
32 (vector-mRNA versus mRNA-mRNA) did not impact seroconversion when included in the  
33 regression models. Most of the 20 individuals who did not seroconvert after V2 were taking  
34 immunosuppressives (mycophenolate  $n=5$ ; methotrexate  $n=2$ , azathioprine  $n=1$ ) or biologics (B  
35 cell targeting currently or previously  $n=8$ , anti-TNF  $n=2$ , other  $n=2$ ) (Supplementary Table 3).  
36  
37  
38  
39  
40  
41  
42  
43  
44  
45  
46  
47  
48  
49  
50  
51  
52  
53  
54  
55  
56  
57  
58  
59  
60

**Table 3.** Clinical variables associated with seroconversion one month following second vaccine

|                       | <b>Post second vaccine<br/>OR (95% CI)</b> | <b>P value</b> |
|-----------------------|--------------------------------------------|----------------|
| RBD seroconversion    |                                            |                |
| Sex                   |                                            |                |
| Male                  | Ref                                        | 1.0            |
| Female                | 1.0 (0.21-4.71)                            |                |
| Age                   |                                            |                |
| >65 years             | Ref                                        | 0.002          |
| ≤ 65 years            | 7.4 (2.04-27.06)                           |                |
| IMID                  |                                            |                |
| IBD                   | Ref                                        | <0.001         |
| IA                    | 0.2 (0.02-2.65)                            |                |
| SARDs                 | 0.05 (0.003-0.79)                          |                |
| MS                    | 0.009 (0.001-0.13)                         |                |
| Immune therapy        |                                            |                |
| None                  | Ref                                        | 0.004          |
| Other immunomodulator | NA                                         |                |
| Immunosuppressant     | 0.03 (0.002-0.33)                          |                |
| Biologic              | 0.02 (0.002-0.16)                          |                |
| S1 seroconversion     |                                            |                |
| Sex                   |                                            |                |
| Male                  | Ref                                        | 0.85           |
| Female                | 1.1 (0.29-4.52)                            |                |
| Age                   |                                            |                |
| >65 years             | Ref                                        | 0.02           |
| ≤ 65 years            | 3.9 (1.29-11.62)                           |                |
| IMID                  |                                            |                |
| IBD                   | Ref                                        | <0.001         |
| RA                    | 0.5 (0.07-3.02)                            |                |
| SARDs                 | 0.1 (0.01-0.91)                            |                |
| MS                    | 0.03 (0.003-0.20)                          |                |
| Immune therapy        |                                            |                |
| None                  | Ref                                        | 0.01           |
| Other immunomodulator | NA                                         |                |
| Immunosuppressant     | 0.06 (0.006-0.51)                          |                |
| Biologic              | 0.04 (0.007-0.27)                          |                |

RBD = Receptor binding domain; S1 = Spike protein; Ref = reference category; NA = not able to compute. Biologics = Tumor necrosis factor antagonists, abatacept, tocilizumab, tofacitinib, upadacitinib, ustekinumab, apremilast, rituximab, anakinra, B cell targeted therapies (rituximab, belimumab, ocrelizumab). Immunosuppressants = methotrexate, leflunomide mycophenolate Immunomodulators = hydroxychloroquine, sulfasalazine.

1  
2  
3  
4  
5 We evaluated the impact of vaccine mix and treatment on waning of anti-SARSCo-V2 titers  
6 between 1 and 3 months following the second vaccination. In paired analysis the decline in  
7 titers between 1 month post V2 and 3 months post V2 for anti-RBD and anti-S1 differed across  
8 vaccine mixtures (anti-RBD  $p=0.026$ ; anti-S1  $p=0.02$ ) however this was mainly due to minimal  
9 titer changes for individuals receiving homologous vector vaccines who had lower titers overall.  
10 We observed greater titer change between those that received vector/mRNA versus  
11 mRNA/mRNA combinations for S1, but did not see differences in RBD titer change between  
12 those that received vector/mRNA versus mRNA/mRNA combinations. [median (IQR) anti-S1  
13 mixed 1591.6 (3002.7) vs homologous mRNA 1086.3 (1608.8)  $p=0.021$ ; anti-RBD mixed 1469.9  
14 (2086.5) vs homologous mRNA 1124.5 (1402.4)  $p=0.051$ ]. For individuals receiving homologous  
15 mRNA (BNT/BNT vs mRNA1273/mRNA1273) there was no difference in waning for anti-RBD or  
16 anti-S1. [RBD titer change anti-RBD: BNT/BNT 1080.6 (2405) vs mRNA1273/mRNA1273 1434.9  
17 (2465.1)  $p=0.58$ ; anti-S1 BNT/BNT 1051.9 (1674.1) vs mRNA1273/mRNA1273 1567.5 (2481.9)  
18  $p=0.39$ ]. There was no difference in waning for individuals receiving homologous mRNA vs  
19 mixed vector/mRNA of the same type for anti-RBD or anti-S1. There was no difference in titer  
20 change across different biologic categories (anti-TNF versus B cell depletion versus other biologic;  
21 anti-RBD  $p=0.30$ ; anti-S1  $p=0.14$ ) (Supplemental Figure 5).

22  
23  
24  
25  
26  
27  
28  
29  
30  
31  
32  
33  
34  
35  
36  
37  
38 Twenty-five participants were seropositive for anti-NC antibodies on at least one visit (8 IA, 8  
39 SARDs, 3 MS, 6 IBD) and for 4 of these individuals, seropositivity persisted with declining titers  
40 across consecutive visits spanning 3 to 6 months. All but one MS participant were also anti-RBD  
41 and anti-S1 seropositive. Anti-RBD and anti-S1 titers were higher in anti-NC positive compared  
42 to anti-NC negative samples [median (range; IQR) anti-RBD 11755.3 (20373.1) vs 1248.0 (27-  
43 78936.2; 53278.7); anti-Spike 11254.4 (77.3-68157.0; 15352.6) vs 1313.1 (37.4-87401.3;  
44 3106.6)] (Supplemental Figure 6). Of the 25 seropositive individuals, 9 were asymptomatic, 10  
45 were taking biologics (5 anti-TNFs, 3 current or past B cell depletion, 4 other biologics/advanced  
46 therapies), 7 immunosuppressives (5 methotrexate, 2 azathioprine), 7 immunomodulating  
47 agents alone, and 1 MS participant was on no IMID (Supplemental Table 4). Although the rates  
48  
49  
50  
51  
52  
53  
54  
55  
56  
57  
58  
59  
60

1  
2  
3 of anti-NC positivity increased over the course of the study, anti-NC titers did not vary by  
4 vaccine status (heterologous or homologous) nor by date tested (Table 2, Supplemental Figure  
5 7).  
6  
7  
8

9 Most participants reported no COVID-19 infection symptoms during the study, including 9  
10 individuals who tested seropositive for anti-NC antibodies, whereas 113 (35.7%) of participants  
11 reported mild symptoms consistent with COVID-19 infection but did not have community-based  
12 confirmatory testing by either polymerase chain testing before Dec 2021 or self-administered  
13 testing after Dec 2021. All COVID-19 infections with positive community-based testing were  
14 also anti-NC positive. Only two confirmed COVID-19 infections required hospitalization. Both  
15 had received 3 vaccines and had moderate levels of anti-NC (69.4 and 22.8 BAU/ml). (Table 1)  
16  
17  
18  
19  
20  
21  
22

23 Self-reported disease activity/status scores were similar across visits for each IMID (Figure 3).  
24 Rates of moderate or severe self-reported IMID flares were similar across vaccines. MS and IBD  
25 participants had lower rates of self-reported flare compared to IA and SARDs [n/N (%) with self-  
26 reported flare after any vaccine MS 5/129 (3.9), IA 38/195 (19.5), SARDs 50/202 (24.8); IBD  
27 6/211 (2.8) (Chi<sup>2</sup> 72.9 p<0.001] IA and SARDs tended to have greater rates of self-reported flare  
28  
29  
30  
31  
32 (Table 1).  
33  
34  
35  
36

## 37 Discussion

38  
39 This single center cohort study evaluated the safety and immunogenicity of SARS-COV-2  
40 vaccines in IMIDs and confirmed relative safety with no increase in IMID disease activity despite  
41 self-reported disease flare rates of 12% following four vaccinations. Fewer than two-thirds  
42 seroconverted after the first vaccine. Seroconversion rates differed by vaccine type with higher  
43 titres of anti-RBD and anti-Spike responses generated by mRNA vaccines compared to the  
44 available vector vaccine. Individuals who received an initial vector vaccine followed by a mRNA  
45 vaccine had vaccine induced titers that were comparable to those following a homologous  
46 mRNA vaccine course and were higher than those who received homologous vector vaccines.  
47  
48  
49  
50  
51  
52  
53  
54  
55  
56  
57  
58  
59  
60

1  
2  
3 the third and fourth vaccines. Most individuals who did not produce adequate humoral  
4 responses to the vaccine were taking immunosuppressants or biologics.  
5  
6

7  
8 Our findings are consistent with emerging clinical trial and cohort data from the general  
9 population and other immunocompromised groups. Prior studies of rheumatic disease flare  
10 post-COVID-19 vaccination have produced mixed results however, most found no major  
11 concerns<sup>7</sup>. Data for IBD and MS are also reassuring<sup>23 24</sup>. Several studies have found lower  
12 seroconversion rates and anti-SARS-CoV-2 titers in IMIDs compared to the general population<sup>25</sup>  
13 <sup>26</sup>. While older age plays a role, the primary reason for reduced responses appears due to  
14 medication use with the greatest impact from biologics, especially B-cell depleting therapies,  
15 fingolimod, anti-tumor necrosis factor agents, and Janus kinase inhibitors, and with DMARDs  
16 such as mycophenolate and methotrexate. Hydroxychloroquine does not impair vaccine  
17 responses. Proposed strategies to optimize responses for patients on these medications include  
18 holding medication around the time of vaccination and delaying vaccination following infusion  
19 of B-cell targeted therapies<sup>27 28</sup>. For B cell therapies, humoral immune responses remain  
20 suboptimal even after third doses especially for individuals with low pre-vaccination cell  
21 counts<sup>29-31</sup>. Reassuringly, T cell responses are induced although possibly impaired<sup>26 31 32</sup>.  
22  
23  
24  
25  
26  
27  
28  
29  
30  
31  
32  
33

34 Heterologous vaccine administration increased as vaccine availability and data on safety and  
35 immunogenicity evolved, thereby allowing evaluation of the role of homologous versus  
36 heterologous vaccine administration for people with IMIDs. In the general population, clinical  
37 trials and cohort studies of mixing vaccine types that compared homologous vector,  
38 homologous mRNA and heterologous vector/mRNA vaccine courses observed greater immune  
39 responses (humoral and cellular) with mRNA vaccines than vector vaccines and that in  
40 individuals receiving a vector vaccine first, a mRNA vaccine improved vaccine responses to  
41 levels comparable to those of the homologous mRNA vaccines<sup>12-14 33</sup>. Our observations in IMIDs  
42 confirm that second, and at least third vaccination courses are needed to generate acceptable  
43 humoral immunogenicity, that mRNA vaccines can overcome limited responses to vector  
44 vaccines, and that the type of mRNA administered has minimal impact on waning antibody  
45 titers following the second vaccination.  
46  
47  
48  
49  
50  
51  
52  
53  
54  
55  
56  
57  
58  
59  
60

1  
2  
3 The clinical findings of this report reflect data collected during intermittent public health  
4 mandated societal restrictions, before and during the early period when the Omicron variant  
5 was circulating in our region, and before bivalent vaccines were available<sup>11</sup>. Over one-third  
6 reported mild symptoms or were suspected to have had COVID-19 illness but less than 10% had  
7 confirmed COVID-19 infection. Despite complete vaccination, infection and concerning  
8 symptoms increased as public health restrictions were relaxed, the prevalence of SARS-CoV-2  
9 virus increased, and new variants of concern emerged. This emphasizes the need for ongoing  
10 COVID-19 surveillance to inform personal health practices given the real concerns expressed by  
11 many people with IMIDs, even those who are fully vaccinated. Recent studies have described  
12 reduced sensitivity of the anti-NC assay following vaccination that is only partially explained by  
13 viral load.<sup>34</sup> In this study, all participants with COVID-19 infection confirmed with community  
14 based testing were also anti-NC positive and while the number of anti-NC +ve participants  
15 increased over the study, we did not see any difference in anti-NC IgG levels with number of  
16 vaccines or by calendar month.  
17  
18

19 We acknowledge limitations of this work. Our sample size was relatively small for each IMID;  
20 however, we have collected extensive patient-reported data combined with biologic samples  
21 from individuals representing four common IMID groups, allowing cross-disease and cross-  
22 specialty comparisons which are not widely reported. We assessed IMID disease activity using  
23 validated patient self-reported disease specific indices and flare questions although these  
24 questionnaires can be subject to recall bias. Ideally patient reported IMID activity would be  
25 supplemented with clinician assessed measures however both patient preferences and COVID-  
26 19 pandemic travel restrictions impacted the feasibility of in person clinical assessments for all  
27 participants. Self reported of disease activity/state measures correlate with clinical assessment  
28 measures<sup>19 35-37</sup>. As expected for these IMIDs, our population was predominantly female thus  
29 we lack power to detect sex-based differences in our outcomes and there is uncertainty as to  
30 how they would reflect a male predominant cohort. We focused on humoral vaccine induced  
31 immunogenicity using antibody seropositivity and titres as surrogates for vaccine induced  
32 protection. Antibody binding titers have been shown to correlate with neutralizing and cellular  
33 responses which in turn correlate with vaccine efficacy, although the titers needed to achieve  
34  
35  
36  
37  
38  
39  
40  
41  
42  
43  
44  
45  
46  
47  
48  
49  
50  
51  
52  
53  
54  
55  
56  
57

1  
2  
3 good vaccine efficacy may differ for anti-Spike and anti-RBD<sup>38</sup>. Further work is needed to  
4 evaluate the neutralization capacity of vaccine induced antibodies to SARS-COV-2 and emerging  
5 variants of concern including Omicron. We did not evaluate cellular immune responses yet  
6 these are critical for long term anti-viral protection especially for individuals without robust  
7 antibody responses. We were not able to confirm prior reports of the impact of different  
8 biologic categories on antibody titers however our study was not powered for this question.  
9 Additional studies are needed to evaluate if there are important differences across mRNA  
10 vaccines and vaccine intervals for optimal protection against variants of concern to inform  
11 recommendations for additional vaccinations in IMIDs. Importantly, it is still unclear what level  
12 of humoral or cellular immunogenicity is optimal to protect IMIDs against serious COVID-19  
13 infection although population-based vaccine efficacy data are emerging for some  
14 immunocompromised groups<sup>39</sup>.

15  
16 We conclude that most individuals with IMID can safely receive COVID-19 vaccines without risk  
17 of disease flare. At least two doses that include a mRNA vaccine, either homologous or mixed  
18 vaccine types are needed to generate humoral immunity comparable to the general population.  
19 The observed decline in humoral responses support the use of third and subsequent vaccine  
20 doses for IMIDs. These data can be used to direct vaccine policies in countries where vaccine  
21 rates have been lagging or where supply has been limited.

22  
23 \*\*\* \*\*

24  
25  
26  
27  
28  
29  
30  
31  
32  
33  
34  
35  
36  
37  
38  
39  
40  
41 **Disclaimer:** The results and conclusions are those of the authors and no official endorsement by  
42 University of Manitoba, Manitoba Shared Health, the Public Health Agency of Canada or  
43 Research Manitoba is intended nor should be inferred

44  
45  
46  
47  
48 **Contributors:** CA Hitchon contributed to the study conceptualization, funding acquisition,  
49 recruitment of participants, data curation, data analysis, and writing of original and final  
50 manuscript drafts. C Mesa contributed to the data curation by conducting and analyzing the  
51 SARS-CoV-2 assays and reviewed the draft manuscript. C Bernstein contributed to the study  
52 conceptualization, funding acquisition, recruitment of participants and both review and editing



1  
2  
3 of the manuscript. RA Marrie contributed to the study conceptualization, funding acquisition,  
4 recruitment of participants and both review and editing of the manuscript. C Card contributed  
5 to the review and editing of the manuscript. S OBrien contributed resources including data for  
6 the controls, and both review and editing of the manuscript. J Kim contributed to the study  
7 conceptualization, funding acquisition, provided resources for conducting and interpreting the  
8 SARS-CoV2 assays and contributed to the review and editing of the manuscript. All authors  
9 contributed to critical review of manuscript and approved the final version.  
10  
11  
12  
13  
14  
15

16  
17 **Acknowledgements:** We acknowledge the technical expertise of the NLHRS including A. Harris,  
18 R.Fabia, K.Cachero, H.Ellis, S.Simon, K.Peladeau and J.Walker, and the assistance of M. Moyon,  
19 M. Sevilla, S. Nanayakkara, T Shcholok, and J. Remple.  
20  
21  
22  
23

24 **Data availability statement:** Limited deidentified data from consenting participants will be  
25 made available to qualified investigators for research purposes consistent with those of the  
26 original study documents and participant consent following submission of a formal proposal to  
27 CA Hitchon, and approval by the study team, the University of Manitoba, and Shared Health  
28 and completion of signed data access agreements.  
29  
30  
31  
32  
33

34 **Competing interests:** CH: unrelated grant funding from Pfizer; Advisory board for Astra-Zeneca  
35 Canada for unrelated product, unrelated research funds from Research Manitoba, Health  
36 Sciences Center foundation, International League of Associations for Rheumatology, unrelated  
37 educational funds from the Royal College of Physicians and Surgeons of Canada. RAM: Ruth Ann  
38 Marrie receives research funding from: CIHR, Research Manitoba, Multiple Sclerosis Society of  
39 Canada, Multiple Sclerosis Scientific Foundation, Crohn's and Colitis Canada, National Multiple  
40 Sclerosis Society, the CMSC, the Arthritis Society, Brain Canada, and US Department of Defense.  
41 She is a co-investigator on a study funded in part by Biogen Idec and Roche Canada. She is  
42 supported by the Waugh Family Chair in Multiple Sclerosis. CNB: Dr Bernstein is supported by  
43 the Bingham Chair in Gastroenterology. Dr. Bernstein has served on advisory Boards for AbbVie  
44 Canada, Amgen Canada, Bristol Myers Squibb Canada, Roche Canada, Janssen Canada, Sandoz  
45 Canada, Takeda Canada, and Pfizer Canada; Consultant for Mylan Pharmaceuticals and Takeda;  
46 Educational grants from Abbvie Canada, Pfizer Canada, Takeda Canada, and Janssen Canada.  
47  
48  
49  
50  
51  
52  
53  
54  
55  
56  
57  
58  
59  
60

1  
2  
3 Speaker's panel for Abbvie Canada, Janssen Canada, Pfizer Canada, and Takeda Canada.  
4  
5 Received research funding from Abbvie Canada, Bristol Myers Squibb Canada, Sandoz Canada  
6  
7 and Pfizer Canada. CM: None. CC: Receives grant funding from PHAC and CITF through internal  
8  
9 research funding streams at PHAC. SOB: None. JK: Receives grant funding from PHAC through  
10  
11 internal research funding streams at PHAC.  
12

13 **Funding:** Study funding from Research Manitoba, Public Health Agency of Canada funding for  
14  
15 the Kim lab. The study sponsors had no role in study design, data collection, analysis,  
16  
17 interpretation, writing, or in the decision to submit the manuscript.  
18

19 **Ethics approval and consent to participate:** All subjects provided informed consent. The study  
20  
21 was approved by the University of Manitoba Health Research Ethics Board (HS24647-H2021-  
22  
23 005), Manitoba Shared Health (SH2021:009), and the Health Canada and Public Health Agency  
24  
25 of Canada Research Ethics Board (REB 2021-018P).  
26  
27  
28  
29  
30  
31

- 32  
33 1. Krammer F. SARS-CoV-2 vaccines in development. *Nature* 2020;586(7830):516-27. doi:  
34 10.1038/s41586-020-2798-3 [published Online First: 2020/09/24]  
35 2. Baden LR, El Sahly HM, Essink B, et al. Efficacy and Safety of the mRNA-1273 SARS-CoV-2 Vaccine. *The*  
36 *New England journal of medicine* 2020 doi: 10.1056/NEJMoa2035389 [published Online First:  
37 2020/12/31]  
38 3. Polack FP, Thomas SJ, Kitchin N, et al. Safety and Efficacy of the BNT162b2 mRNA Covid-19 Vaccine.  
39 *The New England journal of medicine* 2020;383(27):2603-15. doi: 10.1056/NEJMoa2034577  
40 [published Online First: 2020/12/11]  
41 4. Falsey AR, Sobieszczyk ME, Hirsch I, et al. Phase 3 Safety and Efficacy of AZD1222 (ChAdOx1 nCoV-19)  
42 Covid-19 Vaccine. *The New England journal of medicine* 2021;385(25):2348-60. doi:  
43 10.1056/NEJMoa2105290 [published Online First: 2021/09/29]  
44 5. El-Gabalawy H, Guenther LC, Bernstein CN. Epidemiology of immune-mediated inflammatory  
45 diseases: incidence, prevalence, natural history, and comorbidities. *The Journal of rheumatology*  
46 *Supplement* 2010;85:2-10. doi: 10.3899/jrheum.091461 [published Online First: 2011/02/02]  
47 6. Maddur MS, Vani J, Lacroix-Desmazes S, et al. Autoimmunity as a predisposition for infectious  
48 diseases. *PLoS pathogens* 2010;6(11):e1001077. doi: 10.1371/journal.ppat.1001077 [published  
49 Online First: 2010/11/17]  
50 7. Grainger R, Kim AHJ, Conway R, et al. COVID-19 in people with rheumatic diseases: risks, outcomes,  
51 treatment considerations. *Nature reviews Rheumatology* 2022;18(4):191-204. doi:  
52 10.1038/s41584-022-00755-x [published Online First: 2022/02/27]  
53  
54  
55  
56  
57  
58  
59  
60

- 1
- 2
- 3
- 4 8. Conway R, Grimshaw AA, Konig MF, et al. SARS-CoV-2 Infection and COVID-19 Outcomes in Rheumatic
- 5 Diseases: A Systematic Literature Review and Meta-Analysis. *Arthritis & rheumatology*
- 6 (*Hoboken, NJ*) 2022;74(5):766-75. doi: 10.1002/art.42030 [published Online First: 20220328]
- 7
- 8 9. Schiavetti I, Ponzano M, Signori A, et al. Severe outcomes of COVID-19 among patients with multiple
- 9 sclerosis under anti-CD-20 therapies: A systematic review and meta-analysis. *Multiple sclerosis*
- 10 *and related disorders* 2022;57:103358. doi: 10.1016/j.msard.2021.103358 [published Online
- 11 First: 20211105]
- 12
- 13 10. Tripathi K, Godoy Brewer G, Thu Nguyen M, et al. COVID-19 and Outcomes in Patients With
- 14 Inflammatory Bowel Disease: Systematic Review and Meta-Analysis. *Inflammatory bowel*
- 15 *diseases* 2022;28(8):1265-79. doi: 10.1093/ibd/izab236
- 16
- 17 11. Aboulatta L, Kowalec K, Delaney J, et al. Trends of COVID-19 incidence in Manitoba and public health
- 18 measures: March 2020 to February 2022. *BMC Res Notes* 2022;15(1):162. doi: 10.1186/s13104-
- 19 022-06049-5 [published Online First: 20220510]
- 20
- 21 12. Borobia AM, Carcas AJ, Pérez-Olmeda M, et al. Immunogenicity and reactogenicity of BNT162b2
- 22 booster in ChAdOx1-S-primed participants (CombiVacS): a multicentre, open-label, randomised,
- 23 controlled, phase 2 trial. *Lancet (London, England)* 2021;398(10295):121-30. doi:
- 24 10.1016/s0140-6736(21)01420-3 [published Online First: 2021/06/29]
- 25
- 26 13. Barros-Martins J, Hammerschmidt SI, Cossmann A, et al. Immune responses against SARS-CoV-2
- 27 variants after heterologous and homologous ChAdOx1 nCoV-19/BNT162b2 vaccination. *Nature*
- 28 *medicine* 2021;27(9):1525-29. doi: 10.1038/s41591-021-01449-9 [published Online First:
- 29 2021/07/16]
- 30
- 31 14. Schmidt T, Klemis V, Schub D, et al. Immunogenicity and reactogenicity of heterologous ChAdOx1
- 32 nCoV-19/mRNA vaccination. *Nature medicine* 2021;27(9):1530-35. doi: 10.1038/s41591-021-
- 33 01464-w [published Online First: 2021/07/28]
- 34
- 35 15. Information ClifH. Guidance on the Use of Standards for Race-Based and Indigenous Identity Data
- 36 Collection and Health Reporting in Canada. . Ottawa, ON, 2022.
- 37
- 38 16. Johnson TM, Michaud K, England BR. Measures of Rheumatoid Arthritis Disease Activity. *Arthritis*
- 39 *care & research* 2020;72 Suppl 10:4-26. doi: 10.1002/acr.24336 [published Online First:
- 40 2020/10/23]
- 41
- 42 17. Arora S, Isenberg DA, Castrejon I. Measures of Adult Systemic Lupus Erythematosus: Disease Activity
- 43 and Damage. *Arthritis care & research* 2020;72 Suppl 10:27-46. doi: 10.1002/acr.24221
- 44 [published Online First: 2020/10/23]
- 45
- 46 18. Witges K, Sexton K, Graff LA, et al. What Is a Flare? The Manitoba Living With IBD Study.
- 47 *Inflammatory bowel diseases* 2021 doi: 10.1093/ibd/izab192 [published Online First:
- 48 2021/08/05]
- 49
- 50 19. Sexton KA, Walker JR, Targownik LE, et al. The Inflammatory Bowel Disease Symptom Inventory: A
- 51 Patient-report Scale for Research and Clinical Application. *Inflammatory bowel diseases*
- 52 2019;25(8):1277-90. doi: 10.1093/ibd/izz038 [published Online First: 2019/03/29]
- 53
- 54 20. Kurtzke JF. Rating neurologic impairment in multiple sclerosis: an expanded disability status scale
- 55 (EDSS). *Neurology* 1983;33(11):1444-52. doi: 10.1212/wnl.33.11.1444 [published Online First:
- 56 1983/11/01]
- 57
- 58 21. Harris PA TR, Thielke R, Payne J, Gonzalez N, Conde JD. Research electronic data capture (REDCap) –
- 59 A metadata-driven methodology and workflow process for providing translational research
- 60 informatics support *J Biomed Inform* 2009 2009;42(2):377-81.
22. Cholette F, Mesa C, Harris A, et al. Dried blood spot specimens for SARS-CoV-2 antibody testing: A
- multi-site, multi-assay comparison. *PloS one* 2021;16(12):e0261003. doi:
- 10.1371/journal.pone.0261003 [published Online First: 2021/12/08]

23. Botwin GJ, Li D, Figueiredo J, et al. Adverse Events After SARS-CoV-2 mRNA Vaccination Among Patients With Inflammatory Bowel Disease. *The American journal of gastroenterology* 2021;116(8):1746-51. doi: 10.14309/ajg.000000000001342 [published Online First: 2021/05/29]
24. Ciampi E, Uribe-San-Martin R, Soler B, et al. Safety and humoral response rate of inactivated and mRNA vaccines against SARS-CoV-2 in patients with Multiple Sclerosis. *Multiple sclerosis and related disorders* 2022;59:103690. doi: 10.1016/j.msard.2022.103690 [published Online First: 2022/02/20]
25. Jena A, Mishra S, Deepak P, et al. Response to SARS-CoV-2 vaccination in immune mediated inflammatory diseases: Systematic review and meta-analysis. *Autoimmunity reviews* 2022;21(1):102927. doi: 10.1016/j.autrev.2021.102927 [published Online First: 2021/09/03]
26. Tortorella C, Aiello A, Gasperini C, et al. Humoral- and T-Cell-Specific Immune Responses to SARS-CoV-2 mRNA Vaccination in Patients With MS Using Different Disease-Modifying Therapies. *Neurology* 2022;98(5):e541-e54. doi: 10.1212/wnl.0000000000013108 [published Online First: 2021/11/24]
27. Skaria TG, Sreepakash A, Umesh R, et al. Withholding methotrexate after vaccination with ChAdOx1 nCov19 in patients with rheumatoid or psoriatic arthritis in India (MIVAC I and II): results of two, parallel, assessor-masked, randomised controlled trials. *The Lancet Rheumatology* 2022;4(11):e755-e64. doi: 10.1016/S2665-9913(22)00228-4 [published Online First: 20220912]
28. Curtis JR, Johnson SR, Anthony DD, et al. American College of Rheumatology Guidance for COVID-19 Vaccination in Patients With Rheumatic and Musculoskeletal Diseases: Version 3. *Arthritis & rheumatology (Hoboken, NJ)* 2021;73(10):e60-e75. doi: 10.1002/art.41928 [published Online First: 2021/08/05]
29. Bajwa HM, Novak F, Nilsson AC, et al. Persistently reduced humoral and sustained cellular immune response from first to third SARS-CoV-2 mRNA vaccination in anti-CD20-treated multiple sclerosis patients. *Multiple sclerosis and related disorders* 2022;60:103729. doi: 10.1016/j.msard.2022.103729 [published Online First: 2022/03/26]
30. Stefanski AL, Rincon-Arevalo H, Schrezenmeier E, et al. B cell numbers predict humoral and cellular response upon SARS-CoV-2 vaccination among patients treated with rituximab. *Arthritis & rheumatology (Hoboken, NJ)* 2021 doi: 10.1002/art.42060 [published Online First: 2021/12/29]
31. Jyssum I, Kared H, Tran TT, et al. Humoral and cellular immune responses to two and three doses of SARS-CoV-2 vaccines in rituximab-treated patients with rheumatoid arthritis: a prospective, cohort study. *The Lancet Rheumatology* 2022;4(3):e177-e87. doi: 10.1016/S2665-9913(21)00394-5 [published Online First: 20211223]
32. Apostolidis SA, Kakara M, Painter MM, et al. Cellular and humoral immune responses following SARS-CoV-2 mRNA vaccination in patients with multiple sclerosis on anti-CD20 therapy. *Nature medicine* 2021;27(11):1990-2001. doi: 10.1038/s41591-021-01507-2 [published Online First: 2021/09/16]
33. Stuart ASV, Shaw RH, Liu X, et al. Immunogenicity, safety, and reactogenicity of heterologous COVID-19 primary vaccination incorporating mRNA, viral-vector, and protein-adjuvant vaccines in the UK (Com-COV2): a single-blind, randomised, phase 2, non-inferiority trial. *Lancet (London, England)* 2022;399(10319):36-49. doi: 10.1016/s0140-6736(21)02718-5 [published Online First: 2021/12/10]
34. Follmann D, Janes HE, Buhule OD, et al. Antinucleocapsid Antibodies After SARS-CoV-2 Infection in the Blinded Phase of the Randomized, Placebo-Controlled mRNA-1273 COVID-19 Vaccine Efficacy Clinical Trial. *Annals of internal medicine* 2022;175(9):1258-65. doi: 10.7326/M22-1300 [published Online First: 20220705]

- 1  
2  
3 35. Pincus T, Yazici Y, Bergman MJ. RAPID3, an index to assess and monitor patients with rheumatoid  
4 arthritis, without formal joint counts: similar results to DAS28 and CDAI in clinical trials and  
5 clinical care. *Rheumatic diseases clinics of North America* 2009;35(4):773-8, viii. doi:  
6 10.1016/j.rdc.2009.10.008 [published Online First: 2009/12/08]  
7  
8 36. Svenungsson E, Gunnarsson I, Illescas-Bäckelin V, et al. Quick Systemic Lupus Activity Questionnaire  
9 (Q-SLAQ): a simplified version of SLAQ for patient-reported disease activity. *Lupus Sci Med*  
10 2021;8(1) doi: 10.1136/lupus-2020-000471  
11  
12 37. Koch MW, Mostert JP, Wolinsky JS, et al. Comparison of the EDSS, Timed 25-Foot Walk, and the 9-  
13 Hole Peg Test as Clinical Trial Outcomes in Relapsing-Remitting Multiple Sclerosis. *Neurology*  
14 2021;97(16):e1560-e70. doi: 10.1212/wnl.0000000000012690 [published Online First:  
15 2021/08/27]  
16  
17 38. Feng S, Phillips DJ, White T, et al. Correlates of protection against symptomatic and asymptomatic  
18 SARS-CoV-2 infection. *Nature medicine* 2021;27(11):2032-40. doi: 10.1038/s41591-021-01540-1  
19 [published Online First: 2021/10/01]  
20  
21 39. Widdifield J, Kwong JC, Chen, S, Eder L, Benchimol EI, Kaplan GG, Hitchon CA, Aviña-Zubieta JA,  
22 Lacaille D, Chung H, Bernatsky B. Vaccine Effectiveness against SARS-CoV-2 infection and severe  
23 outcomes among individuals with Immune-Mediated Inflammatory Diseases tested between  
24 March 1 and November 22, 2021: A population-based analysis. *Lancet Rheumatology* 2022;in  
25 press  
26  
27  
28  
29  
30  
31  
32  
33  
34  
35  
36  
37  
38  
39  
40  
41  
42  
43  
44  
45  
46  
47  
48  
49  
50  
51  
52  
53  
54  
55  
56  
57  
58  
59  
60

## Figure legends

**Figure 1.** Titers of anti- spike and anti-receptor binding domain IgG levels following first, second third and fourth vaccination

A. All IMIDs. B. IA. C. SARDs. D. IBD. E. MS.

Data for seroconverters only. IgG levels natural log transformed. IMIDs=immune mediated inflammatory disease; IA = inflammatory arthritis; SARDs = systemic autoimmune rheumatic disease; IBD = inflammatory bowel disease; MS = multiple sclerosis; S1= spike; RBD= receptor binding domain; V1 = first vaccine; V2 = second vaccine; V3= third vaccine. Unadjusted p values \*  $p < 0.0001$ , \*\*  $p \leq 0.001$ , \*\*\*  $p \leq 0.00$ , \*\*\*\*  $p < 0.05$ .

**Figure 2.** Titers of anti- spike and anti-receptor binding domain IgG levels 1 month following second vaccination by vaccine mixture

A. log anti-RBD. B. log anti-Spike.

Data for seroconverters only. IgG levels natural log transformed. S1= spike; RBD= receptor binding domain BNT= BNT162b2, Unadjusted p values \*  $p < 0.01$ .

**Figure 3.** Disease activity before and after each vaccine

A. Inflammatory arthritis. B. Systemic autoimmune rheumatic disease. C. Inflammatory bowel disease. D. Multiple Sclerosis.

RAPID-3 Routine Assessment of Patient Index Data 3; SLAQ Systemic lupus activity questionnaire IBDSI-SF Inflammatory bowel disease symptom inventory – short form; EDSS Expanded disability status scale. V1 vaccine one; V2 vaccine two; V3 vaccine 3; V4 vaccine 4; mo = month(s).

1  
2  
3  
4  
5  
6  
7  
8  
9  
10  
11  
12  
13  
14  
15  
16  
17  
18  
19  
20  
21  
22  
23  
24  
25  
26  
27  
28  
29  
30  
31  
32  
33  
34  
35  
36  
37  
38  
39  
40  
41  
42  
43  
44  
45  
46  
47  
48  
49  
50  
51  
52  
53  
54  
55  
56  
57  
58  
59  
60

A



B



C



D



E





Figure 2 Titers of anti- spike and anti-receptor binding domain IgG levels 1 month following second vaccination by vaccine mixture. A log anti-RBD B log anti-Spike

Data for seroconverters only. IgG levels natural log transformed. S1= spike; RBD= receptor binding domain BNT= BNT162b2, Unadjusted p values \* p<0.01

855x481mm (38 x 38 DPI)



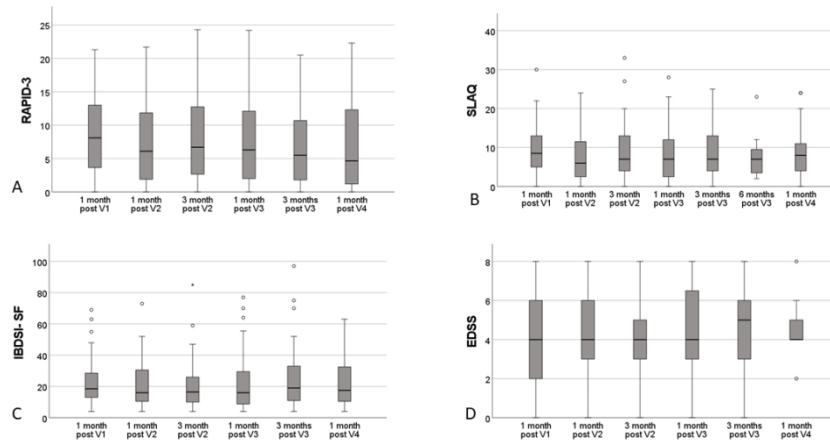

Figure 3 Disease activity before and after each vaccine

A Inflammatory arthritis B Systemic autoimmune rheumatic disease C Inflammatory bowel disease D Multiple Sclerosis

RAPID-3 Routine Assessment of Patient Index Data 3; SLAQ Systemic lupus activity questionnaire IBDSI-SF Inflammatory bowel disease symptom inventory – short form; EDSS Expanded disability status scale. V1 vaccine one; V2 vaccine two; V3 vaccine 3; V4 vaccine 4; mo = month(s).

855x481mm (38 x 38 DPI)

Hitchon et al  
Supplemental Tables and Figures

Supplemental Table 1 Categorization of IMID treatments

| Treatment<br>Disease                                                     | Inflammatory Bowel<br>Disease                                                      | Multiple Sclerosis                                                                                                          | Rheumatoid Arthritis and<br>SARDs                                                                                                                                                                                                                   |
|--------------------------------------------------------------------------|------------------------------------------------------------------------------------|-----------------------------------------------------------------------------------------------------------------------------|-----------------------------------------------------------------------------------------------------------------------------------------------------------------------------------------------------------------------------------------------------|
| <b>Corticosteroids</b><br>(N=37)                                         | Methylprednisolone<br>Prednisolone)<br>Prednisone<br>Budesonide<br>Hydrocortisone  | Methylprednisolone<br>Prednisolone<br>Prednisone                                                                            | Methylprednisolone)<br>Prednisolone<br>Prednisone<br>Triamcinolone<br>Cortisone                                                                                                                                                                     |
| <b>Anti-inflammatory or<br/>Immunomodulatory<br/>therapies</b><br>(N=77) | 5-ASA<br>Sulfasalazine                                                             | Glatiramer acetate<br>interferon-beta 1a<br>interferon-beta 1b<br>dimethyl fumarate<br>Teriflunomide<br>Peg interferon-beta | Sulfasalazine<br>sodium aurothiomalate<br>auranofin<br>aurothioglucose<br>Penicillamine<br>Hydroxychloroquine (                                                                                                                                     |
| <b>Traditional<br/>immunosuppressive<br/>therapies</b><br>(N=78)         | Azathioprine<br>Methotrexate<br>6-mercaptopurine<br>Cyclosporine<br>Tacrolimus     | Azathioprine<br>Methotrexate)<br>Mitoxantrone<br>Cyclophosphamide                                                           | Azathioprine<br>methotrexate<br>Cyclophosphamide<br>Cyclosporine<br>Leflunomide<br>Mycophenolate<br>Tacrolimus                                                                                                                                      |
| <b>Novel therapies/<br/>Biologics<sup>1</sup></b><br>(N=98)              | Infliximab<br>adalimumab<br>Golimumab<br>Ustekinumab<br>Vedolizumab<br>Tofacitinib | Natalizumab<br>Fingolimod <sup>2</sup><br>Alemtuzumab<br>Cladribine<br>Ocrelizumab                                          | Infliximab)<br>Adalimumab<br>Etanercept<br>Anakinra<br>Rituximab <sup>3</sup><br>Abatacept <sup>3</sup><br>Tocilizumab<br>Tofacitinib<br>Golimumab<br>Certolizumab<br>Upadacitinib<br>Baricitinib<br><b>Belimumab</b><br>Sekukinumab<br>Ustekinumab |

<sup>1</sup> Anti-TNF N= 51, B cell depletion N=21, Past B cell depletion N=9, Other therapy N=27 (ustekinumab n=6, vedolizumab n=6, tofacitinib n=4, tocilizumab n=2, fingolimod n=2, alemtuzumab n=1, natalizumab n=1, upadacitinib n=1)

Hitchon et al  
Supplemental Tables and Figures

Supplemental Table 2 Seroconversion rates based on vaccine mixture between first and second vaccinations

RBD= receptor binding domain; BNT= BNT162b2

Homologous (any) versus heterologous (any) vaccine combination and seroconversion 1 month post V2 anti-Spike  $\chi^2$  7.8  $p < 0.01$ ; antiRBD  $\chi^2$  6.8  $p < 0.01$ ; 1 month post V3 anti-Spike  $\chi^2$  0.5  $p = \text{NS}$ ; anti RBD  $\chi^2$  0.2  $p = \text{NS}$

|                    | 1month post V2<br>Anti-Spike<br>seroconverted<br>n/N (%) | 1month post V2<br>Anti-RBD<br>seroconverted<br>n/N (%) | 1month post V3<br>Anti-Spike<br>seroconverted<br>n/N (%) | 1month post V3<br>Anti-RBD<br>seroconverted<br>n/N (%) |
|--------------------|----------------------------------------------------------|--------------------------------------------------------|----------------------------------------------------------|--------------------------------------------------------|
| Homologous         | 137/158 (86.7)                                           | 139/158 (88.0)                                         | 130/140 (92.9)                                           | 132/140 (94.3)                                         |
| ChAdOX1-ChAdOX1    | 4/6 (66.7)                                               | 4/6 (66.7)                                             | 5/6 (83.3)                                               | 5/6 (83.3)                                             |
| BNT-BNT            | 120/139 (84.3)                                           | 122/139 (87.8)                                         | 112/121 (92.6)                                           | 113/121 (93.4)                                         |
| mRNA 1273-mRNA1273 | 13/13 (100)                                              | 13/13 (100)                                            | 13/13 (100.0)                                            | 13/13 (100.0)                                          |
| Heterologous       | 69/70 (98.6)                                             | 69/70 (98.6)                                           | 64/65 (98.5)                                             | 64/65 (98.5)                                           |
| ChAdOX1-BNT        | 30/31 (96.8)                                             | 30/31 (96.8)                                           | 27/28 (96.4)                                             | 27/28 (96.4)                                           |
| ChAdOX1-mRNA1273   | 25/25 (100)                                              | 25/25 (100)                                            | 24/24 (100.0)                                            | 24/24 (100.0)                                          |
| BNT-mRNA1273       | 14/14 (100)                                              | 14/14 (100)                                            | 13/13 (100.0)                                            | 13/13 (100.0)                                          |

Hitchon et al

## Supplemental Tables and Figures

## Supplemental Table 3 Clinical features of IMIDs not seroconverting after 2 vaccinations

IMID = immune mediated inflammatory disease; IA= inflammatory arthritis; SARDs= Systemic autoimmune rheumatic disease; MS= multiple sclerosis; IBD= inflammatory bowel disease M=male; F=female

| IMID  | Sex | Age baseline | Medication                         | vaccine combination |
|-------|-----|--------------|------------------------------------|---------------------|
| IA    | M   | 82           | Prednisone                         | BNT-BNT             |
| IA    | F   | 77           | Methotrexate + rituximab           | BNT-BNT             |
| IA    | F   | 76           | tocilizumab                        | BNT-BNT             |
| IA    | F   | 70           | methotrexate + anti-TNF            | BNT-BNT             |
| IA    | F   | 61           | mycophenolate                      | BNT-BNT             |
| SARDs | F   | 66           | rituximab + prednisone             | BNT-BNT             |
| SARDs | F   | 60           | mycophenolate                      | ChAdOX1-ChAdOX1     |
| SARDs | F   | 31           | rituximab + prednisone             | BNT-BNT             |
| SARDs | F   | 72           | mycophenolate                      | BNT-BNT             |
| SARDs | F   | 71           | mycophenolate                      | BNT-BNT             |
| SARDs | F   | 69           | mycophenolate + IV Immune globulin | BNT-BNT             |
| SARDs | F   | 69           | azathioprine + past rituximab      | BNT-BNT             |
| MS    | F   | 56           | ocrelizumab                        | ChAdOX1-BNT         |
| MS    | M   | 57           | ocrelizumab                        | BNT-BNT             |
| MS    | F   | 74           | none                               | BNT-BNT             |
| MS    | F   | 36           | ocrelizumab                        | BNT-BNT             |
| MS    | F   | 48           | fingolimod                         | BNT-BNT             |
| MS    | F   | 81           | none                               | BNT-BNT             |
| MS    | F   | 34           | ocrelizumab                        | BNT-BNT             |
| IBD   | F   | 31           | anti-TNF + prednisone              | ChAdOX1-ChAdOX1     |

Hitchon et al  
Supplemental Tables and Figures

Supplemental table 4: Clinical characteristics of anti-nucleocapsid seropositive participants

| IMID  | Age (years) | First visit tested positive | Preceding visit with serology | Anti-RBD titer at preceding visit <sup>1</sup> | Anti-S1 titer at preceding visit <sup>2</sup> | First and second vaccine | Last vaccine prior to infection | IMID treatment |
|-------|-------------|-----------------------------|-------------------------------|------------------------------------------------|-----------------------------------------------|--------------------------|---------------------------------|----------------|
| IA    | 63          | 1moV4                       | 1moV3                         | 76752                                          | 11941                                         | v/mRNA                   | mRNA1273                        | JAKi           |
| IA    | 63          | 1moV3                       | 3moV1                         | NA                                             | NA                                            | mRNA/mRNA                | mRNA1273                        | HDQ;MTX        |
| IA    | 65          | 3moV4                       | 3moV2                         | 1547                                           | 1505                                          | mRNA/mRNA                | BNT                             | HDQ            |
| IA    | 69          | 1moV4                       | 1moV3                         | 1365                                           | 1526                                          | mRNA/mRNA                | mRNA1273                        | HDQ aTNF       |
| IA    | 53          | 1moV3                       | 3moV2                         | 923                                            | 178                                           | mRNA/mRNA                | BNT                             | HDQ, MTX       |
| IA    | 68          | 1moV4                       | 1moV3                         | 4680                                           | 3403                                          | mRNA/mRNA                | BNT                             | aTNF. Pred     |
| IA    | 49          | 1moV1                       | NA                            | NA                                             | NA                                            | mRNA/mRNA                | BNT                             | HDQ MTX        |
| IA    | 62          | 1moV1                       | NA                            | NA                                             | NA                                            | mRNA/mRNA                | BNT                             | HDQ            |
| SARDs | 61          | 1moV4                       | 1moV3                         | 2756                                           | 2825                                          | v/v                      | BNT                             | HDQ            |
| SARDs | 60          | 1moV3                       | 3moV2                         | 867                                            | 556                                           | mRNA/mRNA                | BNT                             | HDQ            |
| SARDs | 62          | 1moV4                       | 1moV3                         | 17969                                          | 12938                                         | mRNA/mRNA                | BNT                             | MTX            |
| SARDs | 44          | 1moV3                       | 3moV2                         | 172                                            | 254                                           | mRNA/mRNA                | BNT                             | MTX            |
| SARDs | 64          | 1moV4                       | 3moV2                         | 74                                             | 96                                            | v/mRNA                   | BNT                             | Ritux          |
| SARDs | 38          | 1moV4                       | 1moV3                         | 3734                                           | 4104                                          | v/mRNA                   | mRNA1273                        | AZA            |
| SARDs | 39          | 3moV2                       | NA                            | NA                                             | NA                                            | v/mRNA                   | mRNA1273                        | AZA            |
| SARDs | 30          | 1moV4                       | NA                            | NA                                             | NA                                            | mRNA/mRNA                | BNT                             | aTNF           |
| MS    | 53          | 1moV2                       | NA                            | NA                                             | NA                                            | v/mRNA                   | mRNA1273                        | GLA            |
| MS    | 75          | 1moV1                       | NA                            | NA                                             | NA                                            | mRNA/mRNA                | BNT                             | None           |
| MS    | 56          | 1moV3                       | 3moV3                         | 2304                                           | 2811                                          | v/mRNA                   | mRNA1273                        | INF            |
| IBD   | 50          | 1moV2                       | NA                            | NA                                             | NA                                            | mRNA/mRNA                | BNT                             | VED            |
| IBD   | 67          | 1moV4                       | 3moV2                         | 591                                            | 584                                           | mRNA/mRNA                | mRNA1273                        | VED            |
| IBD   | 30          | 1moV4                       | 1moV3                         | 1339                                           | 1464                                          | mRNA/mRNA                | BNT                             | UST            |
| IBD   | 20          | 1moV4                       | 1moV3                         | 6221                                           | 6375                                          | mRNA/mRNA                | BNT                             | aTNF           |
| IBD   | 64          | 1moV3                       | 3moV2                         | 497                                            | 536                                           | v/mRNA                   | mRNA1273                        | 5-ASA          |
| IBD   | 45          | 1moV3                       | 3moV2                         | Neg                                            | neg                                           | mRNA/mRNA                | BNT                             | aTNF           |

IMID = immune mediated inflammatory disease; IA= inflammatory arthritis; SARDs= Systemic autoimmune rheumatic disease; MS= multiple sclerosis; IBD= inflammatory bowel disease; NA not available (no prior visit with serology data). 1moV1 = 1 month post first vaccine, 1moV2 = 1 month post second vaccine; 3moV2 = 3 months post second vaccine; 1moV3 = 1 month post third vaccine; 1moV4 = 1 month post fourth vaccine

<sup>1</sup> anti-Receptor Binding Domain BAU/ml; median (interquartile range) for all samples 1moV2 1686.8 (2199.44); 3moV2 555.8 (809.3); 1moV3 4280.3(6380.6)

<sup>2</sup> anti-Spike BAU/ml; median values for all samples 1moV2 1835 (2448); 3moV2 629.1 (883.4); 1moV3 4280.3(6380.6)

Hitchon et al  
Supplemental Tables and Figures

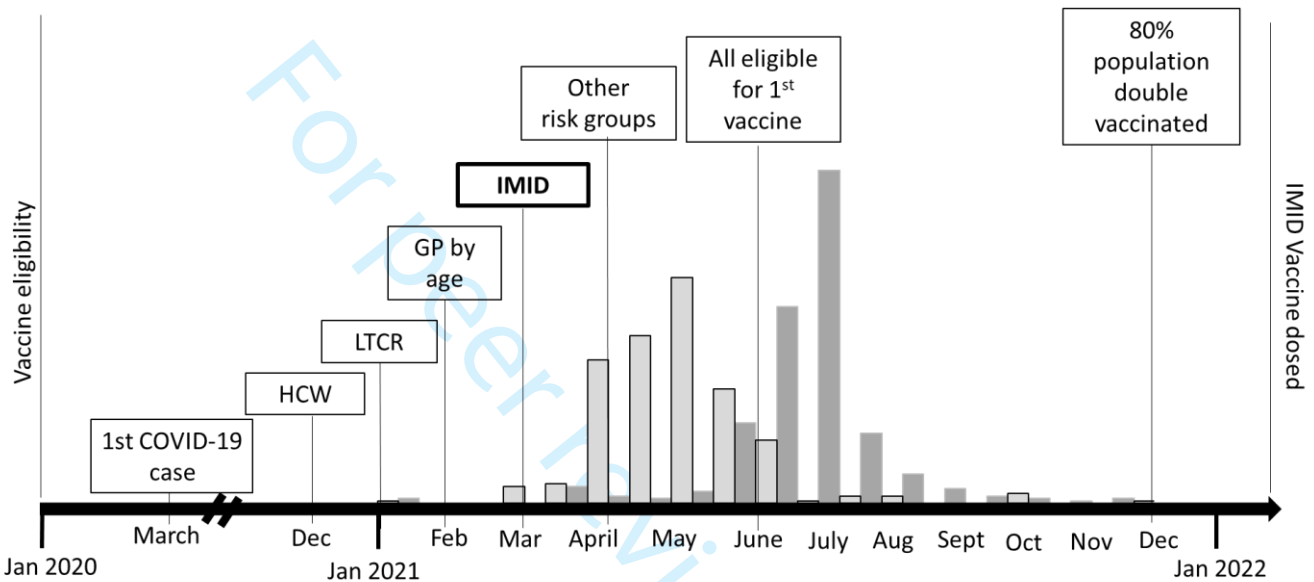

Supplemental Figure 1 Covid-19 vaccination timeline

HCW= health care workers; LTCR= long term care residents, GP= general population, IMID=immune mediated inflammatory disease; Bars indicate time when study participants (IMIDs) received vaccine. Light grey bars indicate time of first vaccine (V1); dark grey bars indicate time of second vaccine (V2).

Hitchon et al  
Supplemental Tables and Figures

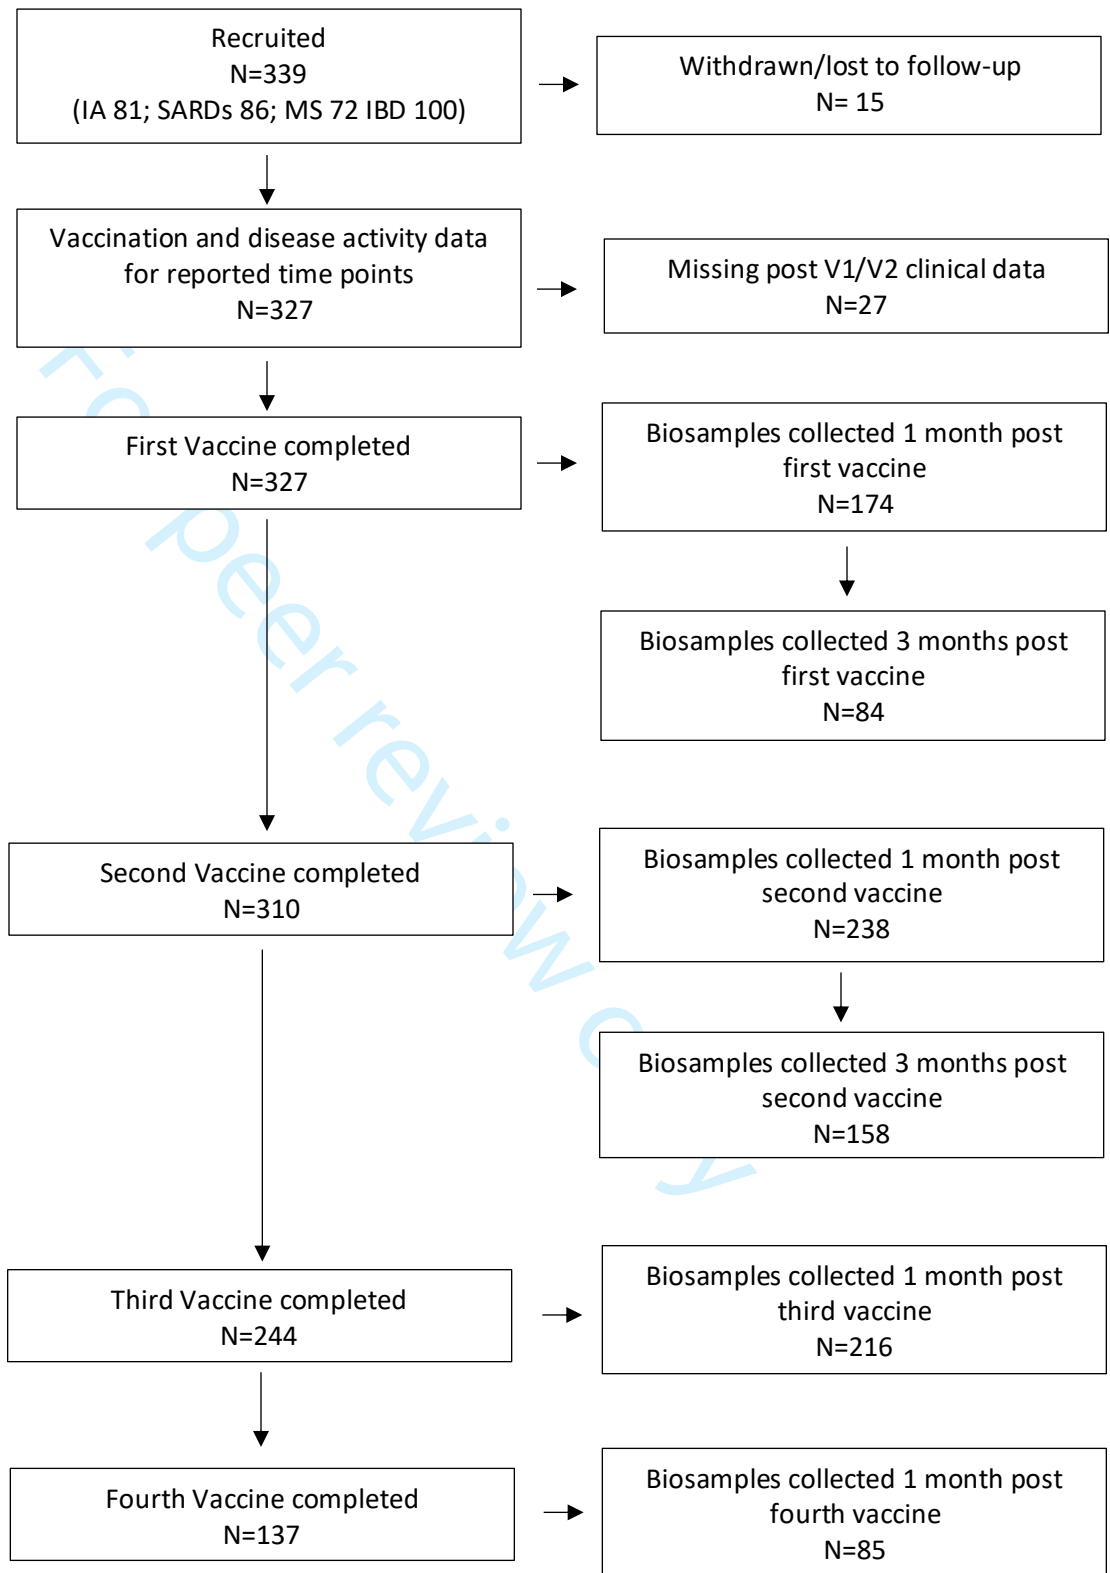

Supplemental Figure 2 Recruitment and sample acquisition chart

Hitchon et al  
Supplemental Tables and Figures

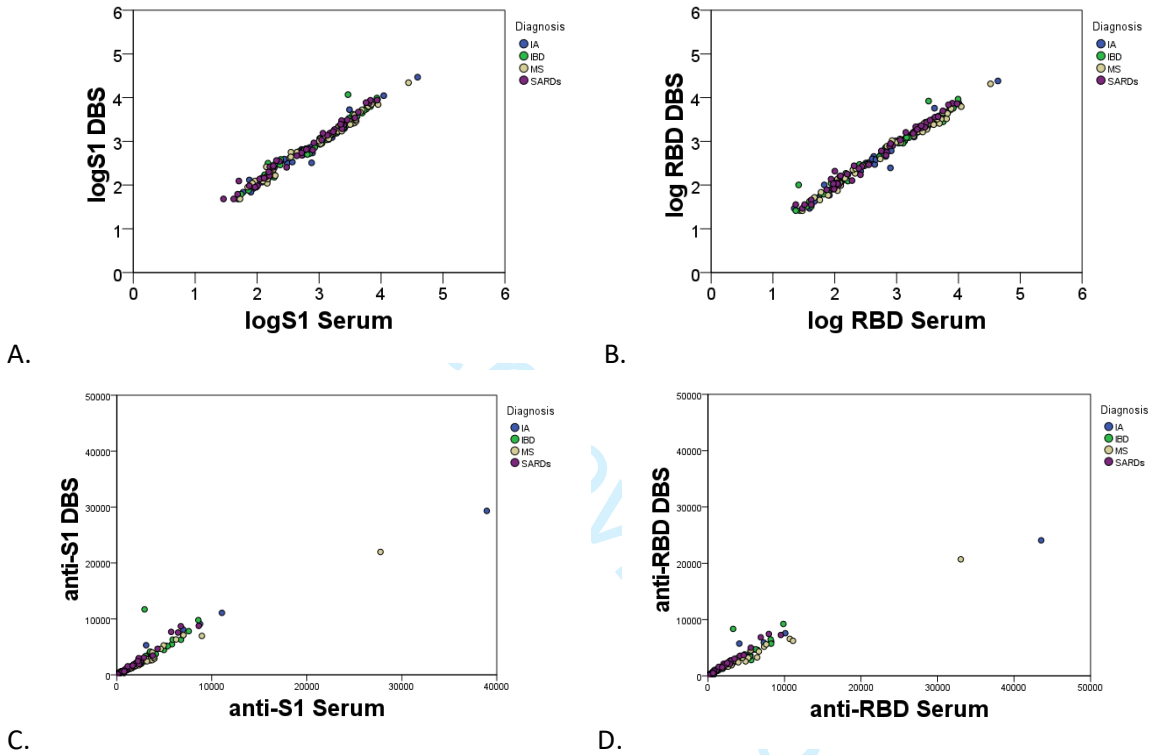

Supplemental Figure 3 Correlation between assays performed using serum and dried blood spot samples. A.  $\log_{10}$  Anti-S1 B  $\log_{10}$  anti-RBD, C. anti-S1 BAU/ml D anti RBD BAU/ml (Kendalls tau b correlation co-efficient anti-S1 BAU/ml= 0.92; anti-RBD BAU/ml=0.93)



Hitchon et al  
Supplemental Tables and Figures



Supplemental Figure 4 Anti-SARS-CoV2 titers 1 month post third vaccine based on first and second vaccine mixture.

RBD= Receptor binding domain; S1= Spike 1. All comparisons p=NS

Hitchon et al  
Supplemental Tables and Figures

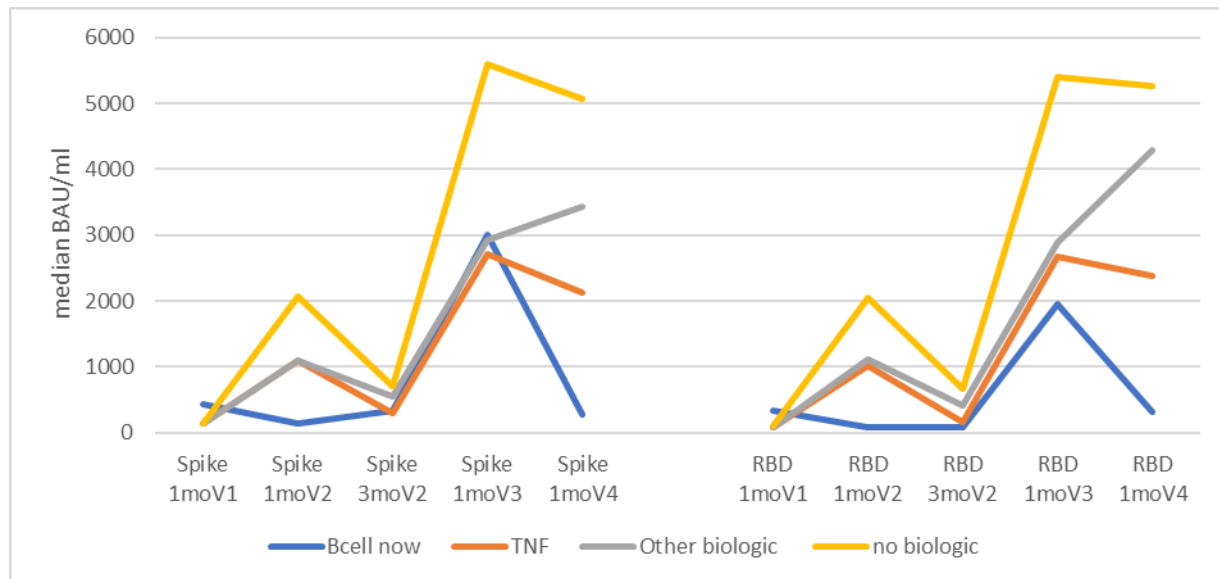

|         | B cell targeting now | anti-TNF | other biologic | no biologic | B cell targeting past |
|---------|----------------------|----------|----------------|-------------|-----------------------|
| N 1moV1 | 2                    | 14       | 8              | 77          | 2                     |
| N 1moV2 | 5                    | 37       | 16             | 152         | 4                     |
| N 3moV2 | 5                    | 34       | 20             | 154         | 5                     |
| N 1moV3 | 8                    | 34       | 19             | 140         | 5                     |
| N 1moV4 | 5                    | 18       | 11             | 46          | 5                     |

Supplemental Figure 5 Median titers of anti-Spike and anti-RBD for individuals on different biologic categories and number participants in each treatment category for each visit.

Hitchon et al  
Supplemental Tables and Figures

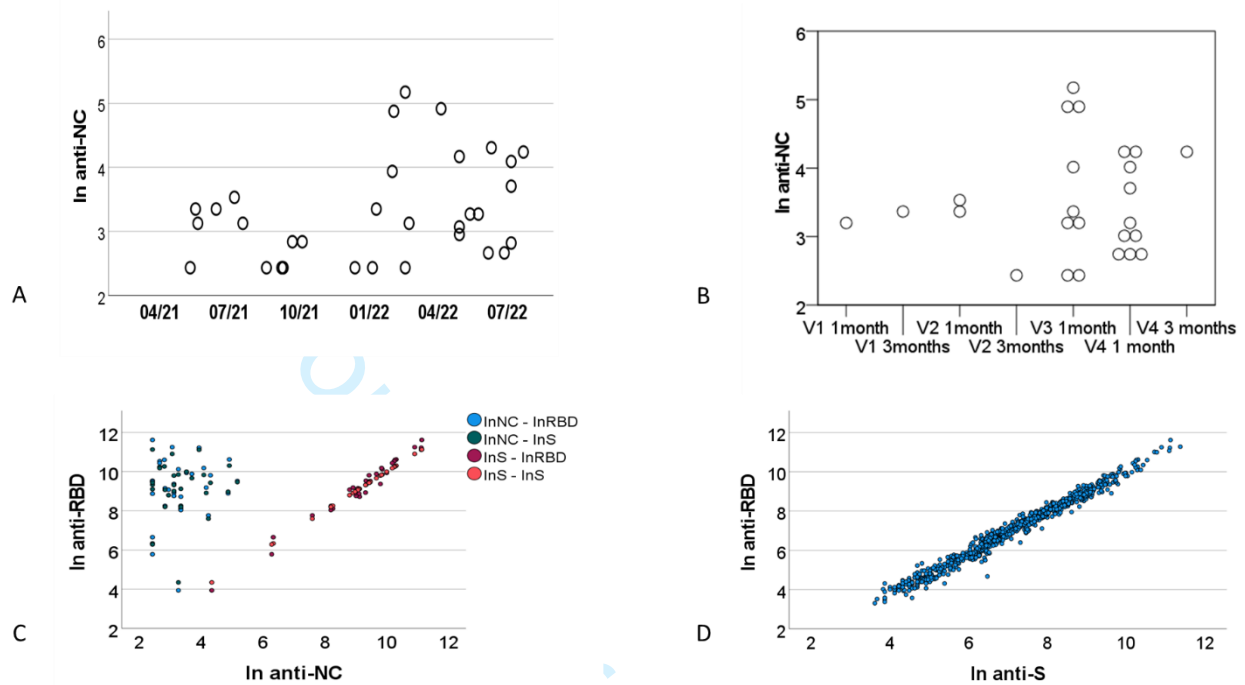

Supplemental Figure 6 Anti-Nucleocapsid antibody levels and correlations with Anti-Spike and Anti-Receptor Binding Domain antibodies

- A. Anti-NC titer by Calendar month/year B. Anti-NC titer by Study visit C. Correlation of anti-NC anti RBD and anti-S1 titers in samples seropositive for anti-NC D. Correlation of anti-RBD and anti-S1 titers in all seropositive samples.

NC = nucleocapsid S = Spike; RBD = receptor binding domain; ln = natural log. V1 = vaccine 1; V2 = vaccine 2; V3 = vaccine 3; V4= vaccine 4. Values are natural log transformed BAU/ml.

Spearman correlation coefficient anti-NC with anti-S1 = 0.06 (p=NS); anti-NC with anti-RBD = 0.03 (p=NS); anti-S with anti-RBD 0.96 p<0.001. Figure 3 Disease activity before and after each vaccine

A Inflammatory arthritis B Systemic autoimmune rheumatic disease C Inflammatory bowel disease D Multiple Sclerosis

RAPID-3 Routine Assessment of Patient Index Data 3; SLAQ Systemic lupus activity questionnaire IBDSI-SF Inflammatory bowel disease symptom inventory – short form; EDSS Expanded disability status scale. V1 vaccine one; V2 vaccine two; V3 vaccine 3; V4 vaccine 4; mo = month(s).

Hitchon et al  
Supplemental Tables and Figures

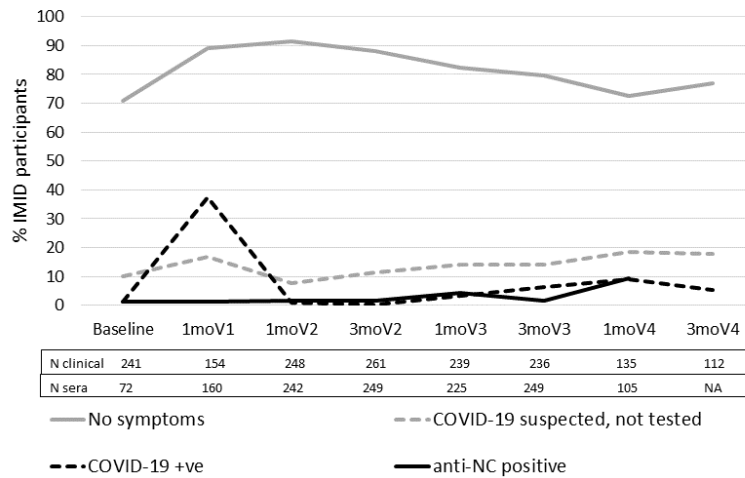

Supplemental Figure 7 COVID-19 infection

Grey line = no COVID-19 symptoms reported; Dashed grey line = COVID-19 suspected but not tested; dashed black line = COVID-19 infection confirmed by community based testing (rapid detection or polymerase chain reaction test); solid black line = proportion anti-nucleocapsid seropositive.

V1 vaccine one; V2 vaccine two; V3 vaccine 3; V4 vaccine 4; mo = month(s); N = number

## STROBE Statement—checklist of items that should be included in reports of observational studies

|                              | Item No | Recommendation                                                                                                                                                                                                                                                                                                                                                                                                                                                         | Page No |
|------------------------------|---------|------------------------------------------------------------------------------------------------------------------------------------------------------------------------------------------------------------------------------------------------------------------------------------------------------------------------------------------------------------------------------------------------------------------------------------------------------------------------|---------|
| <b>Title and abstract</b>    | 1       | (a) Indicate the study's design with a commonly used term in the title or the abstract                                                                                                                                                                                                                                                                                                                                                                                 | 1       |
|                              |         | (b) Provide in the abstract an informative and balanced summary of what was done and what was found                                                                                                                                                                                                                                                                                                                                                                    | 4       |
| <b>Introduction</b>          |         |                                                                                                                                                                                                                                                                                                                                                                                                                                                                        |         |
| Background/rationale         | 2       | Explain the scientific background and rationale for the investigation being reported                                                                                                                                                                                                                                                                                                                                                                                   | 7       |
| Objectives                   | 3       | State specific objectives, including any prespecified hypotheses                                                                                                                                                                                                                                                                                                                                                                                                       | 7-8     |
| <b>Methods</b>               |         |                                                                                                                                                                                                                                                                                                                                                                                                                                                                        |         |
| Study design                 | 4       | Present key elements of study design early in the paper                                                                                                                                                                                                                                                                                                                                                                                                                | 7-8     |
| Setting                      | 5       | Describe the setting, locations, and relevant dates, including periods of recruitment, exposure, follow-up, and data collection                                                                                                                                                                                                                                                                                                                                        | 7-8     |
| Participants                 | 6       | (a) <i>Cohort study</i> —Give the eligibility criteria, and the sources and methods of selection of participants. Describe methods of follow-up<br><i>Case-control study</i> —Give the eligibility criteria, and the sources and methods of case ascertainment and control selection. Give the rationale for the choice of cases and controls<br><i>Cross-sectional study</i> —Give the eligibility criteria, and the sources and methods of selection of participants | 7-8     |
|                              |         | (b) <i>Cohort study</i> —For matched studies, give matching criteria and number of exposed and unexposed<br><i>Case-control study</i> —For matched studies, give matching criteria and the number of controls per case                                                                                                                                                                                                                                                 |         |
| Variables                    | 7       | Clearly define all outcomes, exposures, predictors, potential confounders, and effect modifiers. Give diagnostic criteria, if applicable                                                                                                                                                                                                                                                                                                                               | 8-9     |
| Data sources/<br>measurement | 8*      | For each variable of interest, give sources of data and details of methods of assessment (measurement). Describe comparability of assessment methods if there is more than one group                                                                                                                                                                                                                                                                                   | 7-9     |
| Bias                         | 9       | Describe any efforts to address potential sources of bias                                                                                                                                                                                                                                                                                                                                                                                                              | 7-9     |
| Study size                   | 10      | Explain how the study size was arrived at                                                                                                                                                                                                                                                                                                                                                                                                                              |         |
| Quantitative variables       | 11      | Explain how quantitative variables were handled in the analyses. If applicable, describe which groupings were chosen and why                                                                                                                                                                                                                                                                                                                                           | 7-9     |
| Statistical methods          | 12      | (a) Describe all statistical methods, including those used to control for confounding                                                                                                                                                                                                                                                                                                                                                                                  | 9       |
|                              |         | (b) Describe any methods used to examine subgroups and interactions                                                                                                                                                                                                                                                                                                                                                                                                    | 9       |
|                              |         | (c) Explain how missing data were addressed                                                                                                                                                                                                                                                                                                                                                                                                                            | 8       |
|                              |         | (d) <i>Cohort study</i> —If applicable, explain how loss to follow-up was addressed<br><i>Case-control study</i> —If applicable, explain how matching of cases and controls was addressed<br><i>Cross-sectional study</i> —If applicable, describe analytical methods taking account of sampling strategy                                                                                                                                                              | NA      |
|                              |         | (e) Describe any sensitivity analyses                                                                                                                                                                                                                                                                                                                                                                                                                                  |         |

Continued on next page

**Results**

|                  |     |                                                                                                                                                                                                              |                            |
|------------------|-----|--------------------------------------------------------------------------------------------------------------------------------------------------------------------------------------------------------------|----------------------------|
| Participants     | 13* | (a) Report numbers of individuals at each stage of study—eg numbers potentially eligible, examined for eligibility, confirmed eligible, included in the study, completing follow-up, and analysed            | 10 and S Fig 2             |
|                  |     | (b) Give reasons for non-participation at each stage                                                                                                                                                         | S Fig 2                    |
|                  |     | (c) Consider use of a flow diagram                                                                                                                                                                           | S Fig2                     |
| Descriptive data | 14* | (a) Give characteristics of study participants (eg demographic, clinical, social) and information on exposures and potential confounders                                                                     | 10 Table1                  |
|                  |     | (b) Indicate number of participants with missing data for each variable of interest                                                                                                                          | Table 1                    |
|                  |     | (c) <i>Cohort study</i> —Summarise follow-up time (eg, average and total amount)                                                                                                                             |                            |
| Outcome data     | 15* | <i>Cohort study</i> —Report numbers of outcome events or summary measures over time                                                                                                                          | <i>Table 1</i>             |
|                  |     | <i>Case-control study</i> —Report numbers in each exposure category, or summary measures of exposure                                                                                                         |                            |
|                  |     | <i>Cross-sectional study</i> —Report numbers of outcome events or summary measures                                                                                                                           |                            |
| Main results     | 16  | (a) Give unadjusted estimates and, if applicable, confounder-adjusted estimates and their precision (eg, 95% confidence interval). Make clear which confounders were adjusted for and why they were included | 10-12 Figure 1,2,4 Table 3 |
|                  |     | (b) Report category boundaries when continuous variables were categorized                                                                                                                                    |                            |
|                  |     | (c) If relevant, consider translating estimates of relative risk into absolute risk for a meaningful time period                                                                                             |                            |
| Other analyses   | 17  | Report other analyses done—eg analyses of subgroups and interactions, and sensitivity analyses                                                                                                               | 10-12                      |

**Discussion**

|                  |    |                                                                                                                                                                            |       |
|------------------|----|----------------------------------------------------------------------------------------------------------------------------------------------------------------------------|-------|
| Key results      | 18 | Summarise key results with reference to study objectives                                                                                                                   | 12    |
| Limitations      | 19 | Discuss limitations of the study, taking into account sources of potential bias or imprecision. Discuss both direction and magnitude of any potential bias                 | 13-14 |
| Interpretation   | 20 | Give a cautious overall interpretation of results considering objectives, limitations, multiplicity of analyses, results from similar studies, and other relevant evidence | 13-14 |
| Generalisability | 21 | Discuss the generalisability (external validity) of the study results                                                                                                      | 14    |

**Other information**

|         |    |                                                                                                                                                               |    |
|---------|----|---------------------------------------------------------------------------------------------------------------------------------------------------------------|----|
| Funding | 22 | Give the source of funding and the role of the funders for the present study and, if applicable, for the original study on which the present article is based | 15 |
|---------|----|---------------------------------------------------------------------------------------------------------------------------------------------------------------|----|

\*Give information separately for cases and controls in case-control studies and, if applicable, for exposed and unexposed groups in cohort and cross-sectional studies.

**Note:** An Explanation and Elaboration article discusses each checklist item and gives methodological background and published examples of transparent reporting. The STROBE checklist is best used in conjunction with this article (freely available on the Web sites of PLoS Medicine at <http://www.plosmedicine.org/>, Annals of Internal Medicine at <http://www.annals.org/>, and Epidemiology at <http://www.epidem.com/>). Information on the STROBE Initiative is available at [www.strobe-statement.org](http://www.strobe-statement.org).
