# Supplementary material
Source: PubMed Central journal article supplement (PMC10254677)
Supplement: bmjopen-2022-071397supp001.pdf [file bmjopen-2022-071397supp001.pdf]

Hitchon et al  
Supplemental Tables and Figures

Supplemental Table 1 Categorization of IMID treatments

| Treatment<br>Disease                                                     | Inflammatory Bowel<br>Disease                                                      | Multiple Sclerosis                                                                                                          | Rheumatoid Arthritis and<br>SARDs                                                                                                                                                                                                                   |
|--------------------------------------------------------------------------|------------------------------------------------------------------------------------|-----------------------------------------------------------------------------------------------------------------------------|-----------------------------------------------------------------------------------------------------------------------------------------------------------------------------------------------------------------------------------------------------|
| <b>Corticosteroids</b><br>(N=37)                                         | Methylprednisolone<br>Prednisolone)<br>Prednisone<br>Budesonide<br>Hydrocortisone  | Methylprednisolone<br>Prednisolone<br>Prednisone                                                                            | Methylprednisolone)<br>Prednisolone<br>Prednisone<br>Triamcinolone<br>Cortisone                                                                                                                                                                     |
| <b>Anti-inflammatory or<br/>Immunomodulatory<br/>therapies</b><br>(N=77) | 5-ASA<br>Sulfasalazine                                                             | Glatiramer acetate<br>interferon-beta 1a<br>interferon-beta 1b<br>dimethyl fumarate<br>Teriflunomide<br>Peg interferon-beta | Sulfasalazine<br>sodium aurothiomalate<br>auranofin<br>aurothioglucose<br>Penicillamine<br>Hydroxychloroquine (                                                                                                                                     |
| <b>Traditional<br/>immunosuppressive<br/>therapies</b><br>(N=78)         | Azathioprine<br>Methotrexate<br>6-mercaptopurine<br>Cyclosporine<br>Tacrolimus     | Azathioprine<br>Methotrexate)<br>Mitoxantrone<br>Cyclophosphamide                                                           | Azathioprine<br>methotrexate<br>Cyclophosphamide<br>Cyclosporine<br>Leflunomide<br>Mycophenolate<br>Tacrolimus                                                                                                                                      |
| <b>Novel therapies/<br/>Biologics<sup>1</sup></b><br>(N=98)              | Infliximab<br>adalimumab<br>Golimumab<br>Ustekinumab<br>Vedolizumab<br>Tofacitinib | Natalizumab<br>Fingolimod <sup>2</sup><br>Alemtuzumab<br>Cladribine<br>Ocrelizumab                                          | Infliximab)<br>Adalimumab<br>Etanercept<br>Anakinra<br>Rituximab <sup>3</sup><br>Abatacept <sup>3</sup><br>Tocilizumab<br>Tofacitinib<br>Golimumab<br>Certolizumab<br>Upadacitinib<br>Baricitinib<br><b>Belimumab</b><br>Sekukinumab<br>Ustekinumab |

<sup>1</sup> Anti-TNF N= 51, B cell depletion N=21, Past B cell depletion N=9, Other therapy N=27 (ustekinumab n=6, vedolizumab n=6, tofacitinib n=4, tocilizumab n=2, fingolimod n=2, alemtuzumab n=1, natalizumab n=1, upadacitinib n=1)

Hitchon et al  
Supplemental Tables and Figures

Supplemental Table 2 Seroconversion rates based on vaccine mixture between first and second vaccinations

RBD= receptor binding domain; BNT= BNT162b2

Homologous (any) versus heterologous (any) vaccine combination and seroconversion 1 month post V2 anti-Spike  $\chi^2$  7.8  $p < 0.01$ ; antiRBD  $\chi^2$  6.8  $p < 0.01$ ; 1 month post V3 anti-Spike  $\chi^2$  0.5  $p = \text{NS}$ ; anti RBD  $\chi^2$  0.2  $p = \text{NS}$

|                    | 1month post V2<br>Anti-Spike<br>seroconverted<br>n/N (%) | 1month post V2<br>Anti-RBD<br>seroconverted<br>n/N (%) | 1month post V3<br>Anti-Spike<br>seroconverted<br>n/N (%) | 1month post V3<br>Anti-RBD<br>seroconverted<br>n/N (%) |
|--------------------|----------------------------------------------------------|--------------------------------------------------------|----------------------------------------------------------|--------------------------------------------------------|
| Homologous         | 137/158 (86.7)                                           | 139/158 (88.0)                                         | 130/140 (92.9)                                           | 132/140 (94.3)                                         |
| ChAdOX1-ChAdOX1    | 4/6 (66.7)                                               | 4/6 (66.7)                                             | 5/6 (83.3)                                               | 5/6 (83.3)                                             |
| BNT-BNT            | 120/139 (84.3)                                           | 122/139 (87.8)                                         | 112/121 (92.6)                                           | 113/121 (93.4)                                         |
| mRNA 1273-mRNA1273 | 13/13 (100)                                              | 13/13 (100)                                            | 13/13 (100.0)                                            | 13/13 (100.0)                                          |
| Heterologous       | 69/70 (98.6)                                             | 69/70 (98.6)                                           | 64/65 (98.5)                                             | 64/65 (98.5)                                           |
| ChAdOX1-BNT        | 30/31 (96.8)                                             | 30/31 (96.8)                                           | 27/28 (96.4)                                             | 27/28 (96.4)                                           |
| ChAdOX1-mRNA1273   | 25/25 (100)                                              | 25/25 (100)                                            | 24/24 (100.0)                                            | 24/24 (100.0)                                          |
| BNT-mRNA1273       | 14/14 (100)                                              | 14/14 (100)                                            | 13/13 (100.0)                                            | 13/13 (100.0)                                          |

Hitchon et al  
Supplemental Tables and Figures

Supplemental Table 3 Clinical features of IMIDs not seroconverting after 2 vaccinations

IMID = immune mediated inflammatory disease; IA= inflammatory arthritis; SARDs= Systemic autoimmune rheumatic disease; MS= multiple sclerosis; IBD= inflammatory bowel disease M=male; F=female

| IMID  | Sex | Age baseline | Medication                         | vaccine combination |
|-------|-----|--------------|------------------------------------|---------------------|
| IA    | M   | 82           | Prednisone                         | BNT-BNT             |
| IA    | F   | 77           | Methotrexate + rituximab           | BNT-BNT             |
| IA    | F   | 76           | tocilizumab                        | BNT-BNT             |
| IA    | F   | 70           | methotrexate + anti-TNF            | BNT-BNT             |
| IA    | F   | 61           | mycophenolate                      | BNT-BNT             |
| SARDs | F   | 66           | rituximab + prednisone             | BNT-BNT             |
| SARDs | F   | 60           | mycophenolate                      | ChAdOX1-ChAdOX1     |
| SARDs | F   | 31           | rituximab + prednisone             | BNT-BNT             |
| SARDs | F   | 72           | mycophenolate                      | BNT-BNT             |
| SARDs | F   | 71           | mycophenolate                      | BNT-BNT             |
| SARDs | F   | 69           | mycophenolate + IV Immune globulin | BNT-BNT             |
| SARDs | F   | 69           | azathioprine + past rituximab      | BNT-BNT             |
| MS    | F   | 56           | ocrelizumab                        | ChAdOX1-BNT         |
| MS    | M   | 57           | ocrelizumab                        | BNT-BNT             |
| MS    | F   | 74           | none                               | BNT-BNT             |
| MS    | F   | 36           | ocrelizumab                        | BNT-BNT             |
| MS    | F   | 48           | fingolimod                         | BNT-BNT             |
| MS    | F   | 81           | none                               | BNT-BNT             |
| MS    | F   | 34           | ocrelizumab                        | BNT-BNT             |
| IBD   | F   | 31           | anti-TNF + prednisone              | ChAdOX1-ChAdOX1     |

Hitchon et al  
Supplemental Tables and Figures

Supplemental table 4: Clinical characteristics of anti-nucleocapsid seropositive participants

| IMID  | Age (years) | First visit tested positive | Preceding visit with serology | Anti-RBD titer at preceding visit <sup>1</sup> | Anti-S1 titer at preceding visit <sup>2</sup> | First and second vaccine | Last vaccine prior to infection | IMID treatment |
|-------|-------------|-----------------------------|-------------------------------|------------------------------------------------|-----------------------------------------------|--------------------------|---------------------------------|----------------|
| IA    | 63          | 1moV4                       | 1moV3                         | 76752                                          | 11941                                         | v/mRNA                   | mRNA1273                        | JAKi           |
| IA    | 63          | 1moV3                       | 3moV1                         | NA                                             | NA                                            | mRNA/mRNA                | mRNA1273                        | HDQ;MTX        |
| IA    | 65          | 3moV4                       | 3moV2                         | 1547                                           | 1505                                          | mRNA/mRNA                | BNT                             | HDQ            |
| IA    | 69          | 1moV4                       | 1moV3                         | 1365                                           | 1526                                          | mRNA/mRNA                | mRNA1273                        | HDQ aTNF       |
| IA    | 53          | 1moV3                       | 3moV2                         | 923                                            | 178                                           | mRNA/mRNA                | BNT                             | HDQ, MTX       |
| IA    | 68          | 1moV4                       | 1moV3                         | 4680                                           | 3403                                          | mRNA/mRNA                | BNT                             | aTNF. Pred     |
| IA    | 49          | 1moV1                       | NA                            | NA                                             | NA                                            | mRNA/mRNA                | BNT                             | HDQ MTX        |
| IA    | 62          | 1moV1                       | NA                            | NA                                             | NA                                            | mRNA/mRNA                | BNT                             | HDQ            |
| SARDs | 61          | 1moV4                       | 1moV3                         | 2756                                           | 2825                                          | v/v                      | BNT                             | HDQ            |
| SARDs | 60          | 1moV3                       | 3moV2                         | 867                                            | 556                                           | mRNA/mRNA                | BNT                             | HDQ            |
| SARDs | 62          | 1moV4                       | 1moV3                         | 17969                                          | 12938                                         | mRNA/mRNA                | BNT                             | MTX            |
| SARDs | 44          | 1moV3                       | 3moV2                         | 172                                            | 254                                           | mRNA/mRNA                | BNT                             | MTX            |
| SARDs | 64          | 1moV4                       | 3moV2                         | 74                                             | 96                                            | v/mRNA                   | BNT                             | Ritux          |
| SARDs | 38          | 1moV4                       | 1moV3                         | 3734                                           | 4104                                          | v/mRNA                   | mRNA1273                        | AZA            |
| SARDs | 39          | 3moV2                       | NA                            | NA                                             | NA                                            | v/mRNA                   | mRNA1273                        | AZA            |
| SARDs | 30          | 1moV4                       | NA                            | NA                                             | NA                                            | mRNA/mRNA                | BNT                             | aTNF           |
| MS    | 53          | 1moV2                       | NA                            | NA                                             | NA                                            | v/mRNA                   | mRNA1273                        | GLA            |
| MS    | 75          | 1moV1                       | NA                            | NA                                             | NA                                            | mRNA/mRNA                | BNT                             | None           |
| MS    | 56          | 1moV3                       | 3moV3                         | 2304                                           | 2811                                          | v/mRNA                   | mRNA1273                        | INF            |
| IBD   | 50          | 1moV2                       | NA                            | NA                                             | NA                                            | mRNA/mRNA                | BNT                             | VED            |
| IBD   | 67          | 1moV4                       | 3moV2                         | 591                                            | 584                                           | mRNA/mRNA                | mRNA1273                        | VED            |
| IBD   | 30          | 1moV4                       | 1moV3                         | 1339                                           | 1464                                          | mRNA/mRNA                | BNT                             | UST            |
| IBD   | 20          | 1moV4                       | 1moV3                         | 6221                                           | 6375                                          | mRNA/mRNA                | BNT                             | aTNF           |
| IBD   | 64          | 1moV3                       | 3moV2                         | 497                                            | 536                                           | v/mRNA                   | mRNA1273                        | 5-ASA          |
| IBD   | 45          | 1moV3                       | 3moV2                         | Neg                                            | neg                                           | mRNA/mRNA                | BNT                             | aTNF           |

IMID = immune mediated inflammatory disease; IA= inflammatory arthritis; SARDs= Systemic autoimmune rheumatic disease; MS= multiple sclerosis; IBD= inflammatory bowel disease; NA not available (no prior visit with serology data). 1moV1 = 1 month post first vaccine, 1moV2 = 1 month post second vaccine; 3moV2 = 3 months post second vaccine; 1moV3 = 1 month post third vaccine; 1moV4 = 1 month post fourth vaccine

<sup>1</sup> anti-Receptor Binding Domain BAU/ml; median (interquartile range) for all samples 1moV2 1686.8 (2199.44); 3moV2 555.8 (809.3); 1moV3 4280.3(6380.6)

<sup>2</sup> anti-Spike BAU/ml; median values for all samples 1moV2 1835 (2448); 3moV2 629.1 (883.4); 1moV3 4280.3(6380.6)

Hitchon et al  
Supplemental Tables and Figures

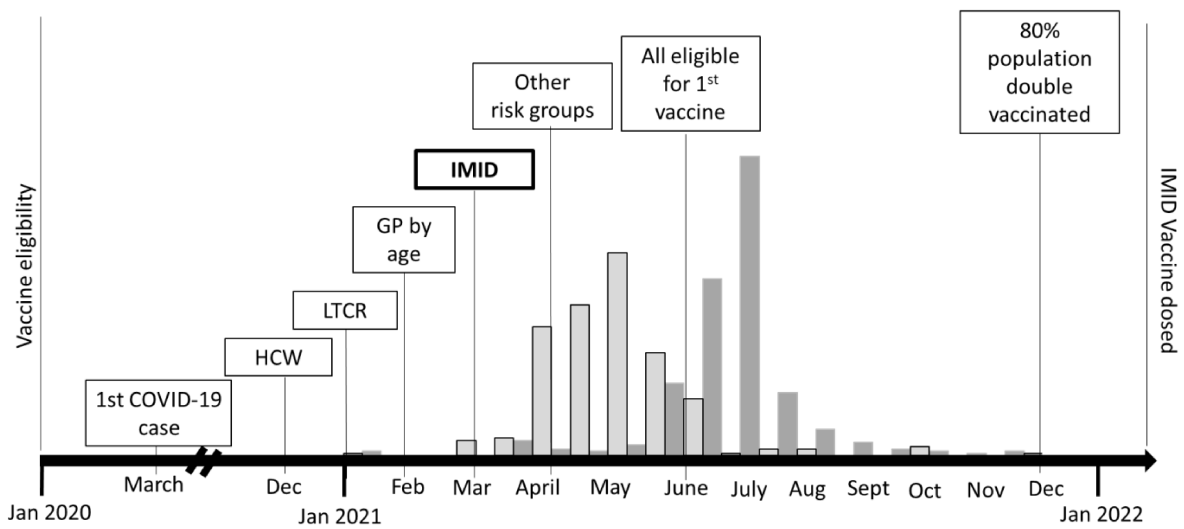

Supplemental Figure 1 Covid-19 vaccination timeline

HCW= health care workers; LTCR= long term care residents, GP= general population, IMiD=immune mediated inflammatory disease; Bars indicate time when study participants (IMiDs) received vaccine. Light grey bars indicate time of first vaccine (V1); dark grey bars indicate time of second vaccine (V2).

Hitchon et al  
Supplemental Tables and Figures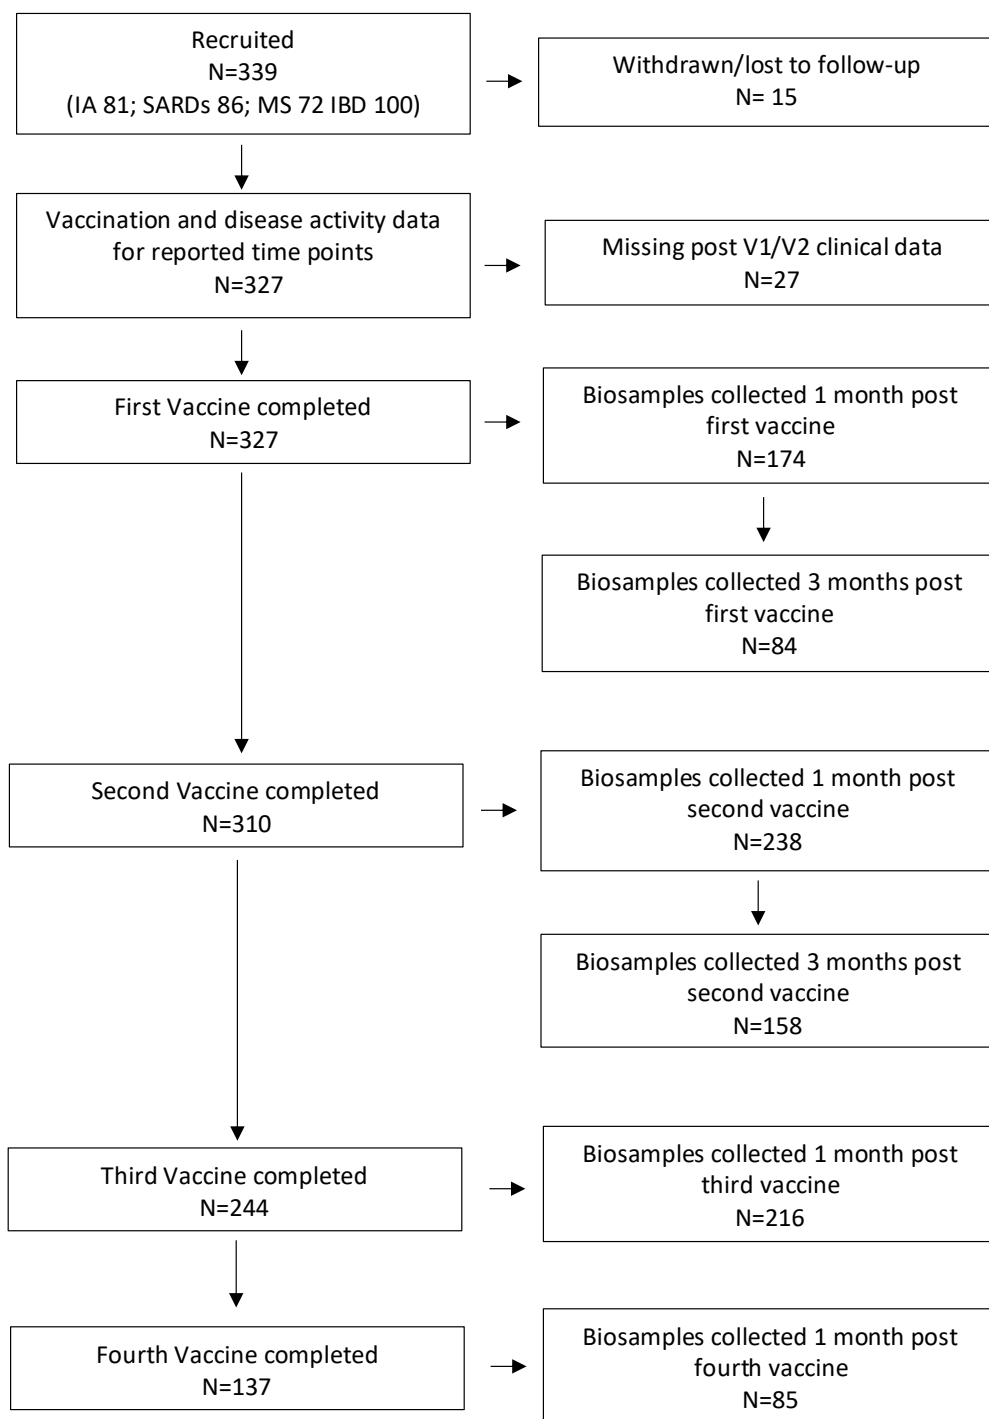

Supplemental Figure 2 Recruitment and sample acquisition chart

Hitchon et al  
Supplemental Tables and Figures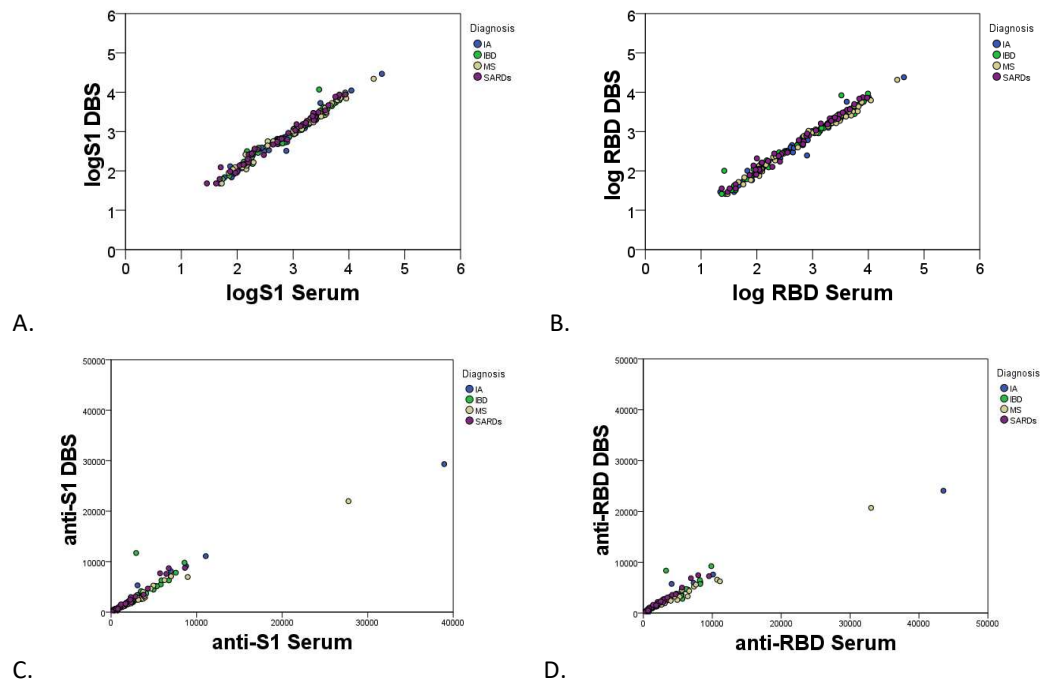

Supplemental Figure 3 Correlation between assays performed using serum and dried blood spot samples. A.  $\log$  Anti-S1 B  $\log$  anti-RBD, C. anti-S1 BAU/ml D anti RBD BAU/ml (Kendalls tau b correlation co-efficient anti-S1 BAU/ml= 0.92; anti-RBD BAU/ml=0.93)

Hitchon et al  
Supplemental Tables and Figures

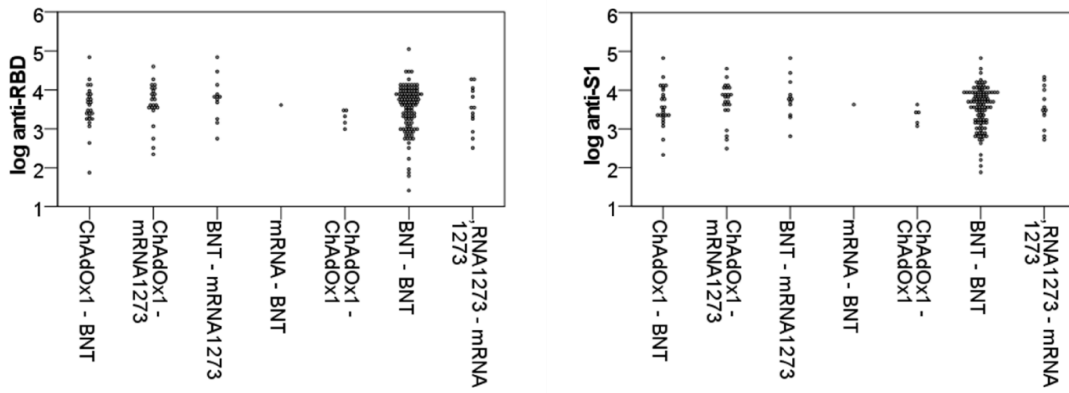

Supplemental Figure 4 Anti-SARS-CoV2 titers 1 month post third vaccine based on first and second vaccine mixture.

RBD= Receptor binding domain; S1= Spike 1. All comparisons p=NS



Hitchon et al  
Supplemental Tables and Figures

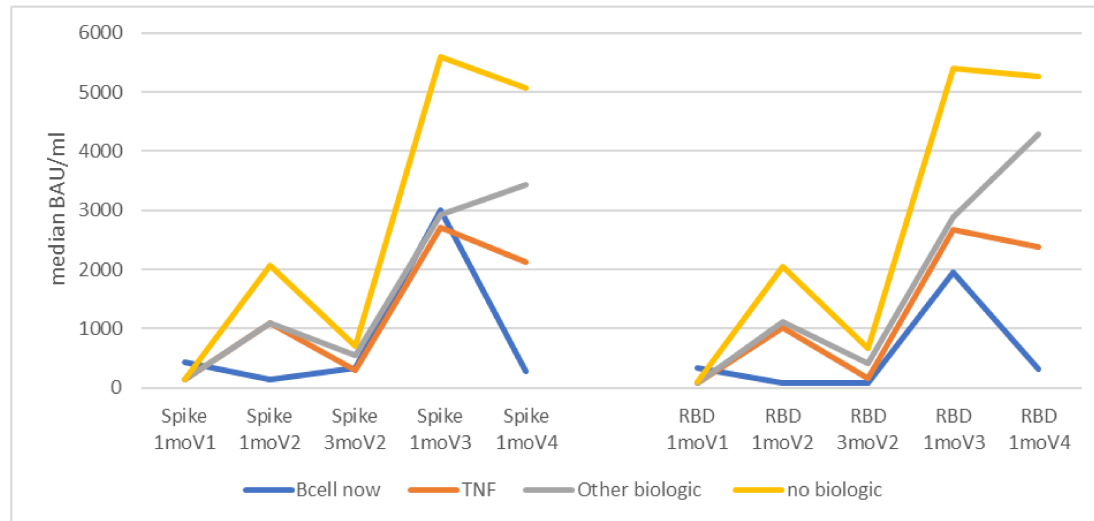

|         | B cell targeting now | anti-TNF | other biologic | no biologic | B cell targeting past |
|---------|----------------------|----------|----------------|-------------|-----------------------|
| N 1moV1 | 2                    | 14       | 8              | 77          | 2                     |
| N 1moV2 | 5                    | 37       | 16             | 152         | 4                     |
| N 3moV2 | 5                    | 34       | 20             | 154         | 5                     |
| N 1moV3 | 8                    | 34       | 19             | 140         | 5                     |
| N 1moV4 | 5                    | 18       | 11             | 46          | 5                     |

Supplemental Figure 5 Median titers of anti-Spike and anti-RBD for individuals on different biologic categories and number participants in each treatment category for each visit.

Hitchon et al  
Supplemental Tables and Figures

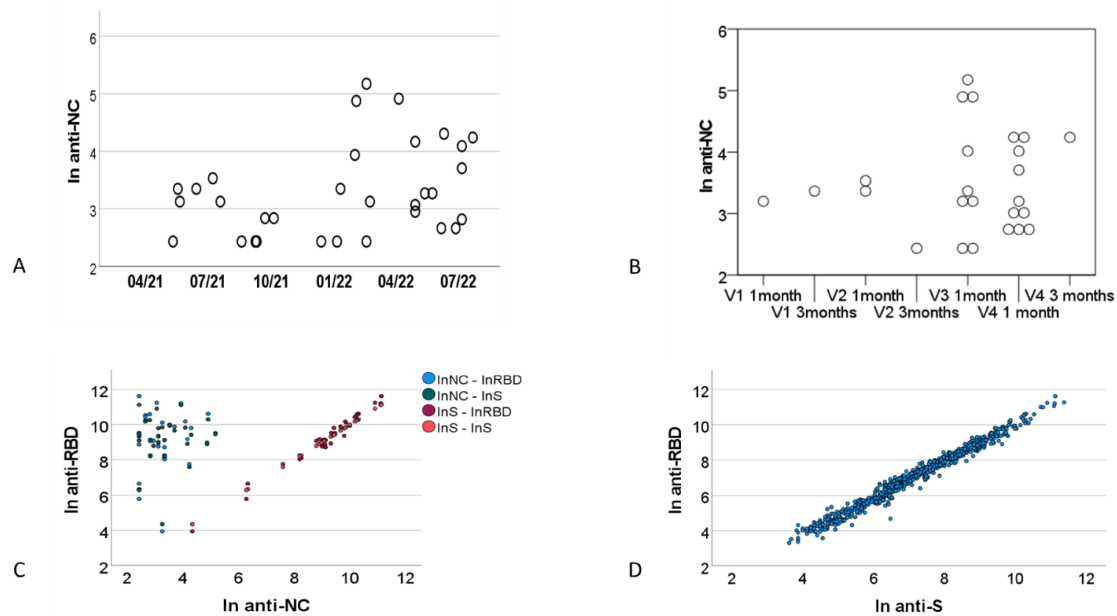

Supplemental Figure 6 Anti-Nucleocapsid antibody levels and correlations with Anti-Spike and Anti-Receptor Binding Domain antibodies

- A. Anti-NC titer by Calendar month/year B. Anti-NC titer by Study visit C. Correlation of anti-NC anti RBD and anti-S1 titers in samples seropositive for anti-NC D. Correlation of anti-RBD and anti-S1 titers in all seropositive samples.

NC = nucleocapsid S = Spike; RBD = receptor binding domain; ln = natural log. V1 = vaccine 1; V2 = vaccine 2; V3 = vaccine 3; V4= vaccine 4. Values are natural log transformed BAU/ml.

Spearman correlation coefficient anti-NC with anti-S1 = 0.06 ( $p=NS$ ); anti-NC with anti-RBD = 0.03 ( $p=NS$ ); anti-S with anti-RBD 0.96  $p<0.001$ . Figure 3 Disease activity before and after each vaccine

A Inflammatory arthritis B Systemic autoimmune rheumatic disease C Inflammatory bowel disease D Multiple Sclerosis

RAPID-3 Routine Assessment of Patient Index Data 3; SLAQ Systemic lupus activity questionnaire IBDSI-SF Inflammatory bowel disease symptom inventory – short form; EDSS Expanded disability status scale. V1 vaccine one; V2 vaccine two; V3 vaccine 3; V4 vaccine 4; mo = month(s).

Hitchon et al  
Supplemental Tables and Figures

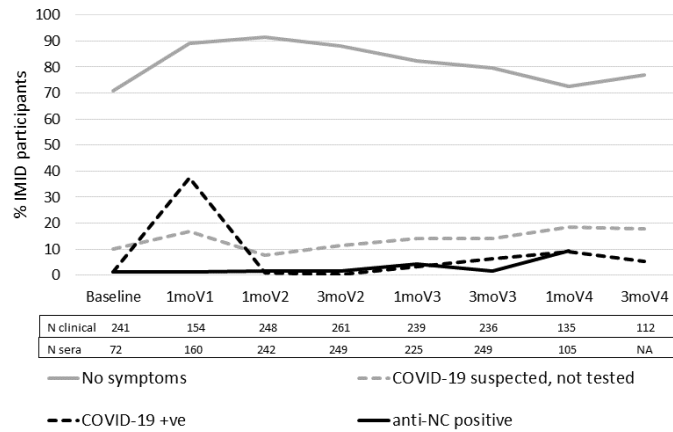

Supplemental Figure 7 COVID-19 infection

Grey line = no COVID-19 symptoms reported; Dashed grey line = COVID-19 suspected but not tested; dashed black line = COVID-19 infection confirmed by community based testing (rapid detection or polymerase chain reaction test); solid black line = proportion anti-nucleocapsid seropositive.

V1 vaccine one; V2 vaccine two; V3 vaccine 3; V4 vaccine 4; mo = month(s); N = number
